# Supplementary material for: Lack of Association between Human Plasma Oxytocin and Interpersonal Trust in a Prisoner’s Dilemma Paradigm
Source: PLoS One. 2014 Dec 30;9(12):e116172. doi: 10.1371/journal.pone.0116172 (PMC4280178; doi:10.1371/journal.pone.0116172)
Supplement: S1 Data — Raw data from Experiment One. This spreadsheet has all individual concentration values for Experiment One, split between RIA and ELISA results on individual sheets. (XLSX) [file pone.0116172.s002.xlsx]

## Sheet: RIA
		Extracted		Unextracted
Participant	Spiking	Oxytocin concentration, pg/mL	CV, %	Oxytocin concentration, pg/mL	CV, %		*CV based on duplicate assay
A	spiked	9.82824	3.95911	4.41326	2.03853
A	unspiked	0.497615	0.157775	3.03011	4.33238
B	spiked	10.5631	3.32042	5.31177	3.1149
B	unspiked	1.94769	2.38471	3.56201	1.90555
C	spiked	12.9733	3.73741	5.04999	1.23182
C	unspiked	1.2982	0.0562647	4.11179	3.7118
D	spiked	11.5069	4.43739	5.24773	2.94301
D	unspiked	1.54992	7.88967	3.06089	2.26794
E	spiked	13.962	8.94559	4.41326	0.176566
E	unspiked	1.5087	0.6571	3.01992	5.009
F	spiked	9.49621	4.74744	6.01296	4.60595
F	unspiked	1.17815	11.2445	5.20547	7.72695
G	spiked	14.3435	6.26089	5.68971	0.704298
G	unspiked	1.00967	3.82437	3.93823	2.4569
H	spiked	13.5999	6.24354	6.28642	0.887564
H	unspiked	0.850837	0.935017	4.24696	0.574138
I	spiked	14.7453	7.29662	5.37297	2.77248
I	unspiked	0.539889	2.73487	3.38418	1.3367
J	spiked	14.8851	2.92185	7.44491	6.9527
J	unspiked	0.614461	3.18793	4.00784	1.04248
K	spiked	12.0221	2.33616	6.26105	0.818697
K	unspiked	1.21115	3.07136	3.75677	2.75045
L	spiked	11.7894	3.08266	6.16061	3.50343
L	unspiked	0.843416	2.40298	2.43578	4.80037
M	spiked	12.6283	10.0178	4.72727	2.84191
M	unspiked	1.01035	1.30474	3.78472	4.02116

## Sheet: ELISA
		Extracted		Unextracted
Participant	Spiking	Oxytocin concentration, pg/mL	CV, %	Oxytocin concentration, pg/mL	CV, %
A	spiked	4	16.5136	26.5	50.2019
A	unspiked	2.1	7.62662	17.6	43.9654
B	spiked	1.7	29.8758	7.8	134.462
B	unspiked	5.2	21.6054	1.5	123.255
C	spiked	0.6	28.0441	30.4	122.705
C	unspiked	4.3	19.7196	0.2	97.8351
D	spiked	0.8	31.9711	10.7	36.7343
D	unspiked	2.6	21.4862	11.8	36.0441
E	spiked	0.7	29.4536	48.9	106.722
E	unspiked	1.1	21.111	20.2	97.7934
F	spiked	5.6	18.5072	4.8	40.6048
F	unspiked	4.3	8.99362	10.4	43.2266
G	spiked	3.1	20.6964	45.2	63.507
G	unspiked	9.3	11.664	37.7	66.6205
H	spiked	4.7	21.508	17.1	69.118
H	unspiked	3.4	11.577	24.7	68.4373
I	spiked	2	17.0723	28.9	27.5776
I	unspiked	15	6.1385	16.9	22.9801
J	spiked	3.2	21.151	11.4	35.9312
J	unspiked	2.7	10.9951	22.1	40.8446
K	spiked	2.6	26.659	26	277.16
K	unspiked	6.4	16.683	33.7	368.977
L	spiked	2.5	24.5934	8.4	83.5268
L	unspiked	6.4	16.4357	25.3	98.3029
M	spiked	1.6	17.393	37.1	304.1
M	unspiked	4.1	7.9755	5.7	146.945
