# Supplementary material for: Lack of Association between Human Plasma Oxytocin and Interpersonal Trust in a Prisoner’s Dilemma Paradigm
Source: PLoS One. 2014 Dec 30;9(12):e116172. doi: 10.1371/journal.pone.0116172 (PMC4280178; doi:10.1371/journal.pone.0116172)
Supplement: S2 Data — Raw data from Experiment Two. The individual sheets report values from before a round (pre) or after (post), with baseline not included (raw), proportion from baseline where available (div) or difference from baseline (sub). Trust behavior and partner trustworthiness are binary coded based on adherence to agreed-upon strategy, with 1 indicating adherence. (XLSX) [file pone.0116172.s003.xlsx]

## Sheet: Pre-Raw
Subject	Round	STAI	Mayer A	Mayer B	Mayer I	Ot pre	Trust/Mis	Partner Trust/mis
31016	1	1.9	2.66667	2	3	0.23	1	1
31016	2	1.55	3.16667	3.2	3	0.45	1	1
31016	3	1.7	5	5	4.33333	0.3	1	1
31016	4	1.35	5	5	4.33333	0.76	1	1
31017	1	1.35	3.33333	2	3.33333	2.07	1	1
31017	2	1.4	3.83333	2.8	3.83333	1.27	1	0
31017	3	1.5	4	3.4	3.5	0.31	1	1
31017	4	1.3	4	3.8	4	1.03	1	1
31018	1	1.15	5	5	4.66667	NaN	1	1
31018	2	1	3.33333	3	3	NaN	1	1
31018	3	1	5	5	5	NaN	1	1
31018	4	1.05	4.66667	5	5	NaN	1	1
31019	1	1	3.33333	3	3	NaN	1	1
31019	2	1	4.16667	3.8	3.66667	NaN	0	1
31019	3	1	4.83333	5	4.33333	NaN	1	1
31019	4	1	4.83333	5	4.33333	NaN	1	1
31020	1	1.35	3.83333	4.6	4.16667	0.25	1	1
31020	2	1.35	4	4.8	4	0.45	1	1
31020	3	1.6	2.66667	2.4	3	0.55	0	1
31020	4	2.2	2.66667	2.6	3	0.6	1	1
31021	1	1.25	3.83333	4.6	4	1.77	1	1
31021	2	1.05	4.16667	4.8	4	0.58	1	1
31021	3	1	3	3	3	0.97	1	1
31021	4	1	4	4	3.66667	1.02	0	1
31022	1	1.85	4.33333	4.8	4.5	NaN	1	1
31022	2	2.15	5	5	5	NaN	1	1
31022	3	2	3.5	3	3.16667	NaN	1	0
31022	4	2.4	3.16667	3	3	NaN	1	1
31023	1	1.95	4	5	4.5	1.85	1	1
31023	2	2.2	4	5	4.5	0.92	1	1
31023	3	2.35	3	3	3	1.01	1	1
31023	4	2.45	3	3	3	1.21	1	0
31024	1	2.8	2.83333	1.6	2.16667	NaN	0	1
31024	2	1.7	3.5	1.8	2.83333	NaN	0	1
31024	3	1.35	5	5	4.66667	NaN	1	1
31024	4	1.15	5	5	4.16667	NaN	1	1
31025	1	1.65	2.83333	2.2	3.16667	1.83	1	1
31025	2	1.75	3.16667	2.8	3	1.26	1	1
31025	3	1.75	4.16667	5	4.33333	0.95	1	1
31025	4	1.7	4.83333	5	4	1.06	1	1
31026	1	1	5	5	5	0.95	1	0
31026	2	1	4.66667	4.8	5	0.89	1	0
31026	3	1.15	5	5	5	0.97	1	1
31026	4	1	5	5	5	2.21	1	1
31027	1	1.5	3	1.6	2.66667	0.37	1	1
31027	2	1.4	3.16667	1.4	2.83333	0.54	1	1
31027	3	1.3	4.33333	4.8	4.5	0.59	1	1
31027	4	1.25	4.5	5	4.33333	0.51	1	1
31028	1	1.5	4.83333	4.6	4.5	NaN	1	1
31028	2	1.5	4.66667	5	4.5	NaN	1	1
31028	3	1.5	3	3	3	NaN	1	1
31028	4	1.5	3	3	3	NaN	1	1
31029	1	2.35	4	4.2	4.16667	NaN	1	1
31029	2	2.35	3.83333	4.2	3.66667	NaN	1	1
31029	3	2.5	3	3	3	NaN	1	1
31029	4	2.45	3	3	3	NaN	0	1
31030	1	1.05	3.5	3.2	3.16667	NaN	1	1
31030	2	1	3.16667	3.6	3.33333	NaN	1	1
31030	3	1	3	3	3	NaN	1	1
31030	4	1.1	3	3	3	NaN	1	1
31031	1	1.58824	3.83333	4	3.66667	1.55	1	1
31031	2	1.38889	4	4	3.66667	2.4	1	1
31031	3	1.5	4	4	3.66667	2.73	1	1
31031	4	1.8	4	4	3.66667	1.76	1	0
31032	1	1.15	3.16667	2.8	2.66667	1.1	1	1
31032	2	1.3	3.16667	3	3	0.7	0	1
31032	3	1	4.16667	4	3.66667	0.96	1	1
31032	4	1	4.66667	5	4.33333	NaN	1	1
31033	1	1	5	3	3	0.7	0	1
31033	2	1	5	3	3	0.65	1	0
31033	3	1	5	5	4.33333	1.62	1	1
31033	4	1	5	5	4.33333	0.58	1	1
31034	1	1	3.33333	2.4	3	2.54	1	1
31034	2	1	3.16667	3.4	3	1.17	1	0
31034	3	1	4	5	5	0.72	1	1
31034	4	1	4	5	5	2.02	1	1
31035	1	2	3.33333	3	3	0.61	1	0
31035	2	2.05	3.33333	2	2.5	1.25	0	1
31035	3	1.8	4.66667	5	5	1.69	1	1
31035	4	2.1	4.66667	5	5	1.82	1	1
31036	1	1.2	5	5	5	NaN	1	1
31036	2	1.1	5	5	5	NaN	1	1
31036	3	1.95	3.33333	1.6	2.66667	NaN	0	1
31036	4	1.4	4	3	3.5	NaN	1	1
31037	1	1	4.66667	4.4	4	NaN	1	1
31037	2	1	4.5	4.4	4.5	NaN	1	1
31037	3	1.9	3	2.8	3	NaN	0	1
31037	4	1.9	3.16667	3	3.16667	NaN	0	0
31038	1	1.85	3.83333	4.6	3.83333	0.157073	1	1
31038	2	2	4	4.4	3.83333	0.107164	1	1
31038	3	2.05	3.83333	2.4	3	0.137052	1	0
31038	4	2.15	3.66667	2	2.5	NaN	1	1
31039	1	1.2	4.33333	4.4	4.16667	NaN	1	1
31039	2	1.25	4.33333	4.8	4.16667	NaN	1	1
31039	3	1.2	3.66667	3	3	NaN	1	0
31039	4	1.15	3.5	3	3	NaN	0	0
31040	1	1	3.16667	2.8	2.83333	0.19432	1	1
31040	2	1	3.16667	3	3	0.182845	1	1
31040	3	1	4.16667	4.2	4.33333	0.138333	1	1
31040	4	1	4.16667	4	4.33333	0.135211	1	1
31041	1	2.1	3	2.6	3.16667	NaN	1	1
31041	2	1.95	3	2.6	3	NaN	0	1
31041	3	1.85	3.5	4	3.16667	NaN	1	1
31041	4	1.8	3.66667	3.6	3.5	NaN	1	1
31042	1	1.75	3.16667	2.8	2.83333	0.253825	1	1
31042	2	1.55	3.16667	3.4	2.83333	0.155225	1	1
31042	3	1.45	5	5	4.66667	0.343594	1	1
31042	4	1.5	5	5	4.66667	0.4298	1	1
31043	1	1.75	3.5	3	3.16667	0.326881	1	1
31043	2	1.65	3.33333	3	3	0.160069	1	0
31043	3	1.25	4.5	5	5	0.241127	1	1
31043	4	1.25	4.66667	5	5	0.173069	1	1
31044	1	1	4.83333	4.8	4.33333	0.274819	1	1
31044	2	1	4.83333	4.6	4.16667	0.224923	1	1
31044	3	1	4	3.6	3.66667	0.329318	1	1
31044	4	1	4	3.6	3.66667	0.439723	1	1
31045	1	1.3	4.5	4.4	4	0.251892	1	1
31045	2	1.15	4.5	4.6	4.33333	0.228565	1	1
31045	3	1.2	3	3	3	0.228565	1	0
31045	4	1.7	3	2.2	2.5	0.260188	0	1
31046	1	2.10526	4.33333	5	4.33333	NaN	1	1
31046	2	1.85	4.5	5	4.16667	NaN	1	1
31046	3	2.3	3.5	2.8	3	NaN	1	1
31046	4	2.4	4.16667	2.6	3	NaN	1	1
31047	1	1.75	4.16667	5	5	NaN	1	1
31047	2	1.5	4.33333	5	5	NaN	1	1
31047	3	3.1	4	1	2.33333	NaN	0	1
31047	4	1.1	4.16667	1	2.66667	NaN	1	0
31048	1	1.5	4	3.4	3.33333	0.279171	1	1
31048	2	1.4	3.66667	3.6	3.33333	0.161341	1	1
31048	3	1.15	4.66667	4.8	4.83333	0.165766	1	1
31048	4	1.5	4.83333	5	3.66667	0.142957	1	1
31049	1	1.25	3.16667	3	3	0.229182	1	1
31049	2	1.2	3	3	3	0.170979	1	1
31049	3	1.2	3.66667	4	4.16667	0.313031	1	1
31049	4	1.2	4	4	3.66667	NaN	1	1
31050	1	1.75	3.66667	3.2	3	NaN	1	1
31050	2	1.65	3.66667	3.2	3.16667	NaN	1	1
31050	3	1.6	4.83333	5	4.83333	NaN	1	1
31050	4	1.6	4.83333	5	5	NaN	1	1
31051	1	1.75	3.83333	3	3	0.644922	1	1
31051	2	1.85	4	3	3.5	0.44455	1	1
31051	3	1	5	5	4.83333	0.260064	1	1
31051	4	1	5	5	4.83333	0.394529	1	1
31052	1	1.3	3.83333	3.8	3.5	NaN	1	1
31052	2	1.4	3.16667	3.4	3.66667	NaN	1	1
31052	3	1.35	3.66667	2.6	3.16667	NaN	1	1
31052	4	1.2	3.5	3.2	3.5	NaN	1	1
31053	1	1.05	4.5	4.4	4.16667	NaN	1	1
31053	2	1.25	4.5	4.2	4.5	NaN	1	1
31053	3	1.3	3.5	1.8	3.16667	NaN	0	1
31053	4	1	3.66667	2.8	3.5	NaN	1	1
31054	1	1.1	5	5	5	NaN	1	1
31054	2	1.05	5	5	5	NaN	1	1
31054	3	1.25	3.83333	2.8	3.33333	NaN	1	1
31054	4	1	4.16667	3.8	3.66667	NaN	1	1
31055	1	1.1	4.66667	5	5	NaN	1	1
31055	2	1.1	4.66667	5	5	NaN	1	1
31055	3	1.25	3.5	3	2.83333	NaN	1	0
31055	4	1.6	3.66667	3.4	3	NaN	1	1
31056	1	1.4	4	2.8	3.5	0.323335	1	1
31056	2	1.45	3.66667	2.8	3.66667	0.283923	1	1
31056	3	1.25	4.16667	4.2	4.66667	0.48431	1	1
31056	4	1.05	4.83333	4.6	4.16667	0.418211	1	1
31057	1	1.3	3.33333	3	2.83333	0.391632	1	1
31057	2	1.1	3.5	3.4	3.16667	0.274936	1	1
31057	3	1.25	4.83333	4.4	4.66667	0.549327	1	1
31057	4	1.3	5	4.6	5	0.312264	1	1
31058	1	2.75	3	3	2.66667	0.464603	1	1
31058	2	2.5	3.33333	3.8	3.5	0.577333	1	1
31058	3	1.95	4.5	5	4.83333	0.522054	1	1
31058	4	2.1	4.5	5	4.83333	0.449295	1	1
31059	1	2	3.33333	2.8	2.83333	0.336599	1	1
31059	2	2	3.33333	3	3.16667	0.398514	1	1
31059	3	2.25	4.66667	5	3.66667	0.346206	1	1
31059	4	2.05	5	5	4	0.342056	1	1
31060	1	1.5	4	4	4	NaN	1	1
31060	2	1.5	4	4	4	NaN	1	1
31060	3	1.6	3.66667	3.4	3.83333	NaN	1	1
31060	4	1.6	4	4	4	NaN	1	1
31061	1	1	5	3.4	5	0.377209	1	1
31061	2	1	4.83333	4	5	0.308107	1	1
31061	3	1	3	1	2	0.351112	1	1
31061	4	1	3	1	2	0.50553	0	1
31062	1	1.05	4.5	4.6	4.16667	NaN	1	1
31062	2	1.6	4.66667	4.6	4.33333	NaN	1	1
31062	3	1	4	2.4	2.83333	NaN	1	1
31062	4	1	4.16667	3.6	3.5	NaN	1	1
31063	1	1.8	4.16667	4.2	3.83333	NaN	1	1
31063	2	1.95	4.33333	4	4	NaN	1	1
31063	3	1.95	3	3	3	NaN	1	1
31063	4	1.95	4	3	3	NaN	1	0
31064	1	1.3	3.16667	3.4	3.33333	1.20067	1	1
31064	2	1.25	3.83333	3.8	3.5	1.32229	1	1
31064	3	1.15	4.16667	4.4	3.16667	1.75354	1	1
31064	4	1.35	4.16667	3.8	3.16667	2.10594	1	1
31065	1	1	3	3	3	1.16735	0	1
31065	2	1	3	3	3	1.1176	0	0
31065	3	1	3.66667	4.8	4.83333	2.93699	1	1
31065	4	1	4.16667	5	5	52.558	1	1
31066	1	1.5	3	3	3	NaN	1	1
31066	2	1.45	3.16667	3	3.16667	NaN	1	1
31066	3	1	5	4.2	3.83333	NaN	1	1
31066	4	1	5	4.4	4.16667	NaN	1	1
31067	1	1.65	3.83333	3.8	4	1.22885	1	0
31067	2	2.4	3.33333	2.8	3.5	1.36062	0	0
31067	3	1.5	4.66667	4.4	4.16667	1.39131	1	1
31067	4	1.45	4.5	4.4	3.83333	1.59044	1	1
31068	1	1.3	4.16667	4.2	4.83333	0.395581	1	1
31068	2	1.1	4.66667	4.6	5	0.588989	1	1
31068	3	1.1	3.33333	2.8	2.83333	0.254085	1	1
31068	4	1.10526	3.66667	3	3.5	0.354299	1	1
31069	1	1.85	3.83333	3.6	4	0.327305	1	1
31069	2	1.85	3.83333	3.6	4	0.507261	1	1
31069	3	2.1	3.5	2.4	3.16667	0.387027	1	1
31069	4	2.15	3.5	3	2.83333	0.206624	1	1
31070	1	1.1	4.83333	4.8	5	0.200323	1	1
31070	2	1.05	4.83333	5	4.33333	0.289312	1	1
31070	3	1.1	4.16667	3.2	3.66667	0.188807	1	1
31070	4	1	4.66667	4.2	4	0.191579	1	1
31071	1	1	4.83333	5	5	0.208895	1	1
31071	2	1	4.83333	5	4.83333	0.163648	1	1
31071	3	1	4	3	3	0.171899	1	1
31071	4	1	4.33333	3	3	0.158081	1	1
31072	1	1.95	3.33333	3	3	2.19302	1	1
31072	2	2.15	3	3	3	3.23777	1	1
31072	3	2.05	3.83333	4	3.83333	1.81427	1	1
31072	4	2.05	3.66667	4	3.66667	2.0148	1	1
31073	1	1.2	3.66667	3.8	3.33333	NaN	1	1
31073	2	1.15	3.66667	4	3.83333	NaN	1	1
31073	3	1.2	5	5	4.83333	NaN	1	1
31073	4	1.2	5	5	4.83333	NaN	1	1
31074	1	2	3.5	2.4	3.16667	9.82526	1	1
31074	2	2	3.16667	2.2	3.16667	3.94583	1	1
31074	3	2	4	4.8	4.16667	NaN	1	1
31074	4	2	4.16667	5	3.66667	5.62555	1	1
31075	1	1.55	3	3	3	4.20013	1	1
31075	2	1.4	3.66667	3.4	3.16667	4.30126	1	1
31075	3	1.05	5	5	3.83333	1.35356	1	1
31075	4	1.15789	5	5	4	2.24082	1	1
31076	1	1	5	5	5	NaN	1	1
31076	2	1	5	5	5	NaN	1	1
31076	3	1	3.5	3	3.83333	NaN	1	1
31076	4	1	4	3	4	NaN	0	1
31077	1	1	5	5	5	NaN	1	1
31077	2	1.35	5	5	5	NaN	1	1
31077	3	1.35	3	1.4	2.66667	NaN	0	1
31077	4	1.55	3.66667	3.4	4.5	NaN	0	1
31078	1	1.25	5	5	4.33333	1.9633	1	1
31078	2	1.75	5	5	4.33333	2.1351	1	1
31078	3	1.15	4	4	3.66667	2.062	1	1
31078	4	1.15	4	4	3.66667	2.04484	1	0
31079	1	1	4.83333	5	5	NaN	1	1
31079	2	1.1	4.83333	5	5	NaN	1	1
31079	3	2	3.16667	3	3	NaN	1	0
31079	4	1	3.66667	3.6	3.33333	NaN	1	0
31080	1	1.3	3.83333	2.2	3.5	0.144581	1	1
31080	2	1.3	4.66667	2.6	3.66667	0.123953	1	1
31080	3	1.8	3.66667	2.2	3.16667	0.100616	0	0
31080	4	2	3.66667	2.6	4	0.155793	0	0
31081	1	1.2	3.83333	3.2	3.83333	NaN	1	0
31081	2	1.2	3.66667	3	3.83333	NaN	1	0
31081	3	1.05	3	3	3	NaN	1	1
31081	4	1.2	3	3	3	NaN	1	1
31082	1	1.75	3.5	3	3	0.217834	1	1
31082	2	1.6	3.66667	3.2	3.5	0.1534	1	1
31082	3	1.2	3.33333	3	3	0.144186	1	1
31082	4	1.5	3	2.4	3	0.178765	1	1
31083	1	2.55	3.83333	3.2	3.33333	0.313018	0	1
31083	2	2.6	3.66667	3	3	0.103875	0	1
31083	3	2.2	3.5	3	3.16667	0.117574	0	0
31083	4	2.35	3.5	3	3	0.212929	0	0
31088	1	1.1	3	2.6	3	NaN	1	1
31088	2	1.05	2.83333	2	3.16667	NaN	1	1
31088	3	1.05	3.66667	2.2	3.16667	NaN	1	1
31088	4	1.3	3.5	1.8	3.33333	NaN	1	1
31089	1	1.1	3.16667	3	3.16667	0.977748	1	1
31089	2	1.05	3.16667	3	3.16667	1.46636	1	1
31089	3	1	3	3	3	1.06429	1	1
31089	4	1	3	3	3.16667	1.53534	1	1
31090	1	1.63158	4	4	3.66667	1.6508	1	1
31090	2	1.15	3	3	3	0.902323	1	1
31090	3	1.1	3	3	3	1.53037	1	1
31090	4	1.15789	3	3	3	1.80625	1	1
31091	1	1.4	4	4	4	0.983462	1	1
31091	2	1.45	4	4	4	1.0486	1	1
31091	3	1.45	4	4	4	1.04928	1	1
31091	4	1.5	2.83333	2	1.66667	1.07956	1	1
31092	1	2.45	3.66667	2.8	3.66667	0.951646	1	1
31092	2	1.5	3.5	2.4	3.33333	0.992282	1	1
31092	3	1.75	3.66667	2.8	3.66667	1.0789	1	1
31092	4	1.65	3.83333	3.6	3.83333	1.42305	1	1
31093	1	1.45	4.33333	3.2	3.33333	NaN	1	1
31093	2	1.5	4.66667	3.2	4.16667	NaN	1	1
31093	3	1.4	4.33333	3.2	4.16667	NaN	1	1
31093	4	1.6	4.83333	3.4	4.66667	NaN	1	0
31094	1	1.5	3.66667	3.6	3.33333	0.7984	1	1
31094	2	1.05	4	3.4	4	0.676458	1	1
31094	3	1.45	3	2	3	0.45575	1	1
31094	4	1.45	3.66667	3	3.16667	0.464688	0	1
31095	1	1.45	3.83333	2.6	3.83333	NaN	1	1
31095	2	1.45	3.66667	3	3.83333	NaN	1	1
31095	3	1.45	3.66667	2.6	3.83333	NaN	1	1
31095	4	1.5	3.83333	3	3.5	NaN	1	1
31096	1	1.75	3.5	3	3	NaN	1	1
31096	2	1.65	3.23529	3	3.33333	NaN	1	1
31096	3	1.9	3.17647	3	3.16667	NaN	1	1
31096	4	1.85	3.35294	3.2	3.16667	NaN	1	1
31097	1	1.9	3.05882	3.2	3	0.501607	1	1
31097	2	1.55	3.41176	3.8	3.16667	0.330024	1	1
31097	3	1.5	3.11765	3.2	3	0.512453	1	1
31097	4	1.55	3.05882	3.2	3	0.444911	1	1
31098	1	1.55	3.11765	3	3	0.409676	1	1
31098	2	1.65	2.94118	3	2.83333	0.427257	1	1
31098	3	1.4	3.23529	3	3	0.566825	1	1
31098	4	1.35	3.23529	3	3	0.736634	1	1
31099	1	1.9	3.5	3	2.83333	0.335874	1	1
31099	2	2	3.23529	3	3.33333	0.347091	1	1
31099	3	2.5	3.23529	3	3	0.521138	1	1
31099	4	2.2	3.47059	3	3.33333	0.352166	1	1
31100	1	1.75	2.41176	1	2.83333	NaN	0	1
31100	2	1.4	2.58824	1.6	3	NaN	0	1
31100	3	1.7	2.58824	1.4	3	NaN	0	1
31100	4	1.55	2.70588	1.8	3	NaN	0	1
31101	1	1.1	3.66667	3.8	3.16667	0.60578	1	1
31101	2	1.35	3	3	2.66667	0.404081	0	1
31101	3	1	3.58824	3.4	3.66667	0.425953	0	1
31101	4	1	3.94118	3.6	4.16667	0.446273	1	1
31104	1	2	3.66667	2.6	3.16667	0.517963	1	1
31104	2	2	2.94118	2.4	2.83333	0.533354	0	0
31104	3	2	3.05882	2.6	3	1.0962	1	1
31104	4	2	3.05882	2.4	3	0.896438	1	1
31105	1	1.8	2.88235	2.2	3.16667	0.474399	1	1
31105	2	1.85	2.76471	2	3.33333	0.653873	1	1
31105	3	1.85	2.82353	2	3.16667	0.400394	1	1
31105	4	1.85	2.76471	2	3.16667	0.534035	1	1
31106	1	2.25	2.52941	2	2.66667	0.534852	1	1
31106	2	2.25	2.52941	2	2.66667	0.587997	0	0
31106	3	2.05	2.64706	2	2.83333	0.525135	1	1
31106	4	1.8	2.64706	2.2	3	1.00836	1	1
31107	1	1.45	3.83333	3	2.83333	0.425628	1	1
31107	2	1.35	3.23529	2.8	3.16667	0.361986	1	1
31107	3	1.6	3.11765	2.8	3	0.659895	1	1
31107	4	1.15	3.23529	2.8	3.33333	0.570736	1	1
31108	1	1.8	3.33333	2.2	2.83333	1.14722	1	1
31108	2	1.55	3.82353	4	3.66667	1.32453	1	1
31108	3	1.3	2.58824	2	2	1.73616	1	1
31108	4	1.45	3.11765	2.8	2.66667	1.08841	1	1
31109	1	1.7	3.41176	3	3.16667	0.864256	0	0
31109	2	1.5	2.64706	2.4	2.83333	0.773545	0	1
31109	3	1.5	3.05882	2.8	3.5	0.981754	0	1
31109	4	1.15	3.52941	3.2	3.66667	0.647411	0	1
31110	1	1.95	3.05882	2.6	2.83333	0.706863	1	1
31110	2	1.6	3.05882	2.6	2.83333	0.825444	1	1
31110	3	1.55	3.11765	3	3	0.585308	1	0
31110	4	1.55	3.11765	3	3	0.869459	1	0
31111	1	1.25	2.83333	1.8	3	0.888936	0	0
31111	2	1	2.52941	1.4	3	0.897809	1	0
31111	3	1.15	2.52941	1.4	3	0.798158	1	1
31111	4	1	2.52941	1.4	3	0.778288	1	1
31112	1	2.2	3.16667	3	3	1.00247	1	1
31112	2	2.1	3.17647	3	3	0.760122	1	1
31112	3	2.1	3.11765	3	3	0.762398	1	1
31112	4	2.2	3.17647	3	3	1.23087	1	1
31113	1	1.9	3.29412	3.2	3	NaN	1	1
31113	2	1.9	3.17647	3	3	NaN	1	0
31113	3	1.95	3.35294	3	3	NaN	1	0
31113	4	1.95	3.23529	3	3	NaN	1	0
31114	1	1	3.52941	3.4	3.66667	0.293366	1	1
31114	2	1	3.52941	3.4	4	0.399384	1	1
31114	3	1	2.64706	2.4	2.83333	0.857873	0	1
31114	4	1.15	2.70588	2.4	2.83333	0.430312	0	1
31115	1	1.5	3.5	3	3.5	NaN	1	1
31115	2	1.5	3.23529	3	3.5	NaN	0	1
31115	3	1.7	3.05882	2.2	3.33333	NaN	1	1
31115	4	1.3	3.70588	3.8	4	NaN	1	1
31118	1	1.05	3.17647	2.6	3	NaN	1	0
31118	2	1	3.17647	3	3	NaN	1	0
31118	3	1.05	3.11765	3	3	NaN	1	0
31118	4	1	3.05882	3	3	NaN	1	1
31119	1	1.55	3.17647	3	3.5	0.820423	1	1
31119	2	1.1	3.41176	3	3.16667	0.792107	1	0
31119	3	1.2	3.52941	3.6	3.33333	1.15054	1	0
31119	4	1.6	4.23529	4.4	4.16667	1.32192	1	0
31120	1	1.95	3.47059	3.6	3.66667	1.90292	1	1
31120	2	1.85	3.11765	2.4	4	1.60559	1	1
31120	3	1.95	3.29412	2.6	3.83333	1.22422	1	1
31120	4	1.7	3.52941	3	4.16667	1.402	1	1
31121	1	1.5	2.94118	2.4	3.16667	NaN	0	1
31121	2	1.15	3.23529	2.6	3.5	NaN	0	1
31121	3	1.4	3.17647	2.4	3.5	NaN	1	1
31121	4	1.5	2.76471	2.4	3	NaN	1	1
31122	1	1.65	3.11765	2.2	3.33333	1.29098	1	1
31122	2	2.05	3.11765	3	3	0.942635	1	1
31122	3	2.3	3.11765	3	3	0.938027	1	1
31122	4	2.35	3.35294	3	3	1.03971	1	1
31123	1	1.15	3.05882	3	3	1.076	1	0
31123	2	1.2	2.41176	1.8	2.16667	0.812057	1	0
31123	3	1	3	3	3	0.73958	1	1
31123	4	1	3.35294	3.4	3.5	0.838717	1	1

## Sheet: Pre -Baseline Sub
Subject	Round	STAI	Mayer A	Mayer B	Mayer I	OT	Trust/Mis	Partner Trust/mis		STAI B	STAI Pre	Ot b	Ot pre
31016	1	0.2	2.66667	2	3	-0.12	1	1		1.7	1.9	0.35	0.23
31016	2	-0.15	3.16667	3.2	3	0.1	1	1		1.7	1.55	0.35	0.45
31016	3	0.2	5	5	4.33333	-0.01	1	1		1.5	1.7	0.31	0.3
31016	4	-0.15	5	5	4.33333	0.45	1	1		1.5	1.35	0.31	0.76
31017	1	0.05	3.33333	2	3.33333	1.76	1	1		1.3	1.35	0.31	2.07
31017	2	0.1	3.83333	2.8	3.83333	0.96	1	0		1.3	1.4	0.31	1.27
31017	3	0	4	3.4	3.5	-0.04	1	1		1.5	1.5	0.35	0.31
31017	4	-0.2	4	3.8	4	0.68	1	1		1.5	1.3	0.35	1.03
31018	1	0.15	5	5	4.66667	NaN	1	1		1	1.15	NaN	NaN
31018	2	0	3.33333	3	3	NaN	1	1		1	1	NaN	NaN
31018	3	0	5	5	5	NaN	1	1		1	1	NaN	NaN
31018	4	0.05	4.66667	5	5	NaN	1	1		1	1.05	NaN	NaN
31019	1	0	3.33333	3	3	NaN	1	1		1	1	NaN	NaN
31019	2	0	4.16667	3.8	3.66667	NaN	0	1		1	1	NaN	NaN
31019	3	0	4.83333	5	4.33333	NaN	1	1		1	1	NaN	NaN
31019	4	0	4.83333	5	4.33333	NaN	1	1		1	1	NaN	NaN
31020	1	0.15	3.83333	4.6	4.16667	-0.31	1	1		1.2	1.35	0.56	0.25
31020	2	0.15	4	4.8	4	-0.11	1	1		1.2	1.35	0.56	0.45
31020	3	0.05	2.66667	2.4	3	0.1	0	1		1.55	1.6	0.45	0.55
31020	4	0.65	2.66667	2.6	3	0.15	1	1		1.55	2.2	0.45	0.6
31021	1	0.1	3.83333	4.6	4	0.34	1	1		1.15	1.25	1.43	1.77
31021	2	-0.1	4.16667	4.8	4	-0.85	1	1		1.15	1.05	1.43	0.58
31021	3	0	3	3	3	0.16	1	1		1	1	0.81	0.97
31021	4	0	4	4	3.66667	0.21	0	1		1	1	0.81	1.02
31022	1	-0.65	4.33333	4.8	4.5	NaN	1	1		2.5	1.85	NaN	NaN
31022	2	-0.35	5	5	5	NaN	1	1		2.5	2.15	NaN	NaN
31022	3	0.3	3.5	3	3.16667	NaN	1	0		1.7	2	NaN	NaN
31022	4	0.7	3.16667	3	3	NaN	1	1		1.7	2.4	NaN	NaN
31023	1	-0.15	4	5	4.5	1.09	1	1		2.1	1.95	0.76	1.85
31023	2	0.1	4	5	4.5	0.16	1	1		2.1	2.2	0.76	0.92
31023	3	0.1	3	3	3	0.17	1	1		2.25	2.35	0.84	1.01
31023	4	0.2	3	3	3	0.37	1	0		2.25	2.45	0.84	1.21
31024	1	1.2	2.83333	1.6	2.16667	NaN	0	1		1.6	2.8	NaN	NaN
31024	2	0.1	3.5	1.8	2.83333	NaN	0	1		1.6	1.7	NaN	NaN
31024	3	0.25	5	5	4.66667	NaN	1	1		1.1	1.35	NaN	NaN
31024	4	0.05	5	5	4.16667	NaN	1	1		1.1	1.15	NaN	NaN
31025	1	-0.35	2.83333	2.2	3.16667	0.29	1	1		2	1.65	1.54	1.83
31025	2	-0.25	3.16667	2.8	3	-0.28	1	1		2	1.75	1.54	1.26
31025	3	-0.1	4.16667	5	4.33333	-0.48	1	1		1.85	1.75	1.43	0.95
31025	4	-0.15	4.83333	5	4	-0.37	1	1		1.85	1.7	1.43	1.06
31026	1	-0.05	5	5	5	0.23	1	0		1.05	1	0.72	0.95
31026	2	-0.05	4.66667	4.8	5	0.17	1	0		1.05	1	0.72	0.89
31026	3	0.15	5	5	5	-0.15	1	1		1	1.15	1.12	0.97
31026	4	0	5	5	5	1.09	1	1		1	1	1.12	2.21
31027	1	0	3	1.6	2.66667	-0.06	1	1		1.5	1.5	0.43	0.37
31027	2	-0.1	3.16667	1.4	2.83333	0.11	1	1		1.5	1.4	0.43	0.54
31027	3	0	4.33333	4.8	4.5	0.02	1	1		1.3	1.3	0.57	0.59
31027	4	-0.05	4.5	5	4.33333	-0.06	1	1		1.3	1.25	0.57	0.51
31028	1	0	4.83333	4.6	4.5	NaN	1	1		1.5	1.5	NaN	NaN
31028	2	0	4.66667	5	4.5	NaN	1	1		1.5	1.5	NaN	NaN
31028	3	0	3	3	3	NaN	1	1		1.5	1.5	NaN	NaN
31028	4	0	3	3	3	NaN	1	1		1.5	1.5	NaN	NaN
31029	1	0.05	4	4.2	4.16667	NaN	1	1		2.3	2.35	NaN	NaN
31029	2	0.05	3.83333	4.2	3.66667	NaN	1	1		2.3	2.35	NaN	NaN
31029	3	0	3	3	3	NaN	1	1		2.5	2.5	NaN	NaN
31029	4	-0.05	3	3	3	NaN	0	1		2.5	2.45	NaN	NaN
31030	1	-0.2	3.5	3.2	3.16667	NaN	1	1		1.25	1.05	NaN	NaN
31030	2	-0.25	3.16667	3.6	3.33333	NaN	1	1		1.25	1	NaN	NaN
31030	3	0	3	3	3	NaN	1	1		1	1	NaN	NaN
31030	4	0.1	3	3	3	NaN	1	1		1	1.1	NaN	NaN
31031	1	-0.211765	3.83333	4	3.66667	0.46	1	1		1.8	1.58824	1.09	1.55
31031	2	-0.411111	4	4	3.66667	1.31	1	1		1.8	1.38889	1.09	2.4
31031	3	0.0789474	4	4	3.66667	-1.45	1	1		1.42105	1.5	4.18	2.73
31031	4	0.378947	4	4	3.66667	-2.42	1	0		1.42105	1.8	4.18	1.76
31032	1	-0.15	3.16667	2.8	2.66667	-2.11	1	1		1.3	1.15	3.21	1.1
31032	2	0	3.16667	3	3	-2.51	0	1		1.3	1.3	3.21	0.7
31032	3	0	4.16667	4	3.66667	0.03	1	1		1	1	0.93	0.96
31032	4	0	4.66667	5	4.33333	NaN	1	1		1	1	0.93	NaN
31033	1	0	5	3	3	-0.07	0	1		1	1	0.77	0.7
31033	2	0	5	3	3	-0.12	1	0		1	1	0.77	0.65
31033	3	0	5	5	4.33333	0.24	1	1		1	1	1.38	1.62
31033	4	0	5	5	4.33333	-0.8	1	1		1	1	1.38	0.58
31034	1	-0.15	3.33333	2.4	3	-0.09	1	1		1.15	1	2.63	2.54
31034	2	-0.15	3.16667	3.4	3	-1.46	1	0		1.15	1	2.63	1.17
31034	3	0	4	5	5	-0.87	1	1		1	1	1.59	0.72
31034	4	0	4	5	5	0.43	1	1		1	1	1.59	2.02
31035	1	0.2	3.33333	3	3	-0.06	1	0		1.8	2	0.67	0.61
31035	2	0.25	3.33333	2	2.5	0.58	0	1		1.8	2.05	0.67	1.25
31035	3	0.4	4.66667	5	5	-1.11	1	1		1.4	1.8	2.8	1.69
31035	4	0.7	4.66667	5	5	-0.98	1	1		1.4	2.1	2.8	1.82
31036	1	0	5	5	5	NaN	1	1		1.2	1.2	NaN	NaN
31036	2	-0.1	5	5	5	NaN	1	1		1.2	1.1	NaN	NaN
31036	3	0.65	3.33333	1.6	2.66667	NaN	0	1		1.3	1.95	NaN	NaN
31036	4	0.1	4	3	3.5	NaN	1	1		1.3	1.4	NaN	NaN
31037	1	0	4.66667	4.4	4	NaN	1	1		1	1	NaN	NaN
31037	2	0	4.5	4.4	4.5	NaN	1	1		1	1	NaN	NaN
31037	3	0.9	3	2.8	3	NaN	0	1		1	1.9	NaN	NaN
31037	4	0.9	3.16667	3	3.16667	NaN	0	0		1	1.9	NaN	NaN
31038	1	-0.05	3.83333	4.6	3.83333	0.0319542	1	1		1.9	1.85	0.125119	0.157073
31038	2	0.1	4	4.4	3.83333	-0.0179555	1	1		1.9	2	0.125119	0.107164
31038	3	0	3.83333	2.4	3	-0.0760603	1	0		2.05	2.05	0.213113	0.137052
31038	4	0.1	3.66667	2	2.5	NaN	1	1		2.05	2.15	0.213113	NaN
31039	1	0.05	4.33333	4.4	4.16667	NaN	1	1		1.15	1.2	NaN	NaN
31039	2	0.1	4.33333	4.8	4.16667	NaN	1	1		1.15	1.25	NaN	NaN
31039	3	0.1	3.66667	3	3	NaN	1	0		1.1	1.2	NaN	NaN
31039	4	0.05	3.5	3	3	NaN	0	0		1.1	1.15	NaN	NaN
31040	1	-0.05	3.16667	2.8	2.83333	0.0285544	1	1		1.05	1	0.165766	0.19432
31040	2	-0.05	3.16667	3	3	0.0170794	1	1		1.05	1	0.165766	0.182845
31040	3	0	4.16667	4.2	4.33333	-0.0846965	1	1		1	1	0.223029	0.138333
31040	4	0	4.16667	4	4.33333	-0.0878182	1	1		1	1	0.223029	0.135211
31041	1	0.3	3	2.6	3.16667	NaN	1	1		1.8	2.1	NaN	NaN
31041	2	0.15	3	2.6	3	NaN	0	1		1.8	1.95	NaN	NaN
31041	3	0.1	3.5	4	3.16667	NaN	1	1		1.75	1.85	NaN	NaN
31041	4	0.05	3.66667	3.6	3.5	NaN	1	1		1.75	1.8	NaN	NaN
31042	1	-0.2	3.16667	2.8	2.83333	0.0389396	1	1		1.95	1.75	0.214886	0.253825
31042	2	-0.4	3.16667	3.4	2.83333	-0.0596603	1	1		1.95	1.55	0.214886	0.155225
31042	3	-0.05	5	5	4.66667	0.134797	1	1		1.5	1.45	0.208797	0.343594
31042	4	0	5	5	4.66667	0.221002	1	1		1.5	1.5	0.208797	0.4298
31043	1	0.05	3.5	3	3.16667	0.268368	1	1		1.7	1.75	0.0585128	0.326881
31043	2	-0.05	3.33333	3	3	0.101556	1	0		1.7	1.65	0.0585128	0.160069
31043	3	0	4.5	5	5	-0.00886562	1	1		1.25	1.25	0.249992	0.241127
31043	4	0	4.66667	5	5	-0.0769235	1	1		1.25	1.25	0.249992	0.173069
31044	1	0	4.83333	4.8	4.33333	0.146956	1	1		1	1	0.127863	0.274819
31044	2	0	4.83333	4.6	4.16667	0.0970602	1	1		1	1	0.127863	0.224923
31044	3	0	4	3.6	3.66667	-0.085453	1	1		1	1	0.414771	0.329318
31044	4	0	4	3.6	3.66667	0.0249517	1	1		1	1	0.414771	0.439723
31045	1	-0.4	4.5	4.4	4	-0.0501929	1	1		1.7	1.3	0.302085	0.251892
31045	2	-0.55	4.5	4.6	4.33333	-0.0735204	1	1		1.7	1.15	0.302085	0.228565
31045	3	-0.1	3	3	3	-0.135267	1	0		1.3	1.2	0.363832	0.228565
31045	4	0.4	3	2.2	2.5	-0.103644	0	1		1.3	1.7	0.363832	0.260188
31046	1	0.705263	4.33333	5	4.33333	NaN	1	1		1.4	2.10526	NaN	NaN
31046	2	0.45	4.5	5	4.16667	NaN	1	1		1.4	1.85	NaN	NaN
31046	3	-0.15	3.5	2.8	3	NaN	1	1		2.45	2.3	NaN	NaN
31046	4	-0.05	4.16667	2.6	3	NaN	1	1		2.45	2.4	NaN	NaN
31047	1	0.25	4.16667	5	5	NaN	1	1		1.5	1.75	NaN	NaN
31047	2	0	4.33333	5	5	NaN	1	1		1.5	1.5	NaN	NaN
31047	3	0.5	4	1	2.33333	NaN	0	1		2.6	3.1	NaN	NaN
31047	4	-1.5	4.16667	1	2.66667	NaN	1	0		2.6	1.1	NaN	NaN
31048	1	0.15	4	3.4	3.33333	-0.0236126	1	1		1.35	1.5	0.302784	0.279171
31048	2	0.05	3.66667	3.6	3.33333	-0.141442	1	1		1.35	1.4	0.302784	0.161341
31048	3	-0.25	4.66667	4.8	4.83333	-0.0208271	1	1		1.4	1.15	0.186593	0.165766
31048	4	0.1	4.83333	5	3.66667	-0.0436353	1	1		1.4	1.5	0.186593	0.142957
31049	1	-0.1	3.16667	3	3	0.0730356	1	1		1.35	1.25	0.156147	0.229182
31049	2	-0.15	3	3	3	0.0148326	1	1		1.35	1.2	0.156147	0.170979
31049	3	0	3.66667	4	4.16667	-0.267297	1	1		1.2	1.2	0.580327	0.313031
31049	4	0	4	4	3.66667	NaN	1	1		1.2	1.2	0.580327	NaN
31050	1	-0.65	3.66667	3.2	3	NaN	1	1		2.4	1.75	NaN	NaN
31050	2	-0.75	3.66667	3.2	3.16667	NaN	1	1		2.4	1.65	NaN	NaN
31050	3	0.2	4.83333	5	4.83333	NaN	1	1		1.4	1.6	NaN	NaN
31050	4	0.2	4.83333	5	5	NaN	1	1		1.4	1.6	NaN	NaN
31051	1	0	3.83333	3	3	0.166739	1	1		1.75	1.75	0.478184	0.644922
31051	2	0.1	4	3	3.5	-0.033634	1	1		1.75	1.85	0.478184	0.44455
31051	3	0	5	5	4.83333	-0.151476	1	1		1	1	0.41154	0.260064
31051	4	0	5	5	4.83333	-0.0170106	1	1		1	1	0.41154	0.394529
31052	1	0	3.83333	3.8	3.5	NaN	1	1		1.3	1.3	NaN	NaN
31052	2	0.1	3.16667	3.4	3.66667	NaN	1	1		1.3	1.4	NaN	NaN
31052	3	0.15	3.66667	2.6	3.16667	NaN	1	1		1.2	1.35	NaN	NaN
31052	4	0	3.5	3.2	3.5	NaN	1	1		1.2	1.2	NaN	NaN
31053	1	-0.55	4.5	4.4	4.16667	NaN	1	1		1.6	1.05	NaN	NaN
31053	2	-0.35	4.5	4.2	4.5	NaN	1	1		1.6	1.25	NaN	NaN
31053	3	0.25	3.5	1.8	3.16667	NaN	0	1		1.05	1.3	NaN	NaN
31053	4	-0.05	3.66667	2.8	3.5	NaN	1	1		1.05	1	NaN	NaN
31054	1	-0.6	5	5	5	NaN	1	1		1.7	1.1	NaN	NaN
31054	2	-0.65	5	5	5	NaN	1	1		1.7	1.05	NaN	NaN
31054	3	0.1	3.83333	2.8	3.33333	NaN	1	1		1.15	1.25	NaN	NaN
31054	4	-0.15	4.16667	3.8	3.66667	NaN	1	1		1.15	1	NaN	NaN
31055	1	-0.15	4.66667	5	5	NaN	1	1		1.25	1.1	NaN	NaN
31055	2	-0.15	4.66667	5	5	NaN	1	1		1.25	1.1	NaN	NaN
31055	3	0.15	3.5	3	2.83333	NaN	1	0		1.1	1.25	NaN	NaN
31055	4	0.5	3.66667	3.4	3	NaN	1	1		1.1	1.6	NaN	NaN
31056	1	-0.05	4	2.8	3.5	-0.0589627	1	1		1.45	1.4	0.382298	0.323335
31056	2	0	3.66667	2.8	3.66667	-0.0983754	1	1		1.45	1.45	0.382298	0.283923
31056	3	0.05	4.16667	4.2	4.66667	0.0292582	1	1		1.2	1.25	0.455052	0.48431
31056	4	-0.15	4.83333	4.6	4.16667	-0.0368409	1	1		1.2	1.05	0.455052	0.418211
31057	1	-0.15	3.33333	3	2.83333	0.00183257	1	1		1.45	1.3	0.389799	0.391632
31057	2	-0.35	3.5	3.4	3.16667	-0.114863	1	1		1.45	1.1	0.389799	0.274936
31057	3	-0.15	4.83333	4.4	4.66667	0.239356	1	1		1.4	1.25	0.309971	0.549327
31057	4	-0.1	5	4.6	5	0.00229307	1	1		1.4	1.3	0.309971	0.312264
31058	1	0.3	3	3	2.66667	-0.0895298	1	1		2.45	2.75	0.554133	0.464603
31058	2	0.05	3.33333	3.8	3.5	0.0232003	1	1		2.45	2.5	0.554133	0.577333
31058	3	-0.35	4.5	5	4.83333	-0.00492021	1	1		2.3	1.95	0.526974	0.522054
31058	4	-0.2	4.5	5	4.83333	-0.0776783	1	1		2.3	2.1	0.526974	0.449295
31059	1	-0.1	3.33333	2.8	2.83333	-0.216791	1	1		2.1	2	0.553391	0.336599
31059	2	-0.1	3.33333	3	3.16667	-0.154876	1	1		2.1	2	0.553391	0.398514
31059	3	-0.15	4.66667	5	3.66667	-0.0834088	1	1		2.4	2.25	0.429615	0.346206
31059	4	-0.35	5	5	4	-0.0875593	1	1		2.4	2.05	0.429615	0.342056
31060	1	-0.5	4	4	4	NaN	1	1		2	1.5	NaN	NaN
31060	2	-0.5	4	4	4	NaN	1	1		2	1.5	NaN	NaN
31060	3	-0.3	3.66667	3.4	3.83333	NaN	1	1		1.9	1.6	NaN	NaN
31060	4	-0.3	4	4	4	NaN	1	1		1.9	1.6	NaN	NaN
31061	1	0	5	3.4	5	-0.00101234	1	1		1	1	0.378221	0.377209
31061	2	0	4.83333	4	5	-0.0701145	1	1		1	1	0.378221	0.308107
31061	3	0	3	1	2	-0.0268561	1	1		1	1	0.377968	0.351112
31061	4	0	3	1	2	0.127562	0	1		1	1	0.377968	0.50553
31062	1	-0.2	4.5	4.6	4.16667	NaN	1	1		1.25	1.05	NaN	NaN
31062	2	0.35	4.66667	4.6	4.33333	NaN	1	1		1.25	1.6	NaN	NaN
31062	3	0	4	2.4	2.83333	NaN	1	1		1	1	NaN	NaN
31062	4	0	4.16667	3.6	3.5	NaN	1	1		1	1	NaN	NaN
31063	1	-0.1	4.16667	4.2	3.83333	NaN	1	1		1.9	1.8	NaN	NaN
31063	2	0.05	4.33333	4	4	NaN	1	1		1.9	1.95	NaN	NaN
31063	3	0.05	3	3	3	NaN	1	1		1.9	1.95	NaN	NaN
31063	4	0.05	4	3	3	NaN	1	0		1.9	1.95	NaN	NaN
31064	1	0.2	3.16667	3.4	3.33333	0.206057	1	1		1.1	1.3	0.99461	1.20067
31064	2	0.15	3.83333	3.8	3.5	0.327678	1	1		1.1	1.25	0.99461	1.32229
31064	3	0.05	4.16667	4.4	3.16667	0.698517	1	1		1.1	1.15	1.05502	1.75354
31064	4	0.25	4.16667	3.8	3.16667	1.05092	1	1		1.1	1.35	1.05502	2.10594
31065	1	0	3	3	3	-0.621464	0	1		1	1	1.78881	1.16735
31065	2	0	3	3	3	-0.671214	0	0		1	1	1.78881	1.1176
31065	3	0	3.66667	4.8	4.83333	1.63841	1	1		1	1	1.29858	2.93699
31065	4	0	4.16667	5	5	51.2594	1	1		1	1	1.29858	52.558
31066	1	-0.05	3	3	3	NaN	1	1		1.55	1.5	NaN	NaN
31066	2	-0.1	3.16667	3	3.16667	NaN	1	1		1.55	1.45	NaN	NaN
31066	3	-0.45	5	4.2	3.83333	NaN	1	1		1.45	1	NaN	NaN
31066	4	-0.45	5	4.4	4.16667	NaN	1	1		1.45	1	NaN	NaN
31067	1	0.05	3.83333	3.8	4	-0.548039	1	0		1.6	1.65	1.77689	1.22885
31067	2	0.8	3.33333	2.8	3.5	-0.416269	0	0		1.6	2.4	1.77689	1.36062
31067	3	0	4.66667	4.4	4.16667	0.04478	1	1		1.5	1.5	1.34653	1.39131
31067	4	-0.05	4.5	4.4	3.83333	0.243905	1	1		1.5	1.45	1.34653	1.59044
31068	1	-0.4	4.16667	4.2	4.83333	0.11395	1	1		1.7	1.3	0.281632	0.395581
31068	2	-0.6	4.66667	4.6	5	0.307358	1	1		1.7	1.1	0.281632	0.588989
31068	3	0	3.33333	2.8	2.83333	-0.0288316	1	1		1.1	1.1	0.282917	0.254085
31068	4	0.00526316	3.66667	3	3.5	0.0713815	1	1		1.1	1.10526	0.282917	0.354299
31069	1	0	3.83333	3.6	4	-0.103246	1	1		1.85	1.85	0.430552	0.327305
31069	2	0	3.83333	3.6	4	0.0767089	1	1		1.85	1.85	0.430552	0.507261
31069	3	0.05	3.5	2.4	3.16667	-0.137621	1	1		2.05	2.1	0.524648	0.387027
31069	4	0.1	3.5	3	2.83333	-0.318024	1	1		2.05	2.15	0.524648	0.206624
31070	1	0.1	4.83333	4.8	5	0.022856	1	1		1	1.1	0.177467	0.200323
31070	2	0.05	4.83333	5	4.33333	0.111845	1	1		1	1.05	0.177467	0.289312
31070	3	0.05	4.16667	3.2	3.66667	-0.114666	1	1		1.05	1.1	0.303473	0.188807
31070	4	-0.05	4.66667	4.2	4	-0.111894	1	1		1.05	1	0.303473	0.191579
31071	1	0	4.83333	5	5	0.00838937	1	1		1	1	0.200506	0.208895
31071	2	0	4.83333	5	4.83333	-0.0368578	1	1		1	1	0.200506	0.163648
31071	3	0	4	3	3	-0.0398702	1	1		1	1	0.211769	0.171899
31071	4	0	4.33333	3	3	-0.0536884	1	1		1	1	0.211769	0.158081
31072	1	-0.15	3.33333	3	3	0.813043	1	1		2.1	1.95	1.37998	2.19302
31072	2	0.05	3	3	3	1.85779	1	1		2.1	2.15	1.37998	3.23777
31072	3	0.1	3.83333	4	3.83333	0.370261	1	1		1.95	2.05	1.44401	1.81427
31072	4	0.1	3.66667	4	3.66667	0.57079	1	1		1.95	2.05	1.44401	2.0148
31073	1	-0.3	3.66667	3.8	3.33333	NaN	1	1		1.5	1.2	NaN	NaN
31073	2	-0.35	3.66667	4	3.83333	NaN	1	1		1.5	1.15	NaN	NaN
31073	3	-0.1	5	5	4.83333	NaN	1	1		1.3	1.2	NaN	NaN
31073	4	-0.1	5	5	4.83333	NaN	1	1		1.3	1.2	NaN	NaN
31074	1	0	3.5	2.4	3.16667	5.11209	1	1		2	2	4.71317	9.82526
31074	2	0	3.16667	2.2	3.16667	-0.767338	1	1		2	2	4.71317	3.94583
31074	3	-0.05	4	4.8	4.16667	NaN	1	1		2.05	2	3.70969	NA
31074	4	-0.05	4.16667	5	3.66667	1.91586	1	1		2.05	2	3.70969	5.62555
31075	1	-0.1	3	3	3	-0.880606	1	1		1.65	1.55	5.08074	4.20013
31075	2	-0.25	3.66667	3.4	3.16667	-0.779475	1	1		1.65	1.4	5.08074	4.30126
31075	3	-0.25	5	5	3.83333	0.41608	1	1		1.3	1.05	0.937481	1.35356
31075	4	-0.142105	5	5	4	1.30334	1	1		1.3	1.15789	0.937481	2.24082
31076	1	-0.1	5	5	5	NaN	1	1		1.1	1	NaN	NaN
31076	2	-0.1	5	5	5	NaN	1	1		1.1	1	NaN	NaN
31076	3	0	3.5	3	3.83333	NaN	1	1		1	1	NaN	NaN
31076	4	0	4	3	4	NaN	0	1		1	1	NaN	NaN
31077	1	-0.15	5	5	5	NaN	1	1		1.15	1	NaN	NaN
31077	2	0.2	5	5	5	NaN	1	1		1.15	1.35	NaN	NaN
31077	3	0.2	3	1.4	2.66667	NaN	0	1		1.15	1.35	NaN	NaN
31077	4	0.4	3.66667	3.4	4.5	NaN	0	1		1.15	1.55	NaN	NaN
31078	1	-0.2	5	5	4.33333	-0.50664	1	1		1.45	1.25	2.46994	1.9633
31078	2	0.3	5	5	4.33333	-0.334834	1	1		1.45	1.75	2.46994	2.1351
31078	3	-0.3	4	4	3.66667	-0.368298	1	1		1.45	1.15	2.4303	2.062
31078	4	-0.3	4	4	3.66667	-0.38546	1	0		1.45	1.15	2.4303	2.04484
31079	1	-0.55	4.83333	5	5	NaN	1	1		1.55	1	NaN	NaN
31079	2	-0.45	4.83333	5	5	NaN	1	1		1.55	1.1	NaN	NaN
31079	3	0.75	3.16667	3	3	NaN	1	0		1.25	2	NaN	NaN
31079	4	-0.25	3.66667	3.6	3.33333	NaN	1	0		1.25	1	NaN	NaN
31080	1	-0.25	3.83333	2.2	3.5	-0.0524847	1	1		1.55	1.3	0.197066	0.144581
31080	2	-0.25	4.66667	2.6	3.66667	-0.0731127	1	1		1.55	1.3	0.197066	0.123953
31080	3	0.45	3.66667	2.2	3.16667	-0.00909442	0	0		1.35	1.8	0.10971	0.100616
31080	4	0.65	3.66667	2.6	4	0.046083	0	0		1.35	2	0.10971	0.155793
31081	1	-0.15	3.83333	3.2	3.83333	NaN	1	0		1.35	1.2	NaN	NaN
31081	2	-0.15	3.66667	3	3.83333	NaN	1	0		1.35	1.2	NaN	NaN
31081	3	0	3	3	3	NaN	1	1		1.05	1.05	NaN	NaN
31081	4	0.15	3	3	3	NaN	1	1		1.05	1.2	NaN	NaN
31082	1	-0.35	3.5	3	3	0.108721	1	1		2.1	1.75	0.109112	0.217834
31082	2	-0.5	3.66667	3.2	3.5	0.0442871	1	1		2.1	1.6	0.109112	0.1534
31082	3	0	3.33333	3	3	-0.0103351	1	1		1.2	1.2	0.154521	0.144186
31082	4	0.3	3	2.4	3	0.0242437	1	1		1.2	1.5	0.154521	0.178765
31083	1	-0.05	3.83333	3.2	3.33333	0.226993	0	1		2.6	2.55	0.0860252	0.313018
31083	2	0	3.66667	3	3	0.0178501	0	1		2.6	2.6	0.0860252	0.103875
31083	3	-0.5	3.5	3	3.16667	-0.042827	0	0		2.7	2.2	0.160401	0.117574
31083	4	-0.35	3.5	3	3	0.0525282	0	0		2.7	2.35	0.160401	0.212929
31088	1	-0.35	3	2.6	3	NaN	1	1		1.45	1.1	NaN	NaN
31088	2	-0.4	2.83333	2	3.16667	NaN	1	1		1.45	1.05	NaN	NaN
31088	3	0	3.66667	2.2	3.16667	NaN	1	1		1.05	1.05	NaN	NaN
31088	4	0.25	3.5	1.8	3.33333	NaN	1	1		1.05	1.3	NaN	NaN
31089	1	-0.05	3.16667	3	3.16667	-0.00890248	1	1		1.15	1.1	0.986651	0.977748
31089	2	-0.1	3.16667	3	3.16667	0.479707	1	1		1.15	1.05	0.986651	1.46636
31089	3	0	3	3	3	0.389583	1	1		1	1	0.674709	1.06429
31089	4	0	3	3	3.16667	0.860627	1	1		1	1	0.674709	1.53534
31090	1	0.131579	4	4	3.66667	-0.216082	1	1		1.5	1.63158	1.86688	1.6508
31090	2	-0.35	3	3	3	-0.964559	1	1		1.5	1.15	1.86688	0.902323
31090	3	-0.1	3	3	3	0.27504	1	1		1.2	1.1	1.25533	1.53037
31090	4	-0.0421053	3	3	3	0.550913	1	1		1.2	1.15789	1.25533	1.80625
31091	1	-0.25	4	4	4	-0.0251828	1	1		1.65	1.4	1.00865	0.983462
31091	2	-0.2	4	4	4	0.039952	1	1		1.65	1.45	1.00865	1.0486
31091	3	0	4	4	4	0.223005	1	1		1.45	1.45	0.826271	1.04928
31091	4	0.05	2.83333	2	1.66667	0.253287	1	1		1.45	1.5	0.826271	1.07956
31092	1	-0.35	3.66667	2.8	3.66667	0.0865074	1	1		2.8	2.45	0.865139	0.951646
31092	2	-1.3	3.5	2.4	3.33333	0.127143	1	1		2.8	1.5	0.865139	0.992282
31092	3	-0.1	3.66667	2.8	3.66667	-0.304162	1	1		1.85	1.75	1.38306	1.0789
31092	4	-0.2	3.83333	3.6	3.83333	0.0399886	1	1		1.85	1.65	1.38306	1.42305
31093	1	-0.4	4.33333	3.2	3.33333	NaN	1	1		1.85	1.45	NaN	NaN
31093	2	-0.35	4.66667	3.2	4.16667	NaN	1	1		1.85	1.5	NaN	NaN
31093	3	-0.3	4.33333	3.2	4.16667	NaN	1	1		1.7	1.4	NaN	NaN
31093	4	-0.1	4.83333	3.4	4.66667	NaN	1	0		1.7	1.6	NaN	NaN
31094	1	0.05	3.66667	3.6	3.33333	0.0937807	1	1		1.45	1.5	0.70462	0.7984
31094	2	-0.4	4	3.4	4	-0.0281614	1	1		1.45	1.05	0.70462	0.676458
31094	3	0	3	2	3	-0.0257832	1	1		1.45	1.45	0.481533	0.45575
31094	4	0	3.66667	3	3.16667	-0.0168448	0	1		1.45	1.45	0.481533	0.464688
31095	1	-0.15	3.83333	2.6	3.83333	NaN	1	1		1.6	1.45	NaN	NaN
31095	2	-0.15	3.66667	3	3.83333	NaN	1	1		1.6	1.45	NaN	NaN
31095	3	-0.2	3.66667	2.6	3.83333	NaN	1	1		1.65	1.45	NaN	NaN
31095	4	-0.15	3.83333	3	3.5	NaN	1	1		1.65	1.5	NaN	NaN
31096	1	-0.0833333	3.5	3	3	NaN	1	1		1.83333	1.75	NaN	NaN
31096	2	-0.183333	3.23529	3	3.33333	NaN	1	1		1.83333	1.65	NaN	NaN
31096	3	0.1	3.17647	3	3.16667	NaN	1	1		1.8	1.9	NaN	NaN
31096	4	0.05	3.35294	3.2	3.16667	NaN	1	1		1.8	1.85	NaN	NaN
31097	1	0.25	3.05882	3.2	3	0.00911323	1	1		1.65	1.9	0.492494	0.501607
31097	2	-0.1	3.41176	3.8	3.16667	-0.16247	1	1		1.65	1.55	0.492494	0.330024
31097	3	0	3.11765	3.2	3	0.0568787	1	1		1.5	1.5	0.455574	0.512453
31097	4	0.05	3.05882	3.2	3	-0.0106625	1	1		1.5	1.55	0.455574	0.444911
31098	1	0	3.11765	3	3	-0.0915479	1	1		1.55	1.55	0.501224	0.409676
31098	2	0.1	2.94118	3	2.83333	-0.0739674	1	1		1.55	1.65	0.501224	0.427257
31098	3	-0.1	3.23529	3	3	0.137934	1	1		1.5	1.4	0.428892	0.566825
31098	4	-0.15	3.23529	3	3	0.307742	1	1		1.5	1.35	0.428892	0.736634
31099	1	-0.05	3.5	3	2.83333	-0.0923629	1	1		1.95	1.9	0.428237	0.335874
31099	2	0.05	3.23529	3	3.33333	-0.0811461	1	1		1.95	2	0.428237	0.347091
31099	3	0.7	3.23529	3	3	-0.06956	1	1		1.8	2.5	0.590698	0.521138
31099	4	0.4	3.47059	3	3.33333	-0.238532	1	1		1.8	2.2	0.590698	0.352166
31100	1	0.4	2.41176	1	2.83333	NaN	0	1		1.35	1.75	NaN	NaN
31100	2	0.05	2.58824	1.6	3	NaN	0	1		1.35	1.4	NaN	NaN
31100	3	0.45	2.58824	1.4	3	NaN	0	1		1.25	1.7	NaN	NaN
31100	4	0.3	2.70588	1.8	3	NaN	0	1		1.25	1.55	NaN	NaN
31101	1	-0.3	3.66667	3.8	3.16667	0.281504	1	1		1.4	1.1	0.324276	0.60578
31101	2	-0.05	3	3	2.66667	0.0798054	0	1		1.4	1.35	0.324276	0.404081
31101	3	0	3.58824	3.4	3.66667	-0.0880679	0	1		1	1	0.514021	0.425953
31101	4	0	3.94118	3.6	4.16667	-0.067748	1	1		1	1	0.514021	0.446273
31104	1	0.05	3.66667	2.6	3.16667	0.124844	1	1		1.95	2	0.393119	0.517963
31104	2	0.05	2.94118	2.4	2.83333	0.140235	0	0		1.95	2	0.393119	0.533354
31104	3	-0.05	3.05882	2.6	3	0.45027	1	1		2.05	2	0.645929	1.0962
31104	4	-0.05	3.05882	2.4	3	0.25051	1	1		2.05	2	0.645929	0.896438
31105	1	-0.05	2.88235	2.2	3.16667	-0.0400152	1	1		1.85	1.8	0.514414	0.474399
31105	2	0	2.76471	2	3.33333	0.139459	1	1		1.85	1.85	0.514414	0.653873
31105	3	-0.1	2.82353	2	3.16667	-0.2748	1	1		1.95	1.85	0.675193	0.400394
31105	4	-0.1	2.76471	2	3.16667	-0.141158	1	1		1.95	1.85	0.675193	0.534035
31106	1	0.1	2.52941	2	2.66667	0.214271	1	1		2.15	2.25	0.320581	0.534852
31106	2	0.1	2.52941	2	2.66667	0.267416	0	0		2.15	2.25	0.320581	0.587997
31106	3	0.05	2.64706	2	2.83333	0.0223767	1	1		2	2.05	0.502758	0.525135
31106	4	-0.2	2.64706	2.2	3	0.505601	1	1		2	1.8	0.502758	1.00836
31107	1	-0.05	3.83333	3	2.83333	-0.159233	1	1		1.5	1.45	0.584861	0.425628
31107	2	-0.15	3.23529	2.8	3.16667	-0.222875	1	1		1.5	1.35	0.584861	0.361986
31107	3	0.45	3.11765	2.8	3	0.108025	1	1		1.15	1.6	0.55187	0.659895
31107	4	0	3.23529	2.8	3.33333	0.0188661	1	1		1.15	1.15	0.55187	0.570736
31108	1	0.1	3.33333	2.2	2.83333	-1.41063	1	1		1.7	1.8	2.55784	1.14722
31108	2	-0.15	3.82353	4	3.66667	-1.23331	1	1		1.7	1.55	2.55784	1.32453
31108	3	0.25	2.58824	2	2	0.510615	1	1		1.05	1.3	1.22555	1.73616
31108	4	0.4	3.11765	2.8	2.66667	-0.137133	1	1		1.05	1.45	1.22555	1.08841
31109	1	-0.15	3.41176	3	3.16667	0.191468	0	0		1.85	1.7	0.672788	0.864256
31109	2	-0.35	2.64706	2.4	2.83333	0.100757	0	1		1.85	1.5	0.672788	0.773545
31109	3	0.25	3.05882	2.8	3.5	0.179929	0	1		1.25	1.5	0.801825	0.981754
31109	4	-0.1	3.52941	3.2	3.66667	-0.154415	0	1		1.25	1.15	0.801825	0.647411
31110	1	-0.05	3.05882	2.6	2.83333	-0.229577	1	1		2	1.95	0.936439	0.706863
31110	2	-0.4	3.05882	2.6	2.83333	-0.110996	1	1		2	1.6	0.936439	0.825444
31110	3	-0.05	3.11765	3	3	-0.377874	1	0		1.6	1.55	0.963182	0.585308
31110	4	-0.05	3.11765	3	3	-0.0937229	1	0		1.6	1.55	0.963182	0.869459
31111	1	-0.1	2.83333	1.8	3	-0.125604	0	0		1.35	1.25	1.01454	0.888936
31111	2	-0.35	2.52941	1.4	3	-0.116732	1	0		1.35	1	1.01454	0.897809
31111	3	0.15	2.52941	1.4	3	-0.551223	1	1		1	1.15	1.34938	0.798158
31111	4	0	2.52941	1.4	3	-0.571093	1	1		1	1	1.34938	0.778288
31112	1	0.1	3.16667	3	3	0.283502	1	1		2.1	2.2	0.718966	1.00247
31112	2	0	3.17647	3	3	0.0411567	1	1		2.1	2.1	0.718966	0.760122
31112	3	0	3.11765	3	3	-0.168945	1	1		2.1	2.1	0.931343	0.762398
31112	4	0.1	3.17647	3	3	0.299524	1	1		2.1	2.2	0.931343	1.23087
31113	1	-0.05	3.29412	3.2	3	NaN	1	1		1.95	1.9	NaN	NaN
31113	2	-0.05	3.17647	3	3	NaN	1	0		1.95	1.9	NaN	NaN
31113	3	0	3.35294	3	3	NaN	1	0		1.95	1.95	NaN	NaN
31113	4	0	3.23529	3	3	NaN	1	0		1.95	1.95	NaN	NaN
31114	1	-0.2	3.52941	3.4	3.66667	-0.0143646	1	1		1.2	1	0.307731	0.293366
31114	2	-0.2	3.52941	3.4	4	0.091653	1	1		1.2	1	0.307731	0.399384
31114	3	0	2.64706	2.4	2.83333	0.399823	0	1		1	1	0.45805	0.857873
31114	4	0.15	2.70588	2.4	2.83333	-0.027738	0	1		1	1.15	0.45805	0.430312
31115	1	-0.1	3.5	3	3.5	NaN	1	1		1.6	1.5	NaN	NaN
31115	2	-0.1	3.23529	3	3.5	NaN	0	1		1.6	1.5	NaN	NaN
31115	3	0.05	3.05882	2.2	3.33333	NaN	1	1		1.65	1.7	NaN	NaN
31115	4	-0.35	3.70588	3.8	4	NaN	1	1		1.65	1.3	NaN	NaN
31118	1	-0.2	3.17647	2.6	3	NaN	1	0		1.25	1.05	NaN	NaN
31118	2	-0.25	3.17647	3	3	NaN	1	0		1.25	1	NaN	NaN
31118	3	0	3.11765	3	3	NaN	1	0		1.05	1.05	NaN	NaN
31118	4	-0.05	3.05882	3	3	NaN	1	1		1.05	1	NaN	NaN
31119	1	-0.2	3.17647	3	3.5	0.0963833	1	1		1.75	1.55	0.724039	0.820423
31119	2	-0.65	3.41176	3	3.16667	0.0680674	1	0		1.75	1.1	0.724039	0.792107
31119	3	-0.25	3.52941	3.6	3.33333	-0.236654	1	0		1.45	1.2	1.38719	1.15054
31119	4	0.15	4.23529	4.4	4.16667	-0.065267	1	0		1.45	1.6	1.38719	1.32192
31120	1	-0.1	3.47059	3.6	3.66667	0.208398	1	1		2.05	1.95	1.69453	1.90292
31120	2	-0.2	3.11765	2.4	4	-0.0889336	1	1		2.05	1.85	1.69453	1.60559
31120	3	-0.15	3.29412	2.6	3.83333	-0.646337	1	1		2.1	1.95	1.87056	1.22422
31120	4	-0.4	3.52941	3	4.16667	-0.468561	1	1		2.1	1.7	1.87056	1.402
31121	1	-0.15	2.94118	2.4	3.16667	NaN	0	1		1.65	1.5	NaN	NaN
31121	2	-0.5	3.23529	2.6	3.5	NaN	0	1		1.65	1.15	NaN	NaN
31121	3	-0.45	3.17647	2.4	3.5	NaN	1	1		1.85	1.4	NaN	NaN
31121	4	-0.35	2.76471	2.4	3	NaN	1	1		1.85	1.5	NaN	NaN
31122	1	-0.05	3.11765	2.2	3.33333	-0.510602	1	1		1.7	1.65	1.80158	1.29098
31122	2	0.35	3.11765	3	3	-0.858946	1	1		1.7	2.05	1.80158	0.942635
31122	3	0.2	3.11765	3	3	-0.449138	1	1		2.1	2.3	1.38717	0.938027
31122	4	0.25	3.35294	3	3	-0.347454	1	1		2.1	2.35	1.38717	1.03971
31123	1	0	3.05882	3	3	0.208025	1	0		1.15	1.15	0.867974	1.076
31123	2	0.05	2.41176	1.8	2.16667	-0.0559161	1	0		1.15	1.2	0.867974	0.812057
31123	3	0	3	3	3	-0.0134105	1	1		1	1	0.752991	0.73958
31123	4	0	3.35294	3.4	3.5	0.0857264	1	1		1	1	0.752991	0.838717

## Sheet: Pre -Baseline Div
Subject	Round	STAI	Mayer A	Mayer B	Mayer I	OT	Trust/Mis	Partner Trust/mis		STAI B	STAI Pre	Ot b	Ot pre
31016	1	1.11765	2.66667	2	3	0.657143	1	1		1.7	1.9	0.35	0.23
31016	2	0.911765	3.16667	3.2	3	1.28571	1	1		1.7	1.55	0.35	0.45
31016	3	1.13333	5	5	4.33333	0.967742	1	1		1.5	1.7	0.31	0.3
31016	4	0.9	5	5	4.33333	2.45161	1	1		1.5	1.35	0.31	0.76
31017	1	1.03846	3.33333	2	3.33333	6.67742	1	1		1.3	1.35	0.31	2.07
31017	2	1.07692	3.83333	2.8	3.83333	4.09677	1	0		1.3	1.4	0.31	1.27
31017	3	1	4	3.4	3.5	0.885714	1	1		1.5	1.5	0.35	0.31
31017	4	0.866667	4	3.8	4	2.94286	1	1		1.5	1.3	0.35	1.03
31018	1	1.15	5	5	4.66667	NaN	1	1		1	1.15	NaN	NaN
31018	2	1	3.33333	3	3	NaN	1	1		1	1	NaN	NaN
31018	3	1	5	5	5	NaN	1	1		1	1	NaN	NaN
31018	4	1.05	4.66667	5	5	NaN	1	1		1	1.05	NaN	NaN
31019	1	1	3.33333	3	3	NaN	1	1		1	1	NaN	NaN
31019	2	1	4.16667	3.8	3.66667	NaN	0	1		1	1	NaN	NaN
31019	3	1	4.83333	5	4.33333	NaN	1	1		1	1	NaN	NaN
31019	4	1	4.83333	5	4.33333	NaN	1	1		1	1	NaN	NaN
31020	1	1.125	3.83333	4.6	4.16667	0.446429	1	1		1.2	1.35	0.56	0.25
31020	2	1.125	4	4.8	4	0.803571	1	1		1.2	1.35	0.56	0.45
31020	3	1.03226	2.66667	2.4	3	1.22222	0	1		1.55	1.6	0.45	0.55
31020	4	1.41935	2.66667	2.6	3	1.33333	1	1		1.55	2.2	0.45	0.6
31021	1	1.08696	3.83333	4.6	4	1.23776	1	1		1.15	1.25	1.43	1.77
31021	2	0.913043	4.16667	4.8	4	0.405594	1	1		1.15	1.05	1.43	0.58
31021	3	1	3	3	3	1.19753	1	1		1	1	0.81	0.97
31021	4	1	4	4	3.66667	1.25926	0	1		1	1	0.81	1.02
31022	1	0.74	4.33333	4.8	4.5	NaN	1	1		2.5	1.85	NaN	NaN
31022	2	0.86	5	5	5	NaN	1	1		2.5	2.15	NaN	NaN
31022	3	1.17647	3.5	3	3.16667	NaN	1	0		1.7	2	NaN	NaN
31022	4	1.41176	3.16667	3	3	NaN	1	1		1.7	2.4	NaN	NaN
31023	1	0.928571	4	5	4.5	2.43421	1	1		2.1	1.95	0.76	1.85
31023	2	1.04762	4	5	4.5	1.21053	1	1		2.1	2.2	0.76	0.92
31023	3	1.04444	3	3	3	1.20238	1	1		2.25	2.35	0.84	1.01
31023	4	1.08889	3	3	3	1.44048	1	0		2.25	2.45	0.84	1.21
31024	1	1.75	2.83333	1.6	2.16667	NaN	0	1		1.6	2.8	NaN	NaN
31024	2	1.0625	3.5	1.8	2.83333	NaN	0	1		1.6	1.7	NaN	NaN
31024	3	1.22727	5	5	4.66667	NaN	1	1		1.1	1.35	NaN	NaN
31024	4	1.04545	5	5	4.16667	NaN	1	1		1.1	1.15	NaN	NaN
31025	1	0.825	2.83333	2.2	3.16667	1.18831	1	1		2	1.65	1.54	1.83
31025	2	0.875	3.16667	2.8	3	0.818182	1	1		2	1.75	1.54	1.26
31025	3	0.945946	4.16667	5	4.33333	0.664336	1	1		1.85	1.75	1.43	0.95
31025	4	0.918919	4.83333	5	4	0.741259	1	1		1.85	1.7	1.43	1.06
31026	1	0.952381	5	5	5	1.31944	1	0		1.05	1	0.72	0.95
31026	2	0.952381	4.66667	4.8	5	1.23611	1	0		1.05	1	0.72	0.89
31026	3	1.15	5	5	5	0.866071	1	1		1	1.15	1.12	0.97
31026	4	1	5	5	5	1.97321	1	1		1	1	1.12	2.21
31027	1	1	3	1.6	2.66667	0.860465	1	1		1.5	1.5	0.43	0.37
31027	2	0.933333	3.16667	1.4	2.83333	1.25581	1	1		1.5	1.4	0.43	0.54
31027	3	1	4.33333	4.8	4.5	1.03509	1	1		1.3	1.3	0.57	0.59
31027	4	0.961538	4.5	5	4.33333	0.894737	1	1		1.3	1.25	0.57	0.51
31028	1	1	4.83333	4.6	4.5	NaN	1	1		1.5	1.5	NaN	NaN
31028	2	1	4.66667	5	4.5	NaN	1	1		1.5	1.5	NaN	NaN
31028	3	1	3	3	3	NaN	1	1		1.5	1.5	NaN	NaN
31028	4	1	3	3	3	NaN	1	1		1.5	1.5	NaN	NaN
31029	1	1.02174	4	4.2	4.16667	NaN	1	1		2.3	2.35	NaN	NaN
31029	2	1.02174	3.83333	4.2	3.66667	NaN	1	1		2.3	2.35	NaN	NaN
31029	3	1	3	3	3	NaN	1	1		2.5	2.5	NaN	NaN
31029	4	0.98	3	3	3	NaN	0	1		2.5	2.45	NaN	NaN
31030	1	0.84	3.5	3.2	3.16667	NaN	1	1		1.25	1.05	NaN	NaN
31030	2	0.8	3.16667	3.6	3.33333	NaN	1	1		1.25	1	NaN	NaN
31030	3	1	3	3	3	NaN	1	1		1	1	NaN	NaN
31030	4	1.1	3	3	3	NaN	1	1		1	1.1	NaN	NaN
31031	1	0.882353	3.83333	4	3.66667	1.42202	1	1		1.8	1.58824	1.09	1.55
31031	2	0.771605	4	4	3.66667	2.20183	1	1		1.8	1.38889	1.09	2.4
31031	3	1.05556	4	4	3.66667	0.65311	1	1		1.42105	1.5	4.18	2.73
31031	4	1.26667	4	4	3.66667	0.421053	1	0		1.42105	1.8	4.18	1.76
31032	1	0.884615	3.16667	2.8	2.66667	0.342679	1	1		1.3	1.15	3.21	1.1
31032	2	1	3.16667	3	3	0.218069	0	1		1.3	1.3	3.21	0.7
31032	3	1	4.16667	4	3.66667	1.03226	1	1		1	1	0.93	0.96
31032	4	1	4.66667	5	4.33333	NaN	1	1		1	1	0.93	NaN
31033	1	1	5	3	3	0.909091	0	1		1	1	0.77	0.7
31033	2	1	5	3	3	0.844156	1	0		1	1	0.77	0.65
31033	3	1	5	5	4.33333	1.17391	1	1		1	1	1.38	1.62
31033	4	1	5	5	4.33333	0.42029	1	1		1	1	1.38	0.58
31034	1	0.869565	3.33333	2.4	3	0.965779	1	1		1.15	1	2.63	2.54
31034	2	0.869565	3.16667	3.4	3	0.444867	1	0		1.15	1	2.63	1.17
31034	3	1	4	5	5	0.45283	1	1		1	1	1.59	0.72
31034	4	1	4	5	5	1.27044	1	1		1	1	1.59	2.02
31035	1	1.11111	3.33333	3	3	0.910448	1	0		1.8	2	0.67	0.61
31035	2	1.13889	3.33333	2	2.5	1.86567	0	1		1.8	2.05	0.67	1.25
31035	3	1.28571	4.66667	5	5	0.603571	1	1		1.4	1.8	2.8	1.69
31035	4	1.5	4.66667	5	5	0.65	1	1		1.4	2.1	2.8	1.82
31036	1	1	5	5	5	NaN	1	1		1.2	1.2	NaN	NaN
31036	2	0.916667	5	5	5	NaN	1	1		1.2	1.1	NaN	NaN
31036	3	1.5	3.33333	1.6	2.66667	NaN	0	1		1.3	1.95	NaN	NaN
31036	4	1.07692	4	3	3.5	NaN	1	1		1.3	1.4	NaN	NaN
31037	1	1	4.66667	4.4	4	NaN	1	1		1	1	NaN	NaN
31037	2	1	4.5	4.4	4.5	NaN	1	1		1	1	NaN	NaN
31037	3	1.9	3	2.8	3	NaN	0	1		1	1.9	NaN	NaN
31037	4	1.9	3.16667	3	3.16667	NaN	0	0		1	1.9	NaN	NaN
31038	1	0.973684	3.83333	4.6	3.83333	1.25539	1	1		1.9	1.85	0.125119	0.157073
31038	2	1.05263	4	4.4	3.83333	0.856493	1	1		1.9	2	0.125119	0.107164
31038	3	1	3.83333	2.4	3	0.643098	1	0		2.05	2.05	0.213113	0.137052
31038	4	1.04878	3.66667	2	2.5	NaN	1	1		2.05	2.15	0.213113	NaN
31039	1	1.04348	4.33333	4.4	4.16667	NaN	1	1		1.15	1.2	NaN	NaN
31039	2	1.08696	4.33333	4.8	4.16667	NaN	1	1		1.15	1.25	NaN	NaN
31039	3	1.09091	3.66667	3	3	NaN	1	0		1.1	1.2	NaN	NaN
31039	4	1.04545	3.5	3	3	NaN	0	0		1.1	1.15	NaN	NaN
31040	1	0.952381	3.16667	2.8	2.83333	1.17226	1	1		1.05	1	0.165766	0.19432
31040	2	0.952381	3.16667	3	3	1.10303	1	1		1.05	1	0.165766	0.182845
31040	3	1	4.16667	4.2	4.33333	0.620245	1	1		1	1	0.223029	0.138333
31040	4	1	4.16667	4	4.33333	0.606248	1	1		1	1	0.223029	0.135211
31041	1	1.16667	3	2.6	3.16667	NaN	1	1		1.8	2.1	NaN	NaN
31041	2	1.08333	3	2.6	3	NaN	0	1		1.8	1.95	NaN	NaN
31041	3	1.05714	3.5	4	3.16667	NaN	1	1		1.75	1.85	NaN	NaN
31041	4	1.02857	3.66667	3.6	3.5	NaN	1	1		1.75	1.8	NaN	NaN
31042	1	0.897436	3.16667	2.8	2.83333	1.18121	1	1		1.95	1.75	0.214886	0.253825
31042	2	0.794872	3.16667	3.4	2.83333	0.722363	1	1		1.95	1.55	0.214886	0.155225
31042	3	0.966667	5	5	4.66667	1.64559	1	1		1.5	1.45	0.208797	0.343594
31042	4	1	5	5	4.66667	2.05846	1	1		1.5	1.5	0.208797	0.4298
31043	1	1.02941	3.5	3	3.16667	5.58649	1	1		1.7	1.75	0.0585128	0.326881
31043	2	0.970588	3.33333	3	3	2.73562	1	0		1.7	1.65	0.0585128	0.160069
31043	3	1	4.5	5	5	0.964536	1	1		1.25	1.25	0.249992	0.241127
31043	4	1	4.66667	5	5	0.692297	1	1		1.25	1.25	0.249992	0.173069
31044	1	1	4.83333	4.8	4.33333	2.14933	1	1		1	1	0.127863	0.274819
31044	2	1	4.83333	4.6	4.16667	1.7591	1	1		1	1	0.127863	0.224923
31044	3	1	4	3.6	3.66667	0.793975	1	1		1	1	0.414771	0.329318
31044	4	1	4	3.6	3.66667	1.06016	1	1		1	1	0.414771	0.439723
31045	1	0.764706	4.5	4.4	4	0.833845	1	1		1.7	1.3	0.302085	0.251892
31045	2	0.676471	4.5	4.6	4.33333	0.756624	1	1		1.7	1.15	0.302085	0.228565
31045	3	0.923077	3	3	3	0.628215	1	0		1.3	1.2	0.363832	0.228565
31045	4	1.30769	3	2.2	2.5	0.715133	0	1		1.3	1.7	0.363832	0.260188
31046	1	1.50376	4.33333	5	4.33333	NaN	1	1		1.4	2.10526	NaN	NaN
31046	2	1.32143	4.5	5	4.16667	NaN	1	1		1.4	1.85	NaN	NaN
31046	3	0.938776	3.5	2.8	3	NaN	1	1		2.45	2.3	NaN	NaN
31046	4	0.979592	4.16667	2.6	3	NaN	1	1		2.45	2.4	NaN	NaN
31047	1	1.16667	4.16667	5	5	NaN	1	1		1.5	1.75	NaN	NaN
31047	2	1	4.33333	5	5	NaN	1	1		1.5	1.5	NaN	NaN
31047	3	1.19231	4	1	2.33333	NaN	0	1		2.6	3.1	NaN	NaN
31047	4	0.423077	4.16667	1	2.66667	NaN	1	0		2.6	1.1	NaN	NaN
31048	1	1.11111	4	3.4	3.33333	0.922015	1	1		1.35	1.5	0.302784	0.279171
31048	2	1.03704	3.66667	3.6	3.33333	0.53286	1	1		1.35	1.4	0.302784	0.161341
31048	3	0.821429	4.66667	4.8	4.83333	0.888382	1	1		1.4	1.15	0.186593	0.165766
31048	4	1.07143	4.83333	5	3.66667	0.766147	1	1		1.4	1.5	0.186593	0.142957
31049	1	0.925926	3.16667	3	3	1.46774	1	1		1.35	1.25	0.156147	0.229182
31049	2	0.888889	3	3	3	1.09499	1	1		1.35	1.2	0.156147	0.170979
31049	3	1	3.66667	4	4.16667	0.539404	1	1		1.2	1.2	0.580327	0.313031
31049	4	1	4	4	3.66667	NaN	1	1		1.2	1.2	0.580327	NaN
31050	1	0.729167	3.66667	3.2	3	NaN	1	1		2.4	1.75	NaN	NaN
31050	2	0.6875	3.66667	3.2	3.16667	NaN	1	1		2.4	1.65	NaN	NaN
31050	3	1.14286	4.83333	5	4.83333	NaN	1	1		1.4	1.6	NaN	NaN
31050	4	1.14286	4.83333	5	5	NaN	1	1		1.4	1.6	NaN	NaN
31051	1	1	3.83333	3	3	1.34869	1	1		1.75	1.75	0.478184	0.644922
31051	2	1.05714	4	3	3.5	0.929663	1	1		1.75	1.85	0.478184	0.44455
31051	3	1	5	5	4.83333	0.631929	1	1		1	1	0.41154	0.260064
31051	4	1	5	5	4.83333	0.958666	1	1		1	1	0.41154	0.394529
31052	1	1	3.83333	3.8	3.5	NaN	1	1		1.3	1.3	NaN	NaN
31052	2	1.07692	3.16667	3.4	3.66667	NaN	1	1		1.3	1.4	NaN	NaN
31052	3	1.125	3.66667	2.6	3.16667	NaN	1	1		1.2	1.35	NaN	NaN
31052	4	1	3.5	3.2	3.5	NaN	1	1		1.2	1.2	NaN	NaN
31053	1	0.65625	4.5	4.4	4.16667	NaN	1	1		1.6	1.05	NaN	NaN
31053	2	0.78125	4.5	4.2	4.5	NaN	1	1		1.6	1.25	NaN	NaN
31053	3	1.2381	3.5	1.8	3.16667	NaN	0	1		1.05	1.3	NaN	NaN
31053	4	0.952381	3.66667	2.8	3.5	NaN	1	1		1.05	1	NaN	NaN
31054	1	0.647059	5	5	5	NaN	1	1		1.7	1.1	NaN	NaN
31054	2	0.617647	5	5	5	NaN	1	1		1.7	1.05	NaN	NaN
31054	3	1.08696	3.83333	2.8	3.33333	NaN	1	1		1.15	1.25	NaN	NaN
31054	4	0.869565	4.16667	3.8	3.66667	NaN	1	1		1.15	1	NaN	NaN
31055	1	0.88	4.66667	5	5	NaN	1	1		1.25	1.1	NaN	NaN
31055	2	0.88	4.66667	5	5	NaN	1	1		1.25	1.1	NaN	NaN
31055	3	1.13636	3.5	3	2.83333	NaN	1	0		1.1	1.25	NaN	NaN
31055	4	1.45455	3.66667	3.4	3	NaN	1	1		1.1	1.6	NaN	NaN
31056	1	0.965517	4	2.8	3.5	0.845768	1	1		1.45	1.4	0.382298	0.323335
31056	2	1	3.66667	2.8	3.66667	0.742673	1	1		1.45	1.45	0.382298	0.283923
31056	3	1.04167	4.16667	4.2	4.66667	1.0643	1	1		1.2	1.25	0.455052	0.48431
31056	4	0.875	4.83333	4.6	4.16667	0.91904	1	1		1.2	1.05	0.455052	0.418211
31057	1	0.896552	3.33333	3	2.83333	1.0047	1	1		1.45	1.3	0.389799	0.391632
31057	2	0.758621	3.5	3.4	3.16667	0.705328	1	1		1.45	1.1	0.389799	0.274936
31057	3	0.892857	4.83333	4.4	4.66667	1.77219	1	1		1.4	1.25	0.309971	0.549327
31057	4	0.928571	5	4.6	5	1.0074	1	1		1.4	1.3	0.309971	0.312264
31058	1	1.12245	3	3	2.66667	0.838433	1	1		2.45	2.75	0.554133	0.464603
31058	2	1.02041	3.33333	3.8	3.5	1.04187	1	1		2.45	2.5	0.554133	0.577333
31058	3	0.847826	4.5	5	4.83333	0.990663	1	1		2.3	1.95	0.526974	0.522054
31058	4	0.913043	4.5	5	4.83333	0.852595	1	1		2.3	2.1	0.526974	0.449295
31059	1	0.952381	3.33333	2.8	2.83333	0.608249	1	1		2.1	2	0.553391	0.336599
31059	2	0.952381	3.33333	3	3.16667	0.720132	1	1		2.1	2	0.553391	0.398514
31059	3	0.9375	4.66667	5	3.66667	0.805852	1	1		2.4	2.25	0.429615	0.346206
31059	4	0.854167	5	5	4	0.796191	1	1		2.4	2.05	0.429615	0.342056
31060	1	0.75	4	4	4	NaN	1	1		2	1.5	NaN	NaN
31060	2	0.75	4	4	4	NaN	1	1		2	1.5	NaN	NaN
31060	3	0.842105	3.66667	3.4	3.83333	NaN	1	1		1.9	1.6	NaN	NaN
31060	4	0.842105	4	4	4	NaN	1	1		1.9	1.6	NaN	NaN
31061	1	1	5	3.4	5	0.997323	1	1		1	1	0.378221	0.377209
31061	2	1	4.83333	4	5	0.81462	1	1		1	1	0.378221	0.308107
31061	3	1	3	1	2	0.928946	1	1		1	1	0.377968	0.351112
31061	4	1	3	1	2	1.33749	0	1		1	1	0.377968	0.50553
31062	1	0.84	4.5	4.6	4.16667	NaN	1	1		1.25	1.05	NaN	NaN
31062	2	1.28	4.66667	4.6	4.33333	NaN	1	1		1.25	1.6	NaN	NaN
31062	3	1	4	2.4	2.83333	NaN	1	1		1	1	NaN	NaN
31062	4	1	4.16667	3.6	3.5	NaN	1	1		1	1	NaN	NaN
31063	1	0.947368	4.16667	4.2	3.83333	NaN	1	1		1.9	1.8	NaN	NaN
31063	2	1.02632	4.33333	4	4	NaN	1	1		1.9	1.95	NaN	NaN
31063	3	1.02632	3	3	3	NaN	1	1		1.9	1.95	NaN	NaN
31063	4	1.02632	4	3	3	NaN	1	0		1.9	1.95	NaN	NaN
31064	1	1.18182	3.16667	3.4	3.33333	1.20717	1	1		1.1	1.3	0.99461	1.20067
31064	2	1.13636	3.83333	3.8	3.5	1.32945	1	1		1.1	1.25	0.99461	1.32229
31064	3	1.04545	4.16667	4.4	3.16667	1.66209	1	1		1.1	1.15	1.05502	1.75354
31064	4	1.22727	4.16667	3.8	3.16667	1.99612	1	1		1.1	1.35	1.05502	2.10594
31065	1	1	3	3	3	0.652583	0	1		1	1	1.78881	1.16735
31065	2	1	3	3	3	0.624771	0	0		1	1	1.78881	1.1176
31065	3	1	3.66667	4.8	4.83333	2.26169	1	1		1	1	1.29858	2.93699
31065	4	1	4.16667	5	5	NaN	1	1		1	1	1.29858	52.558
31066	1	0.967742	3	3	3	NaN	1	1		1.55	1.5	NaN	NaN
31066	2	0.935484	3.16667	3	3.16667	NaN	1	1		1.55	1.45	NaN	NaN
31066	3	0.689655	5	4.2	3.83333	NaN	1	1		1.45	1	NaN	NaN
31066	4	0.689655	5	4.4	4.16667	NaN	1	1		1.45	1	NaN	NaN
31067	1	1.03125	3.83333	3.8	4	0.691574	1	0		1.6	1.65	1.77689	1.22885
31067	2	1.5	3.33333	2.8	3.5	0.765732	0	0		1.6	2.4	1.77689	1.36062
31067	3	1	4.66667	4.4	4.16667	1.03326	1	1		1.5	1.5	1.34653	1.39131
31067	4	0.966667	4.5	4.4	3.83333	1.18114	1	1		1.5	1.45	1.34653	1.59044
31068	1	0.764706	4.16667	4.2	4.83333	1.40461	1	1		1.7	1.3	0.281632	0.395581
31068	2	0.647059	4.66667	4.6	5	2.09135	1	1		1.7	1.1	0.281632	0.588989
31068	3	1	3.33333	2.8	2.83333	0.898092	1	1		1.1	1.1	0.282917	0.254085
31068	4	1.00478	3.66667	3	3.5	1.25231	1	1		1.1	1.10526	0.282917	0.354299
31069	1	1	3.83333	3.6	4	0.7602	1	1		1.85	1.85	0.430552	0.327305
31069	2	1	3.83333	3.6	4	1.17816	1	1		1.85	1.85	0.430552	0.507261
31069	3	1.02439	3.5	2.4	3.16667	0.73769	1	1		2.05	2.1	0.524648	0.387027
31069	4	1.04878	3.5	3	2.83333	0.393834	1	1		2.05	2.15	0.524648	0.206624
31070	1	1.1	4.83333	4.8	5	1.12879	1	1		1	1.1	0.177467	0.200323
31070	2	1.05	4.83333	5	4.33333	1.63023	1	1		1	1.05	0.177467	0.289312
31070	3	1.04762	4.16667	3.2	3.66667	0.622155	1	1		1.05	1.1	0.303473	0.188807
31070	4	0.952381	4.66667	4.2	4	0.631289	1	1		1.05	1	0.303473	0.191579
31071	1	1	4.83333	5	5	1.04184	1	1		1	1	0.200506	0.208895
31071	2	1	4.83333	5	4.83333	0.816176	1	1		1	1	0.200506	0.163648
31071	3	1	4	3	3	0.811728	1	1		1	1	0.211769	0.171899
31071	4	1	4.33333	3	3	0.746477	1	1		1	1	0.211769	0.158081
31072	1	0.928571	3.33333	3	3	1.58917	1	1		2.1	1.95	1.37998	2.19302
31072	2	1.02381	3	3	3	2.34624	1	1		2.1	2.15	1.37998	3.23777
31072	3	1.05128	3.83333	4	3.83333	1.25641	1	1		1.95	2.05	1.44401	1.81427
31072	4	1.05128	3.66667	4	3.66667	1.39528	1	1		1.95	2.05	1.44401	2.0148
31073	1	0.8	3.66667	3.8	3.33333	NaN	1	1		1.5	1.2	NaN	NaN
31073	2	0.766667	3.66667	4	3.83333	NaN	1	1		1.5	1.15	NaN	NaN
31073	3	0.923077	5	5	4.83333	NaN	1	1		1.3	1.2	NaN	NaN
31073	4	0.923077	5	5	4.83333	NaN	1	1		1.3	1.2	NaN	NaN
31074	1	1	3.5	2.4	3.16667	2.08464	1	1		2	2	4.71317	9.82526
31074	2	1	3.16667	2.2	3.16667	0.837193	1	1		2	2	4.71317	3.94583
31074	3	0.97561	4	4.8	4.16667	NaN	1	1		2.05	2	3.70969	NA
31074	4	0.97561	4.16667	5	3.66667	1.51645	1	1		2.05	2	3.70969	5.62555
31075	1	0.939394	3	3	3	0.826678	1	1		1.65	1.55	5.08074	4.20013
31075	2	0.848485	3.66667	3.4	3.16667	0.846582	1	1		1.65	1.4	5.08074	4.30126
31075	3	0.807692	5	5	3.83333	1.44383	1	1		1.3	1.05	0.937481	1.35356
31075	4	0.890688	5	5	4	2.39026	1	1		1.3	1.15789	0.937481	2.24082
31076	1	0.909091	5	5	5	NaN	1	1		1.1	1	NaN	NaN
31076	2	0.909091	5	5	5	NaN	1	1		1.1	1	NaN	NaN
31076	3	1	3.5	3	3.83333	NaN	1	1		1	1	NaN	NaN
31076	4	1	4	3	4	NaN	0	1		1	1	NaN	NaN
31077	1	0.869565	5	5	5	NaN	1	1		1.15	1	NaN	NaN
31077	2	1.17391	5	5	5	NaN	1	1		1.15	1.35	NaN	NaN
31077	3	1.17391	3	1.4	2.66667	NaN	0	1		1.15	1.35	NaN	NaN
31077	4	1.34783	3.66667	3.4	4.5	NaN	0	1		1.15	1.55	NaN	NaN
31078	1	0.862069	5	5	4.33333	0.794877	1	1		1.45	1.25	2.46994	1.9633
31078	2	1.2069	5	5	4.33333	0.864436	1	1		1.45	1.75	2.46994	2.1351
31078	3	0.793103	4	4	3.66667	0.848456	1	1		1.45	1.15	2.4303	2.062
31078	4	0.793103	4	4	3.66667	0.841394	1	0		1.45	1.15	2.4303	2.04484
31079	1	0.645161	4.83333	5	5	NaN	1	1		1.55	1	NaN	NaN
31079	2	0.709677	4.83333	5	5	NaN	1	1		1.55	1.1	NaN	NaN
31079	3	1.6	3.16667	3	3	NaN	1	0		1.25	2	NaN	NaN
31079	4	0.8	3.66667	3.6	3.33333	NaN	1	0		1.25	1	NaN	NaN
31080	1	0.83871	3.83333	2.2	3.5	0.733669	1	1		1.55	1.3	0.197066	0.144581
31080	2	0.83871	4.66667	2.6	3.66667	0.628993	1	1		1.55	1.3	0.197066	0.123953
31080	3	1.33333	3.66667	2.2	3.16667	0.917105	0	0		1.35	1.8	0.10971	0.100616
31080	4	1.48148	3.66667	2.6	4	1.42004	0	0		1.35	2	0.10971	0.155793
31081	1	0.888889	3.83333	3.2	3.83333	NaN	1	0		1.35	1.2	NaN	NaN
31081	2	0.888889	3.66667	3	3.83333	NaN	1	0		1.35	1.2	NaN	NaN
31081	3	1	3	3	3	NaN	1	1		1.05	1.05	NaN	NaN
31081	4	1.14286	3	3	3	NaN	1	1		1.05	1.2	NaN	NaN
31082	1	0.833333	3.5	3	3	1.99642	1	1		2.1	1.75	0.109112	0.217834
31082	2	0.761905	3.66667	3.2	3.5	1.40589	1	1		2.1	1.6	0.109112	0.1534
31082	3	1	3.33333	3	3	0.933115	1	1		1.2	1.2	0.154521	0.144186
31082	4	1.25	3	2.4	3	1.1569	1	1		1.2	1.5	0.154521	0.178765
31083	1	0.980769	3.83333	3.2	3.33333	3.63868	0	1		2.6	2.55	0.0860252	0.313018
31083	2	1	3.66667	3	3	1.2075	0	1		2.6	2.6	0.0860252	0.103875
31083	3	0.814815	3.5	3	3.16667	0.733001	0	0		2.7	2.2	0.160401	0.117574
31083	4	0.87037	3.5	3	3	1.32748	0	0		2.7	2.35	0.160401	0.212929
31088	1	0.758621	3	2.6	3	NaN	1	1		1.45	1.1	NaN	NaN
31088	2	0.724138	2.83333	2	3.16667	NaN	1	1		1.45	1.05	NaN	NaN
31088	3	1	3.66667	2.2	3.16667	NaN	1	1		1.05	1.05	NaN	NaN
31088	4	1.2381	3.5	1.8	3.33333	NaN	1	1		1.05	1.3	NaN	NaN
31089	1	0.956522	3.16667	3	3.16667	0.990977	1	1		1.15	1.1	0.986651	0.977748
31089	2	0.913043	3.16667	3	3.16667	1.4862	1	1		1.15	1.05	0.986651	1.46636
31089	3	1	3	3	3	1.57741	1	1		1	1	0.674709	1.06429
31089	4	1	3	3	3.16667	2.27555	1	1		1	1	0.674709	1.53534
31090	1	1.08772	4	4	3.66667	0.884255	1	1		1.5	1.63158	1.86688	1.6508
31090	2	0.766667	3	3	3	0.483332	1	1		1.5	1.15	1.86688	0.902323
31090	3	0.916667	3	3	3	1.2191	1	1		1.2	1.1	1.25533	1.53037
31090	4	0.964912	3	3	3	1.43886	1	1		1.2	1.15789	1.25533	1.80625
31091	1	0.848485	4	4	4	0.975033	1	1		1.65	1.4	1.00865	0.983462
31091	2	0.878788	4	4	4	1.03961	1	1		1.65	1.45	1.00865	1.0486
31091	3	1	4	4	4	1.26989	1	1		1.45	1.45	0.826271	1.04928
31091	4	1.03448	2.83333	2	1.66667	1.30654	1	1		1.45	1.5	0.826271	1.07956
31092	1	0.875	3.66667	2.8	3.66667	1.09999	1	1		2.8	2.45	0.865139	0.951646
31092	2	0.535714	3.5	2.4	3.33333	1.14696	1	1		2.8	1.5	0.865139	0.992282
31092	3	0.945946	3.66667	2.8	3.66667	0.78008	1	1		1.85	1.75	1.38306	1.0789
31092	4	0.891892	3.83333	3.6	3.83333	1.02891	1	1		1.85	1.65	1.38306	1.42305
31093	1	0.783784	4.33333	3.2	3.33333	NaN	1	1		1.85	1.45	NaN	NaN
31093	2	0.810811	4.66667	3.2	4.16667	NaN	1	1		1.85	1.5	NaN	NaN
31093	3	0.823529	4.33333	3.2	4.16667	NaN	1	1		1.7	1.4	NaN	NaN
31093	4	0.941176	4.83333	3.4	4.66667	NaN	1	0		1.7	1.6	NaN	NaN
31094	1	1.03448	3.66667	3.6	3.33333	1.13309	1	1		1.45	1.5	0.70462	0.7984
31094	2	0.724138	4	3.4	4	0.960033	1	1		1.45	1.05	0.70462	0.676458
31094	3	1	3	2	3	0.946456	1	1		1.45	1.45	0.481533	0.45575
31094	4	1	3.66667	3	3.16667	0.965018	0	1		1.45	1.45	0.481533	0.464688
31095	1	0.90625	3.83333	2.6	3.83333	NaN	1	1		1.6	1.45	NaN	NaN
31095	2	0.90625	3.66667	3	3.83333	NaN	1	1		1.6	1.45	NaN	NaN
31095	3	0.878788	3.66667	2.6	3.83333	NaN	1	1		1.65	1.45	NaN	NaN
31095	4	0.909091	3.83333	3	3.5	NaN	1	1		1.65	1.5	NaN	NaN
31096	1	0.954545	3.5	3	3	NaN	1	1		1.83333	1.75	NaN	NaN
31096	2	0.9	3.23529	3	3.33333	NaN	1	1		1.83333	1.65	NaN	NaN
31096	3	1.05556	3.17647	3	3.16667	NaN	1	1		1.8	1.9	NaN	NaN
31096	4	1.02778	3.35294	3.2	3.16667	NaN	1	1		1.8	1.85	NaN	NaN
31097	1	1.15152	3.05882	3.2	3	1.0185	1	1		1.65	1.9	0.492494	0.501607
31097	2	0.939394	3.41176	3.8	3.16667	0.670108	1	1		1.65	1.55	0.492494	0.330024
31097	3	1	3.11765	3.2	3	1.12485	1	1		1.5	1.5	0.455574	0.512453
31097	4	1.03333	3.05882	3.2	3	0.976595	1	1		1.5	1.55	0.455574	0.444911
31098	1	1	3.11765	3	3	0.817351	1	1		1.55	1.55	0.501224	0.409676
31098	2	1.06452	2.94118	3	2.83333	0.852426	1	1		1.55	1.65	0.501224	0.427257
31098	3	0.933333	3.23529	3	3	1.3216	1	1		1.5	1.4	0.428892	0.566825
31098	4	0.9	3.23529	3	3	1.71753	1	1		1.5	1.35	0.428892	0.736634
31099	1	0.974359	3.5	3	2.83333	0.784318	1	1		1.95	1.9	0.428237	0.335874
31099	2	1.02564	3.23529	3	3.33333	0.810511	1	1		1.95	2	0.428237	0.347091
31099	3	1.38889	3.23529	3	3	0.882241	1	1		1.8	2.5	0.590698	0.521138
31099	4	1.22222	3.47059	3	3.33333	0.596186	1	1		1.8	2.2	0.590698	0.352166
31100	1	1.2963	2.41176	1	2.83333	NaN	0	1		1.35	1.75	NaN	NaN
31100	2	1.03704	2.58824	1.6	3	NaN	0	1		1.35	1.4	NaN	NaN
31100	3	1.36	2.58824	1.4	3	NaN	0	1		1.25	1.7	NaN	NaN
31100	4	1.24	2.70588	1.8	3	NaN	0	1		1.25	1.55	NaN	NaN
31101	1	0.785714	3.66667	3.8	3.16667	1.8681	1	1		1.4	1.1	0.324276	0.60578
31101	2	0.964286	3	3	2.66667	1.2461	0	1		1.4	1.35	0.324276	0.404081
31101	3	1	3.58824	3.4	3.66667	0.828669	0	1		1	1	0.514021	0.425953
31101	4	1	3.94118	3.6	4.16667	0.8682	1	1		1	1	0.514021	0.446273
31104	1	1.02564	3.66667	2.6	3.16667	1.31757	1	1		1.95	2	0.393119	0.517963
31104	2	1.02564	2.94118	2.4	2.83333	1.35672	0	0		1.95	2	0.393119	0.533354
31104	3	0.97561	3.05882	2.6	3	1.69709	1	1		2.05	2	0.645929	1.0962
31104	4	0.97561	3.05882	2.4	3	1.38783	1	1		2.05	2	0.645929	0.896438
31105	1	0.972973	2.88235	2.2	3.16667	0.922212	1	1		1.85	1.8	0.514414	0.474399
31105	2	1	2.76471	2	3.33333	1.2711	1	1		1.85	1.85	0.514414	0.653873
31105	3	0.948718	2.82353	2	3.16667	0.593006	1	1		1.95	1.85	0.675193	0.400394
31105	4	0.948718	2.76471	2	3.16667	0.790937	1	1		1.95	1.85	0.675193	0.534035
31106	1	1.04651	2.52941	2	2.66667	1.66838	1	1		2.15	2.25	0.320581	0.534852
31106	2	1.04651	2.52941	2	2.66667	1.83416	0	0		2.15	2.25	0.320581	0.587997
31106	3	1.025	2.64706	2	2.83333	1.04451	1	1		2	2.05	0.502758	0.525135
31106	4	0.9	2.64706	2.2	3	2.00566	1	1		2	1.8	0.502758	1.00836
31107	1	0.966667	3.83333	3	2.83333	0.727742	1	1		1.5	1.45	0.584861	0.425628
31107	2	0.9	3.23529	2.8	3.16667	0.618926	1	1		1.5	1.35	0.584861	0.361986
31107	3	1.3913	3.11765	2.8	3	1.19574	1	1		1.15	1.6	0.55187	0.659895
31107	4	1	3.23529	2.8	3.33333	1.03419	1	1		1.15	1.15	0.55187	0.570736
31108	1	1.05882	3.33333	2.2	2.83333	0.448509	1	1		1.7	1.8	2.55784	1.14722
31108	2	0.911765	3.82353	4	3.66667	0.517832	1	1		1.7	1.55	2.55784	1.32453
31108	3	1.2381	2.58824	2	2	1.41664	1	1		1.05	1.3	1.22555	1.73616
31108	4	1.38095	3.11765	2.8	2.66667	0.888105	1	1		1.05	1.45	1.22555	1.08841
31109	1	0.918919	3.41176	3	3.16667	1.28459	0	0		1.85	1.7	0.672788	0.864256
31109	2	0.810811	2.64706	2.4	2.83333	1.14976	0	1		1.85	1.5	0.672788	0.773545
31109	3	1.2	3.05882	2.8	3.5	1.2244	0	1		1.25	1.5	0.801825	0.981754
31109	4	0.92	3.52941	3.2	3.66667	0.807421	0	1		1.25	1.15	0.801825	0.647411
31110	1	0.975	3.05882	2.6	2.83333	0.754841	1	1		2	1.95	0.936439	0.706863
31110	2	0.8	3.05882	2.6	2.83333	0.881471	1	1		2	1.6	0.936439	0.825444
31110	3	0.96875	3.11765	3	3	0.607682	1	0		1.6	1.55	0.963182	0.585308
31110	4	0.96875	3.11765	3	3	0.902694	1	0		1.6	1.55	0.963182	0.869459
31111	1	0.925926	2.83333	1.8	3	0.876196	0	0		1.35	1.25	1.01454	0.888936
31111	2	0.740741	2.52941	1.4	3	0.884941	1	0		1.35	1	1.01454	0.897809
31111	3	1.15	2.52941	1.4	3	0.5915	1	1		1	1.15	1.34938	0.798158
31111	4	1	2.52941	1.4	3	0.576774	1	1		1	1	1.34938	0.778288
31112	1	1.04762	3.16667	3	3	1.39432	1	1		2.1	2.2	0.718966	1.00247
31112	2	1	3.17647	3	3	1.05724	1	1		2.1	2.1	0.718966	0.760122
31112	3	1	3.11765	3	3	0.818601	1	1		2.1	2.1	0.931343	0.762398
31112	4	1.04762	3.17647	3	3	1.3216	1	1		2.1	2.2	0.931343	1.23087
31113	1	0.974359	3.29412	3.2	3	NaN	1	1		1.95	1.9	NaN	NaN
31113	2	0.974359	3.17647	3	3	NaN	1	0		1.95	1.9	NaN	NaN
31113	3	1	3.35294	3	3	NaN	1	0		1.95	1.95	NaN	NaN
31113	4	1	3.23529	3	3	NaN	1	0		1.95	1.95	NaN	NaN
31114	1	0.833333	3.52941	3.4	3.66667	0.953321	1	1		1.2	1	0.307731	0.293366
31114	2	0.833333	3.52941	3.4	4	1.29784	1	1		1.2	1	0.307731	0.399384
31114	3	1	2.64706	2.4	2.83333	1.87288	0	1		1	1	0.45805	0.857873
31114	4	1.15	2.70588	2.4	2.83333	0.939443	0	1		1	1.15	0.45805	0.430312
31115	1	0.9375	3.5	3	3.5	NaN	1	1		1.6	1.5	NaN	NaN
31115	2	0.9375	3.23529	3	3.5	NaN	0	1		1.6	1.5	NaN	NaN
31115	3	1.0303	3.05882	2.2	3.33333	NaN	1	1		1.65	1.7	NaN	NaN
31115	4	0.787879	3.70588	3.8	4	NaN	1	1		1.65	1.3	NaN	NaN
31118	1	0.84	3.17647	2.6	3	NaN	1	0		1.25	1.05	NaN	NaN
31118	2	0.8	3.17647	3	3	NaN	1	0		1.25	1	NaN	NaN
31118	3	1	3.11765	3	3	NaN	1	0		1.05	1.05	NaN	NaN
31118	4	0.952381	3.05882	3	3	NaN	1	1		1.05	1	NaN	NaN
31119	1	0.885714	3.17647	3	3.5	1.13312	1	1		1.75	1.55	0.724039	0.820423
31119	2	0.628571	3.41176	3	3.16667	1.09401	1	0		1.75	1.1	0.724039	0.792107
31119	3	0.827586	3.52941	3.6	3.33333	0.8294	1	0		1.45	1.2	1.38719	1.15054
31119	4	1.10345	4.23529	4.4	4.16667	0.95295	1	0		1.45	1.6	1.38719	1.32192
31120	1	0.95122	3.47059	3.6	3.66667	1.12298	1	1		2.05	1.95	1.69453	1.90292
31120	2	0.902439	3.11765	2.4	4	0.947517	1	1		2.05	1.85	1.69453	1.60559
31120	3	0.928571	3.29412	2.6	3.83333	0.654469	1	1		2.1	1.95	1.87056	1.22422
31120	4	0.809524	3.52941	3	4.16667	0.749508	1	1		2.1	1.7	1.87056	1.402
31121	1	0.909091	2.94118	2.4	3.16667	NaN	0	1		1.65	1.5	NaN	NaN
31121	2	0.69697	3.23529	2.6	3.5	NaN	0	1		1.65	1.15	NaN	NaN
31121	3	0.756757	3.17647	2.4	3.5	NaN	1	1		1.85	1.4	NaN	NaN
31121	4	0.810811	2.76471	2.4	3	NaN	1	1		1.85	1.5	NaN	NaN
31122	1	0.970588	3.11765	2.2	3.33333	0.716581	1	1		1.7	1.65	1.80158	1.29098
31122	2	1.20588	3.11765	3	3	0.523227	1	1		1.7	2.05	1.80158	0.942635
31122	3	1.09524	3.11765	3	3	0.676219	1	1		2.1	2.3	1.38717	0.938027
31122	4	1.11905	3.35294	3	3	0.749522	1	1		2.1	2.35	1.38717	1.03971
31123	1	1	3.05882	3	3	1.23967	1	0		1.15	1.15	0.867974	1.076
31123	2	1.04348	2.41176	1.8	2.16667	0.935579	1	0		1.15	1.2	0.867974	0.812057
31123	3	1	3	3	3	0.98219	1	1		1	1	0.752991	0.73958
31123	4	1	3.35294	3.4	3.5	1.11385	1	1		1	1	0.752991	0.838717

## Sheet: Post - Raw
Subject	Round	STAI	Mayer A	Mayer B	Mayer I	OT	Trust/Mis	Partner Trust/mis
31016	1	1.75	3.16667	3.2	3	0.22	1	1
31016	2	1.4	3.16667	3	2.83333	0.47	1	1
31016	3	1.65	5	5	4.33333	0.4	1	1
31016	4	1.25	5	4.8	4	0.32	1	1
31017	1	1.35	3.83333	3	3.66667	0.57	1	1
31017	2	1.55	3	2	3.33333	0.62	1	0
31017	3	1.5	4	3.8	4	0.32	1	1
31017	4	1.45	4	4	3.83333	0.27	1	1
31018	1	1	3.33333	3	3	NaN	1	1
31018	2	1	3.33333	3	3	NaN	1	1
31018	3	1	3.83333	4.4	4.83333	NaN	1	1
31018	4	1.05	4.83333	5	5	NaN	1	1
31019	1	1	4	3.2	3.5	NaN	1	1
31019	2	2	4	3.8	3.33333	NaN	0	1
31019	3	1	4.83333	5	4.33333	NaN	1	1
31019	4	1	5	5	4.33333	NaN	1	1
31020	1	1.2	4	4.6	3.83333	0.34	1	1
31020	2	1.35	4	4.8	4.33333	0.57	1	1
31020	3	1.9	3	2.4	3.16667	0.92	0	1
31020	4	1.55	2.66667	2.4	3.5	1.46	1	1
31021	1	1.15	4.16667	4.8	4	0.64	1	1
31021	2	1.05	4.16667	4.8	3.83333	2.18	1	1
31021	3	1	4	4	3.5	1.4	1	1
31021	4	1	3	3	3	0.88	0	1
31022	1	2.1	4.83333	5	4.5	NaN	1	1
31022	2	1.4	5	5	4.83333	NaN	1	1
31022	3	2.95	3	3	3	NaN	1	0
31022	4	1.85	3.5	3	3.16667	NaN	1	1
31023	1	2.1	4	5	4.16667	0.82	1	1
31023	2	2.35	4	5	4.5	0.95	1	1
31023	3	2.45	3	3	3	1.08	1	1
31023	4	2.7	3	1	2	2.04	1	0
31024	1	2.55	4.16667	3.8	3.66667	NaN	0	1
31024	2	2.6	4.83333	3.8	4.66667	NaN	0	1
31024	3	1	3	5	4.33333	NaN	1	1
31024	4	1	5	5	5	NaN	1	1
31025	1	1.7	3	2.8	3.16667	1.28	1	1
31025	2	1.6	3.16667	3	3	1.05	1	1
31025	3	1.9	4.16667	5	3.66667	1.21	1	1
31025	4	1.7	4.16667	5	4.5	1.21	1	1
31026	1	1	5	5	5	0.86	1	0
31026	2	1	4.5	4.8	5	0.96	1	0
31026	3	1	5	5	5	0.84	1	1
31026	4	1	5	5	5	NaN	1	1
31027	1	1.5	3	1.4	2.66667	0.33	1	1
31027	2	1.4	3	1.4	2.83333	0.56	1	1
31027	3	1.3	4.66667	5	4.33333	0.39	1	1
31027	4	1.3	4.5	5	4.33333	0.68	1	1
31028	1	1.4	4.66667	4.4	4	NaN	1	1
31028	2	1.5	4.83333	4.8	4.5	NaN	1	1
31028	3	1.5	3	3	3	NaN	1	1
31028	4	1.5	3	3	3	NaN	1	1
31029	1	2.35	3.83333	4.6	3.83333	NaN	1	1
31029	2	2.45	4	4.2	3.66667	NaN	1	1
31029	3	2.45	3	3	3	NaN	1	1
31029	4	2.45	3	3	3	NaN	0	1
31030	1	1	3.33333	3.2	3.33333	NaN	1	1
31030	2	1	3.33333	3.4	3.33333	NaN	1	1
31030	3	1.15	3	3	3	NaN	1	1
31030	4	1	3	3.4	4	NaN	1	1
31031	1	1.3	4	4	3.66667	1.59	1	1
31031	2	1.5	4	4	3.66667	1.79	1	1
31031	3	1.5	4	4	3.66667	1.51	1	1
31031	4	1.6	4	4	3.66667	1.88	1	0
31032	1	1	3.16667	2.8	3.16667	0.71	1	1
31032	2	1.5	3.16667	3	3	1.62	0	1
31032	3	1.1	4.16667	4.6	3.66667	NaN	1	1
31032	4	1.15	4.83333	5	4.33333	NaN	1	1
31033	1	1	4	3	3	1.11	0	1
31033	2	1	3.33333	3	3	1.33	1	0
31033	3	1	5	5	4.33333	1.85	1	1
31033	4	1	5	5	4.33333	1.98	1	1
31034	1	1	3.16667	3.2	3.33333	1.13	1	1
31034	2	1	3.16667	3.2	3	0.76	1	0
31034	3	1	4	5	5	1.35	1	1
31034	4	1	4	5	5	0.89	1	1
31035	1	2.05	3.16667	2.4	2.83333	0.8	1	0
31035	2	2.15	3.5	2.2	2.66667	1.37	0	1
31035	3	2	4.66667	5	5	1.54	1	1
31035	4	1.45	4.66667	5	5	1.56	1	1
31036	1	1.15	5	5	5	NaN	1	1
31036	2	1.1	5	5	5	NaN	1	1
31036	3	2.1	4	3.4	3.33333	NaN	0	1
31036	4	1.1	4.33333	3.2	2.83333	NaN	1	1
31037	1	1	4.66667	4.4	4.5	NaN	1	1
31037	2	1	4.5	4.2	4.5	NaN	1	1
31037	3	2.4	3.33333	3	3.5	NaN	0	1
31037	4	1.65	3	3	3	NaN	0	0
31038	1	1.9	4	4.4	3.5	0.189648	1	1
31038	2	1.95	4	4.4	3.66667	0.109479	1	1
31038	3	2.15	3.83333	2	3	0.0801217	1	0
31038	4	2.05	3.5	2.6	3	0.091262	1	1
31039	1	1.15	4.33333	4.6	4.16667	NaN	1	1
31039	2	1.1	4.5	4.8	4.33333	NaN	1	1
31039	3	1.2	3.5	3	3	NaN	1	0
31039	4	1.1	3.5	3	3	NaN	0	0
31040	1	1	3.33333	3	3	0.143818	1	1
31040	2	1	3.16667	3	3	0.119916	1	1
31040	3	1	4.16667	4.2	4.33333	0.152199	1	1
31040	4	1	4	4	4.33333	0.101348	1	1
31041	1	1.85	3	2.6	2.83333	NaN	1	1
31041	2	2	3	3	3	NaN	0	1
31041	3	1.65	3.5	4	3.16667	NaN	1	1
31041	4	1.6	4	3.8	3.33333	NaN	1	1
31042	1	1.6	3.16667	3.4	3.16667	0.182118	1	1
31042	2	1.7	3.33333	3.6	2.83333	0.167314	1	1
31042	3	1.55	5	5	4.66667	0.163954	1	1
31042	4	1.5	5	5	4.66667	0.162111	1	1
31043	1	1.7	3.33333	3.4	3.5	0.0927893	1	1
31043	2	1.75	3.16667	3	3	0.174728	1	0
31043	3	1.4	4.5	5	5	0.212897	1	1
31043	4	1.25	4.83333	5	5	0.319177	1	1
31044	1	1	4.83333	4.6	3.83333	0.194649	1	1
31044	2	1	4.83333	4.6	4.16667	NaN	1	1
31044	3	1	4	3.6	3.66667	0.355953	1	1
31044	4	1	4	3.6	3.66667	NaN	1	1
31045	1	1.35	4.5	4.4	4.16667	0.255158	1	1
31045	2	1.2	4.66667	4.8	4.66667	0.194978	1	1
31045	3	1.55	3	2.2	2.5	0.311683	1	0
31045	4	1.15	3	3	3	0.207852	0	1
31046	1	1.2	4.5	5	4.33333	NaN	1	1
31046	2	1.35	4.83333	5	4.5	NaN	1	1
31046	3	2.15	4	3.4	3.33333	NaN	1	1
31046	4	2.35	3	2.6	3	NaN	1	1
31047	1	1.1	4.33333	5	5	NaN	1	1
31047	2	1.1	4.33333	5	5	NaN	1	1
31047	3	3.55	4	1.8	3	NaN	0	1
31047	4	1	3.83333	1	3	NaN	1	0
31048	1	1.35	4	3.4	3.33333	0.176797	1	1
31048	2	1.4	3.66667	4.2	3.5	0.323029	1	1
31048	3	1.25	4.83333	5	4.5	0.184241	1	1
31048	4	1.15	4.83333	5	4.33333	0.133653	1	1
31049	1	1.25	3.16667	3	3	0.183604	1	1
31049	2	1.25	3	3	3	0.260345	1	1
31049	3	1.2	3.83333	4	4.33333	NaN	1	1
31049	4	1.3	4	4	4.16667	0.387681	1	1
31050	1	1.5	3.5	3.6	3	NaN	1	1
31050	2	1.45	3.66667	3.4	3.83333	NaN	1	1
31050	3	1.25	4.83333	5	5	NaN	1	1
31050	4	1.3	4.83333	5	5	NaN	1	1
31051	1	1.75	3.66667	3.2	3.33333	0.50262	1	1
31051	2	1.45	4	3.6	3.83333	0.24616	1	1
31051	3	1	5	5	4.83333	0.371939	1	1
31051	4	1	5	5	5	0.610263	1	1
31052	1	1.3	3.5	3.4	3.83333	NaN	1	1
31052	2	1.6	3.5	3.6	3.66667	NaN	1	1
31052	3	1.3	3.5	3	3.16667	NaN	1	1
31052	4	1.25	4	3.6	4	NaN	1	1
31053	1	1.2	4.33333	4.4	4.5	NaN	1	1
31053	2	1.4	4.16667	4.2	4.5	NaN	1	1
31053	3	1.35	3.5	2.2	3.16667	NaN	0	1
31053	4	1	3.83333	2.8	3.5	NaN	1	1
31054	1	1.15	5	5	5	NaN	1	1
31054	2	1.05	5	5	5	NaN	1	1
31054	3	1	4.16667	3	3.5	NaN	1	1
31054	4	1	4.33333	3.8	3.83333	NaN	1	1
31055	1	1.1	4.66667	5	5	NaN	1	1
31055	2	1.1	4.66667	5	5	NaN	1	1
31055	3	1.5	3.16667	2.6	2.83333	NaN	1	0
31055	4	1.3	3.5	3	3.16667	NaN	1	1
31056	1	1.2	3.66667	2.8	3.66667	0.25902	1	1
31056	2	1.25	3.66667	2.8	4.16667	0.269104	1	1
31056	3	1.1	4.83333	4.6	4.16667	0.330564	1	1
31056	4	1	4.83333	5	4.16667	0.358481	1	1
31057	1	1.25	3.5	3.4	3.16667	0.523634	1	1
31057	2	1.25	3.33333	3.2	3.5	0.578036	1	1
31057	3	1.25	4.83333	4.4	4.83333	0.508248	1	1
31057	4	1.1	5	4.6	5	0.474036	1	1
31058	1	2.15	3.16667	4	3.5	0.505869	1	1
31058	2	2.45	3.16667	4	3.5	0.477223	1	1
31058	3	2.4	4.83333	5	4.5	0.423853	1	1
31058	4	2.3	4.83333	5	4.83333	0.502491	1	1
31059	1	2	3.5	3	3.66667	0.489858	1	1
31059	2	2	3	3	3.33333	0.487893	1	1
31059	3	2.15	4.5	5	3.5	0.327039	1	1
31059	4	2.1	5	5	4.33333	0.37469	1	1
31060	1	1.7	4	4	4	NaN	1	1
31060	2	1.35	4	4	4	NaN	1	1
31060	3	1.6	4	4	4	NaN	1	1
31060	4	1.5	4	4	4	NaN	1	1
31061	1	1	4.83333	3.6	5	0.515104	1	1
31061	2	1	4.83333	3.8	5	0.721549	1	1
31061	3	1	3	1	1.33333	0.729326	1	1
31061	4	1	3	1	2	0.376704	0	1
31062	1	1	4.83333	4.8	3.83333	NaN	1	1
31062	2	1	5	4.8	4.66667	NaN	1	1
31062	3	1	4.33333	3.4	4	NaN	1	1
31062	4	1	4.5	4	4.16667	NaN	1	1
31063	1	1.9	4	4.4	4.33333	NaN	1	1
31063	2	1.85	4.16667	4.2	3.5	NaN	1	1
31063	3	1.95	3.83333	3	3.16667	NaN	1	1
31063	4	2.05	4	3	3	NaN	1	0
31064	1	1.15	3.5	3.6	3	1.28646	1	1
31064	2	1.2	3.5	3.6	3.16667	1.9321	1	1
31064	3	1.2	4.16667	4	3.33333	1.34997	1	1
31064	4	1.25	4.16667	4	3.16667	2.42575	1	1
31065	1	1	3	3	3	1.63083	0	1
31065	2	1	3	3	3	1.34914	0	0
31065	3	1	4.33333	5	5	1.16501	1	1
31065	4	1	4	5	5	39.1382	1	1
31066	1	1.5	3.16667	3	3.33333	NaN	1	1
31066	2	1.45	3.33333	3.2	3.33333	NaN	1	1
31066	3	1.05	5	4.4	4.16667	NaN	1	1
31066	4	1	5	4.6	4.16667	NaN	1	1
31067	1	1.9	4.33333	4.2	3.83333	1.33375	1	0
31067	2	1.7	3.33333	2.6	3.16667	1.60839	0	0
31067	3	1.65	4.33333	4.4	3.83333	1.32075	1	1
31067	4	1.45	4.83333	3.8	4	1.39776	1	1
31068	1	1.1	4.83333	5	5	0.324633	1	1
31068	2	1.2	4.66667	5	5	0.257581	1	1
31068	3	1.15	3.66667	3	3.33333	0.276799	1	1
31068	4	1.1	3.5	3	4	0.318193	1	1
31069	1	1.8	3.83333	3.8	4	0.478099	1	1
31069	2	2.05	3.83333	4	4	0.922013	1	1
31069	3	1.9	3.33333	3.4	3	0.306249	1	1
31069	4	1.85	3.66667	3.6	4	0.280863	1	1
31070	1	1	4.83333	5	5	0.191404	1	1
31070	2	1	4.83333	5	5	0.193684	1	1
31070	3	1	4.33333	3.8	4	0.173946	1	1
31070	4	1	4.83333	4	4	0.159382	1	1
31071	1	1	4.83333	5	4.66667	0.17363	1	1
31071	2	1	4.83333	5	4.83333	0.167265	1	1
31071	3	1	4.33333	3	3	0.253257	1	1
31071	4	1	4.33333	3	3	0.231331	1	1
31072	1	2.05	3	3	3	1.31585	1	1
31072	2	1.95	3	3	3	1.36874	1	1
31072	3	1.75	3.66667	4	3.66667	2.66864	1	1
31072	4	2.1	3.66667	4	3.66667	1.68427	1	1
31073	1	1.25	3.83333	3.6	3.83333	NaN	1	1
31073	2	1.25	3.66667	4.4	3.83333	NaN	1	1
31073	3	1.2	5	5	4.83333	NaN	1	1
31073	4	1.2	5	5	4.83333	NaN	1	1
31074	1	2	3.5	3	3.16667	6.96368	1	1
31074	2	2	3.33333	3	2.33333	4.441	1	1
31074	3	2	4	5	4	3.00577	1	1
31074	4	2	4.16667	5	3.83333	4.53105	1	1
31075	1	1.5	3	3	3	4.55809	1	1
31075	2	1.35	3.66667	3.4	3.16667	13.1392	1	1
31075	3	1	5	5	4.16667	1.40483	1	1
31075	4	1	5	5	4	1.22977	1	1
31076	1	1	5	5	5	NaN	1	1
31076	2	1	5	5	5	NaN	1	1
31076	3	1	4	3	4.33333	NaN	1	1
31076	4	1	4	3	4.33333	NaN	0	1
31077	1	1.15	5	5	5	NaN	1	1
31077	2	1.15	5	5	5	NaN	1	1
31077	3	1.3	3.33333	3.8	3.83333	NaN	0	1
31077	4	3.2	3.83333	5	5	NaN	0	1
31078	1	1.05	5	5	4.33333	1.95165	1	1
31078	2	1.15	5	5	4.33333	1.98211	1	1
31078	3	1	4	4	3.66667	2.81981	1	1
31078	4	1.3	1.66667	1	1.66667	2.10359	1	0
31079	1	1.05	5	5	5	NaN	1	1
31079	2	1	4.83333	5	5	NaN	1	1
31079	3	1.35	3.83333	4	3.16667	NaN	1	0
31079	4	1.35	4.16667	3	3.33333	NaN	1	0
31080	1	1.3	3.5	2.8	3.16667	0.24101	1	1
31080	2	1.45	4	2.8	3.5	0.162392	1	1
31080	3	1.7	3.66667	2.4	4	0.112033	0	0
31080	4	1.6	4	2.4	4.16667	0.148722	0	0
31081	1	1.05	3.83333	3.2	4	NaN	1	0
31081	2	1.2	3.83333	3	3.16667	NaN	1	0
31081	3	1.05	3	3	3	NaN	1	1
31081	4	1.05	3	3	3	NaN	1	1
31082	1	1.65	3.33333	3	3	0.148857	1	1
31082	2	1.4	3.66667	3.2	3.66667	0.171899	1	1
31082	3	1.05	3.33333	3	3	0.278824	1	1
31082	4	2.15	3	2	2.83333	0.274539	1	1
31083	1	2.7	3.5	3	3	0.137892	0	1
31083	2	2.6	3.66667	3	3	0.0997036	0	1
31083	3	2.5	3.5	3	3.16667	0.158658	0	0
31083	4	2.3	3.5	3	3.16667	0.217834	0	0
31088	1	1.05	2.66667	2.6	3	NaN	1	1
31088	2	1.05	2.83333	2.2	3.16667	NaN	1	1
31088	3	1.5	3.66667	2.2	3.16667	NaN	1	1
31088	4	1.05	3.5	2.2	3.33333	NaN	1	1
31089	1	1.1	3.16667	3	3.16667	0.82895	1	1
31089	2	1	3.16667	3	3.16667	4.24544	1	1
31089	3	1	3	3	3.16667	0.984099	1	1
31089	4	1	3	3	3.16667	0.859556	1	1
31090	1	1.31579	4	4	3.66667	1.74532	1	1
31090	2	1.2	3	3	3	1.53037	1	1
31090	3	1.15	3	3	3	1.5838	1	1
31090	4	1.2	3	3	3	1.8286	1	1
31091	1	1.45	4	4	4	1.00926	1	1
31091	2	1.45	4	4	4	0.754673	1	1
31091	3	1.4	4	4	4	1.0445	1	1
31091	4	1.5	2	2	1.83333	0.986012	1	1
31092	1	2.4	3.33333	2.8	3.33333	1.01546	1	1
31092	2	2.1	3.5	2.4	3.5	1.17451	1	1
31092	3	2.3	4	2.6	3.66667	0.983496	1	1
31092	4	1.55	4	3.6	4.16667	1.05132	1	1
31093	1	2.1	4.16667	3.2	3.66667	NaN	1	1
31093	2	1.4	5	3.4	4.5	NaN	1	1
31093	3	1.4	5	3.2	4.83333	NaN	1	1
31093	4	1.7	5	3.2	4.33333	NaN	1	0
31094	1	1.35	3.66667	3.2	3.16667	0.657886	1	1
31094	2	1.15	3.5	3.2	3.83333	0.517077	1	1
31094	3	1.4	3.33333	2	3.16667	0.555963	1	1
31094	4	1.05	3.66667	2.8	3.16667	6.85307	0	1
31095	1	1.45	3.5	2.6	3.83333	NaN	1	1
31095	2	1.4	3.66667	3.2	3.83333	NaN	1	1
31095	3	1.45	3.83333	3.2	3.83333	NaN	1	1
31095	4	1.5	3.83333	3	3.5	NaN	1	1
31096	1	1.5	3.66667	3.2	3.16667	NaN	1	1
31096	2	1.7	3.17647	3.2	3	NaN	1	1
31096	3	1.85	3.05882	3	3.16667	NaN	1	1
31096	4	1.85	3.29412	3	3.16667	NaN	1	1
31097	1	1.5	3	3.2	3	0.339226	1	1
31097	2	1.5	3.17647	3.4	3	0.112907	1	1
31097	3	1.5	3.05882	3.2	3	0.446955	1	1
31097	4	1.55	3.05882	3.2	3	0.503142	1	1
31098	1	1.45	3.05882	3	3	0.347887	1	1
31098	2	1.55	3	3	3	0.470069	1	1
31098	3	1.4	3.23529	3	3	0.650385	1	1
31098	4	1.4	3.23529	3	3	0.551449	1	1
31099	1	1.8	3.11765	3	2.83333	0.318141	1	1
31099	2	2.65	3.29412	3	3.16667	0.273063	1	1
31099	3	2.65	3.11765	3	2.83333	0.439554	1	1
31099	4	2.35	3.47059	3	3.66667	0.415666	1	1
31100	1	1.65	2.35294	1	2.5	NaN	0	1
31100	2	1.5	2.64706	1.6	3	NaN	0	1
31100	3	1.55	2.76471	2	3	NaN	0	1
31100	4	1.25	2.64706	1.6	3	NaN	0	1
31101	1	1.05	3.29412	3.4	3	0.347356	1	1
31101	2	1.05	3	2.6	2.66667	0.452452	0	1
31101	3	1	3.58824	3.8	3.5	0.411558	0	1
31101	4	1	3.58824	3.8	3.5	0.472229	1	1
31104	1	2	2.88235	2.4	2.83333	0.491366	1	1
31104	2	2	3	2.4	3.16667	0.833046	0	0
31104	3	2	2.94118	2.4	2.83333	2.54752	1	1
31104	4	2	3	2.4	3	0.585502	1	1
31105	1	1.95	2.76471	2.2	3.16667	0.798768	1	1
31105	2	1.9	2.58824	2	2.83333	0.521536	1	1
31105	3	1.75	2.76471	2	3.16667	0.361986	1	1
31105	4	1.7	2.94118	2.2	3.16667	0.696145	1	1
31106	1	2.25	2.52941	2	2.66667	0.734947	1	1
31106	2	2.2	2.58824	2	2.66667	0.897123	0	0
31106	3	1.9	2.64706	2	2.83333	0.473674	1	1
31106	4	1.85	2.58824	2	3	0.548507	1	1
31107	1	1.25	3.05882	2.8	2.83333	0.373218	1	1
31107	2	1.15	3.23529	2.8	3.16667	0.614637	1	1
31107	3	1.3	3.29412	2.8	3.5	0.487627	1	1
31107	4	1.35	3.23529	2.8	3.33333	0.385977	1	1
31108	1	1.55	3	2.4	3.16667	0.987186	1	1
31108	2	1.3	4	4	3.83333	0.942957	1	1
31108	3	1.45	2.64706	2	2	1.36578	1	1
31108	4	1.55	2.82353	2.2	2.5	0.83241	1	1
31109	1	1.45	3.17647	2.6	2.83333	0.949617	0	0
31109	2	1.5	2.76471	2.6	2.66667	0.720182	0	1
31109	3	1.5	3.05882	2.4	3.83333	0.576873	0	1
31109	4	1.2	3.47059	3.2	3.66667	0.807357	0	1
31110	1	1.85	2.82353	2	2.83333	0.781949	1	1
31110	2	2.15	2.88235	2.2	2.83333	0.899869	1	1
31110	3	2.15	3.05882	3	2.83333	1.01222	1	0
31110	4	1.55	3.47059	3.8	3.33333	0.82987	1	0
31111	1	1.2	2.58824	1.6	3	0.922844	0	0
31111	2	1	2.41176	1	3	0.895754	1	0
31111	3	1	2.52941	1.4	3	0.969827	1	1
31111	4	1	2.52941	1.4	3	0.831774	1	1
31112	1	2.1	3.17647	3	3	1.00239	1	1
31112	2	2.2	3.17647	3	3	0.746263	1	1
31112	3	2.1	3.17647	3	3	0.694021	1	1
31112	4	1.35	3.17647	3	3	0.718295	1	1
31113	1	1.9	3.23529	3	3	NaN	1	1
31113	2	1.95	3.23529	3	3.16667	NaN	1	0
31113	3	1.95	3.23529	3	3	NaN	1	0
31113	4	1.95	3.23529	3	3	NaN	1	0
31114	1	1	3.58824	3.2	4	0.332561	1	1
31114	2	1	3.58824	3	4	0.316138	1	1
31114	3	1	2.70588	2.6	2.66667	0.324307	0	1
31114	4	1	2.70588	2.2	3	0.757	0	1
31115	1	1.45	3.52941	3.8	3.33333	NaN	1	1
31115	2	1.7	3.11765	2.6	3.5	NaN	0	1
31115	3	1.7	3.41176	3.6	3.5	NaN	1	1
31115	4	1.4	3.82353	3.8	4.16667	NaN	1	1
31118	1	1.05	3.23529	3	3	NaN	1	0
31118	2	1	3.17647	3	3	NaN	1	0
31118	3	1	3.05882	3	3	NaN	1	0
31118	4	1	3.05882	3	3	NaN	1	1
31119	1	1.55	3.29412	3.2	3.33333	5.80762	1	1
31119	2	1.75	3.29412	3	3.33333	0.526518	1	0
31119	3	1.5	3.70588	4	3.5	1.22823	1	0
31119	4	1.45	4.70588	5	4.5	1.11811	1	0
31120	1	1.95	3.35294	2.6	4	1.80748	1	1
31120	2	2.05	3.41176	2.6	3.66667	1.36806	1	1
31120	3	1.5	3.47059	2.6	4.16667	1.75081	1	1
31120	4	1.45	3.52941	3	4.16667	1.61612	1	1
31121	1	1.8	2.94118	2.6	3.16667	NaN	0	1
31121	2	1	3.11765	2.4	3.16667	NaN	0	1
31121	3	1.55	2.94118	2.4	3.16667	NaN	1	1
31121	4	1.45	2.82353	2.4	3	NaN	1	1
31122	1	1.8	3	3	3	0.708825	1	1
31122	2	2.1	3.11765	3	3	0.582641	1	1
31122	3	2.7	3.17647	3	3	1.1054	1	1
31122	4	2.3	3.23529	3	3	1.08305	1	1
31123	1	1.1	3	3	3	0.824438	1	0
31123	2	1	2.29412	1.8	2.5	0.929777	1	0
31123	3	1	3	3	3	1.11629	1	1
31123	4	1	3.23529	3.2	3.16667	0.888796	1	1

## Sheet: Post - Baseline Sub
Subject	Round	STAI	Mayer A	Mayer B	Mayer I	OT	Trust/Mis	Partner Trust/mis		STAI B	STAI Post	Ot b	OT
31016	1	0.05	3.16667	3.2	3	-0.13	1	1		1.7	1.75	0.35	0.22
31016	2	-0.3	3.16667	3	2.83333	0.12	1	1		1.7	1.4	0.35	0.47
31016	3	0.15	5	5	4.33333	0.09	1	1		1.5	1.65	0.31	0.4
31016	4	-0.25	5	4.8	4	0.01	1	1		1.5	1.25	0.31	0.32
31017	1	0.05	3.83333	3	3.66667	0.26	1	1		1.3	1.35	0.31	0.57
31017	2	0.25	3	2	3.33333	0.31	1	0		1.3	1.55	0.31	0.62
31017	3	0	4	3.8	4	-0.03	1	1		1.5	1.5	0.35	0.32
31017	4	-0.05	4	4	3.83333	-0.08	1	1		1.5	1.45	0.35	0.27
31018	1	0	3.33333	3	3	NaN	1	1		1	1	NaN	NaN
31018	2	0	3.33333	3	3	NaN	1	1		1	1	NaN	NaN
31018	3	0	3.83333	4.4	4.83333	NaN	1	1		1	1	NaN	NaN
31018	4	0.05	4.83333	5	5	NaN	1	1		1	1.05	NaN	NaN
31019	1	0	4	3.2	3.5	NaN	1	1		1	1	NaN	NaN
31019	2	1	4	3.8	3.33333	NaN	0	1		1	2	NaN	NaN
31019	3	0	4.83333	5	4.33333	NaN	1	1		1	1	NaN	NaN
31019	4	0	5	5	4.33333	NaN	1	1		1	1	NaN	NaN
31020	1	0	4	4.6	3.83333	-0.22	1	1		1.2	1.2	0.56	0.34
31020	2	0.15	4	4.8	4.33333	0.01	1	1		1.2	1.35	0.56	0.57
31020	3	0.35	3	2.4	3.16667	0.47	0	1		1.55	1.9	0.45	0.92
31020	4	0	2.66667	2.4	3.5	1.01	1	1		1.55	1.55	0.45	1.46
31021	1	0	4.16667	4.8	4	-0.79	1	1		1.15	1.15	1.43	0.64
31021	2	-0.1	4.16667	4.8	3.83333	0.75	1	1		1.15	1.05	1.43	2.18
31021	3	0	4	4	3.5	0.59	1	1		1	1	0.81	1.4
31021	4	0	3	3	3	0.07	0	1		1	1	0.81	0.88
31022	1	-0.4	4.83333	5	4.5	NaN	1	1		2.5	2.1	NaN	NaN
31022	2	-1.1	5	5	4.83333	NaN	1	1		2.5	1.4	NaN	NaN
31022	3	1.25	3	3	3	NaN	1	0		1.7	2.95	NaN	NaN
31022	4	0.15	3.5	3	3.16667	NaN	1	1		1.7	1.85	NaN	NaN
31023	1	0	4	5	4.16667	0.06	1	1		2.1	2.1	0.76	0.82
31023	2	0.25	4	5	4.5	0.19	1	1		2.1	2.35	0.76	0.95
31023	3	0.2	3	3	3	0.24	1	1		2.25	2.45	0.84	1.08
31023	4	0.45	3	1	2	1.2	1	0		2.25	2.7	0.84	2.04
31024	1	0.95	4.16667	3.8	3.66667	NaN	0	1		1.6	2.55	NaN	NaN
31024	2	1	4.83333	3.8	4.66667	NaN	0	1		1.6	2.6	NaN	NaN
31024	3	-0.1	3	5	4.33333	NaN	1	1		1.1	1	NaN	NaN
31024	4	-0.1	5	5	5	NaN	1	1		1.1	1	NaN	NaN
31025	1	-0.3	3	2.8	3.16667	-0.26	1	1		2	1.7	1.54	1.28
31025	2	-0.4	3.16667	3	3	-0.49	1	1		2	1.6	1.54	1.05
31025	3	0.05	4.16667	5	3.66667	-0.22	1	1		1.85	1.9	1.43	1.21
31025	4	-0.15	4.16667	5	4.5	-0.22	1	1		1.85	1.7	1.43	1.21
31026	1	-0.05	5	5	5	0.14	1	0		1.05	1	0.72	0.86
31026	2	-0.05	4.5	4.8	5	0.24	1	0		1.05	1	0.72	0.96
31026	3	0	5	5	5	-0.28	1	1		1	1	1.12	0.84
31026	4	0	5	5	5	NaN	1	1		1	1	1.12	NaN
31027	1	0	3	1.4	2.66667	-0.1	1	1		1.5	1.5	0.43	0.33
31027	2	-0.1	3	1.4	2.83333	0.13	1	1		1.5	1.4	0.43	0.56
31027	3	0	4.66667	5	4.33333	-0.18	1	1		1.3	1.3	0.57	0.39
31027	4	0	4.5	5	4.33333	0.11	1	1		1.3	1.3	0.57	0.68
31028	1	-0.1	4.66667	4.4	4	NaN	1	1		1.5	1.4	NaN	NaN
31028	2	0	4.83333	4.8	4.5	NaN	1	1		1.5	1.5	NaN	NaN
31028	3	0	3	3	3	NaN	1	1		1.5	1.5	NaN	NaN
31028	4	0	3	3	3	NaN	1	1		1.5	1.5	NaN	NaN
31029	1	0.05	3.83333	4.6	3.83333	NaN	1	1		2.3	2.35	NaN	NaN
31029	2	0.15	4	4.2	3.66667	NaN	1	1		2.3	2.45	NaN	NaN
31029	3	-0.05	3	3	3	NaN	1	1		2.5	2.45	NaN	NaN
31029	4	-0.05	3	3	3	NaN	0	1		2.5	2.45	NaN	NaN
31030	1	-0.25	3.33333	3.2	3.33333	NaN	1	1		1.25	1	NaN	NaN
31030	2	-0.25	3.33333	3.4	3.33333	NaN	1	1		1.25	1	NaN	NaN
31030	3	0.15	3	3	3	NaN	1	1		1	1.15	NaN	NaN
31030	4	0	3	3.4	4	NaN	1	1		1	1	NaN	NaN
31031	1	-0.5	4	4	3.66667	0.5	1	1		1.8	1.3	1.09	1.59
31031	2	-0.3	4	4	3.66667	0.7	1	1		1.8	1.5	1.09	1.79
31031	3	0.0789474	4	4	3.66667	-2.67	1	1		1.42105	1.5	4.18	1.51
31031	4	0.178947	4	4	3.66667	-2.3	1	0		1.42105	1.6	4.18	1.88
31032	1	-0.3	3.16667	2.8	3.16667	-2.5	1	1		1.3	1	3.21	0.71
31032	2	0.2	3.16667	3	3	-1.59	0	1		1.3	1.5	3.21	1.62
31032	3	0.1	4.16667	4.6	3.66667	NaN	1	1		1	1.1	0.93	NaN
31032	4	0.15	4.83333	5	4.33333	NaN	1	1		1	1.15	0.93	NaN
31033	1	0	4	3	3	0.34	0	1		1	1	0.77	1.11
31033	2	0	3.33333	3	3	0.56	1	0		1	1	0.77	1.33
31033	3	0	5	5	4.33333	0.47	1	1		1	1	1.38	1.85
31033	4	0	5	5	4.33333	0.6	1	1		1	1	1.38	1.98
31034	1	-0.15	3.16667	3.2	3.33333	-1.5	1	1		1.15	1	2.63	1.13
31034	2	-0.15	3.16667	3.2	3	-1.87	1	0		1.15	1	2.63	0.76
31034	3	0	4	5	5	-0.24	1	1		1	1	1.59	1.35
31034	4	0	4	5	5	-0.7	1	1		1	1	1.59	0.89
31035	1	0.25	3.16667	2.4	2.83333	0.13	1	0		1.8	2.05	0.67	0.8
31035	2	0.35	3.5	2.2	2.66667	0.7	0	1		1.8	2.15	0.67	1.37
31035	3	0.6	4.66667	5	5	-1.26	1	1		1.4	2	2.8	1.54
31035	4	0.05	4.66667	5	5	-1.24	1	1		1.4	1.45	2.8	1.56
31036	1	-0.05	5	5	5	NaN	1	1		1.2	1.15	NaN	NaN
31036	2	-0.1	5	5	5	NaN	1	1		1.2	1.1	NaN	NaN
31036	3	0.8	4	3.4	3.33333	NaN	0	1		1.3	2.1	NaN	NaN
31036	4	-0.2	4.33333	3.2	2.83333	NaN	1	1		1.3	1.1	NaN	NaN
31037	1	0	4.66667	4.4	4.5	NaN	1	1		1	1	NaN	NaN
31037	2	0	4.5	4.2	4.5	NaN	1	1		1	1	NaN	NaN
31037	3	1.4	3.33333	3	3.5	NaN	0	1		1	2.4	NaN	NaN
31037	4	0.65	3	3	3	NaN	0	0		1	1.65	NaN	NaN
31038	1	0	4	4.4	3.5	0.0645284	1	1		1.9	1.9	0.125119	0.189648
31038	2	0.05	4	4.4	3.66667	-0.0156399	1	1		1.9	1.95	0.125119	0.109479
31038	3	0.1	3.83333	2	3	-0.132991	1	0		2.05	2.15	0.213113	0.0801217
31038	4	0	3.5	2.6	3	-0.121851	1	1		2.05	2.05	0.213113	0.091262
31039	1	0	4.33333	4.6	4.16667	NaN	1	1		1.15	1.15	NaN	NaN
31039	2	-0.05	4.5	4.8	4.33333	NaN	1	1		1.15	1.1	NaN	NaN
31039	3	0.1	3.5	3	3	NaN	1	0		1.1	1.2	NaN	NaN
31039	4	0	3.5	3	3	NaN	0	0		1.1	1.1	NaN	NaN
31040	1	-0.05	3.33333	3	3	-0.0219473	1	1		1.05	1	0.165766	0.143818
31040	2	-0.05	3.16667	3	3	-0.0458493	1	1		1.05	1	0.165766	0.119916
31040	3	0	4.16667	4.2	4.33333	-0.07083	1	1		1	1	0.223029	0.152199
31040	4	0	4	4	4.33333	-0.121681	1	1		1	1	0.223029	0.101348
31041	1	0.05	3	2.6	2.83333	NaN	1	1		1.8	1.85	NaN	NaN
31041	2	0.2	3	3	3	NaN	0	1		1.8	2	NaN	NaN
31041	3	-0.1	3.5	4	3.16667	NaN	1	1		1.75	1.65	NaN	NaN
31041	4	-0.15	4	3.8	3.33333	NaN	1	1		1.75	1.6	NaN	NaN
31042	1	-0.35	3.16667	3.4	3.16667	-0.0327676	1	1		1.95	1.6	0.214886	0.182118
31042	2	-0.25	3.33333	3.6	2.83333	-0.0475715	1	1		1.95	1.7	0.214886	0.167314
31042	3	0.05	5	5	4.66667	-0.0448434	1	1		1.5	1.55	0.208797	0.163954
31042	4	0	5	5	4.66667	-0.0466859	1	1		1.5	1.5	0.208797	0.162111
31043	1	0	3.33333	3.4	3.5	0.0342765	1	1		1.7	1.7	0.0585128	0.0927893
31043	2	0.05	3.16667	3	3	0.116215	1	0		1.7	1.75	0.0585128	0.174728
31043	3	0.15	4.5	5	5	-0.0370955	1	1		1.25	1.4	0.249992	0.212897
31043	4	0	4.83333	5	5	0.0691845	1	1		1.25	1.25	0.249992	0.319177
31044	1	0	4.83333	4.6	3.83333	0.0667862	1	1		1	1	0.127863	0.194649
31044	2	0	4.83333	4.6	4.16667	NaN	1	1		1	1	0.127863	NaN
31044	3	0	4	3.6	3.66667	-0.0588179	1	1		1	1	0.414771	0.355953
31044	4	0	4	3.6	3.66667	NaN	1	1		1	1	0.414771	NaN
31045	1	-0.35	4.5	4.4	4.16667	-0.0469275	1	1		1.7	1.35	0.302085	0.255158
31045	2	-0.5	4.66667	4.8	4.66667	-0.107107	1	1		1.7	1.2	0.302085	0.194978
31045	3	0.25	3	2.2	2.5	-0.0521488	1	0		1.3	1.55	0.363832	0.311683
31045	4	-0.15	3	3	3	-0.15598	0	1		1.3	1.15	0.363832	0.207852
31046	1	-0.2	4.5	5	4.33333	NaN	1	1		1.4	1.2	NaN	NaN
31046	2	-0.05	4.83333	5	4.5	NaN	1	1		1.4	1.35	NaN	NaN
31046	3	-0.3	4	3.4	3.33333	NaN	1	1		2.45	2.15	NaN	NaN
31046	4	-0.1	3	2.6	3	NaN	1	1		2.45	2.35	NaN	NaN
31047	1	-0.4	4.33333	5	5	NaN	1	1		1.5	1.1	NaN	NaN
31047	2	-0.4	4.33333	5	5	NaN	1	1		1.5	1.1	NaN	NaN
31047	3	0.95	4	1.8	3	NaN	0	1		2.6	3.55	NaN	NaN
31047	4	-1.6	3.83333	1	3	NaN	1	0		2.6	1	NaN	NaN
31048	1	0	4	3.4	3.33333	-0.125986	1	1		1.35	1.35	0.302784	0.176797
31048	2	0.05	3.66667	4.2	3.5	0.0202454	1	1		1.35	1.4	0.302784	0.323029
31048	3	-0.15	4.83333	5	4.5	-0.00235119	1	1		1.4	1.25	0.186593	0.184241
31048	4	-0.25	4.83333	5	4.33333	-0.0529398	1	1		1.4	1.15	0.186593	0.133653
31049	1	-0.1	3.16667	3	3	0.0274569	1	1		1.35	1.25	0.156147	0.183604
31049	2	-0.1	3	3	3	0.104198	1	1		1.35	1.25	0.156147	0.260345
31049	3	0	3.83333	4	4.33333	NaN	1	1		1.2	1.2	0.580327	NaN
31049	4	0.1	4	4	4.16667	-0.192646	1	1		1.2	1.3	0.580327	0.387681
31050	1	-0.9	3.5	3.6	3	NaN	1	1		2.4	1.5	NaN	NaN
31050	2	-0.95	3.66667	3.4	3.83333	NaN	1	1		2.4	1.45	NaN	NaN
31050	3	-0.15	4.83333	5	5	NaN	1	1		1.4	1.25	NaN	NaN
31050	4	-0.1	4.83333	5	5	NaN	1	1		1.4	1.3	NaN	NaN
31051	1	0	3.66667	3.2	3.33333	0.0244362	1	1		1.75	1.75	0.478184	0.50262
31051	2	-0.3	4	3.6	3.83333	-0.232023	1	1		1.75	1.45	0.478184	0.24616
31051	3	0	5	5	4.83333	-0.039601	1	1		1	1	0.41154	0.371939
31051	4	0	5	5	5	0.198723	1	1		1	1	0.41154	0.610263
31052	1	0	3.5	3.4	3.83333	NaN	1	1		1.3	1.3	NaN	NaN
31052	2	0.3	3.5	3.6	3.66667	NaN	1	1		1.3	1.6	NaN	NaN
31052	3	0.1	3.5	3	3.16667	NaN	1	1		1.2	1.3	NaN	NaN
31052	4	0.05	4	3.6	4	NaN	1	1		1.2	1.25	NaN	NaN
31053	1	-0.4	4.33333	4.4	4.5	NaN	1	1		1.6	1.2	NaN	NaN
31053	2	-0.2	4.16667	4.2	4.5	NaN	1	1		1.6	1.4	NaN	NaN
31053	3	0.3	3.5	2.2	3.16667	NaN	0	1		1.05	1.35	NaN	NaN
31053	4	-0.05	3.83333	2.8	3.5	NaN	1	1		1.05	1	NaN	NaN
31054	1	-0.55	5	5	5	NaN	1	1		1.7	1.15	NaN	NaN
31054	2	-0.65	5	5	5	NaN	1	1		1.7	1.05	NaN	NaN
31054	3	-0.15	4.16667	3	3.5	NaN	1	1		1.15	1	NaN	NaN
31054	4	-0.15	4.33333	3.8	3.83333	NaN	1	1		1.15	1	NaN	NaN
31055	1	-0.15	4.66667	5	5	NaN	1	1		1.25	1.1	NaN	NaN
31055	2	-0.15	4.66667	5	5	NaN	1	1		1.25	1.1	NaN	NaN
31055	3	0.4	3.16667	2.6	2.83333	NaN	1	0		1.1	1.5	NaN	NaN
31055	4	0.2	3.5	3	3.16667	NaN	1	1		1.1	1.3	NaN	NaN
31056	1	-0.25	3.66667	2.8	3.66667	-0.123278	1	1		1.45	1.2	0.382298	0.25902
31056	2	-0.2	3.66667	2.8	4.16667	-0.113194	1	1		1.45	1.25	0.382298	0.269104
31056	3	-0.1	4.83333	4.6	4.16667	-0.124488	1	1		1.2	1.1	0.455052	0.330564
31056	4	-0.2	4.83333	5	4.16667	-0.0965706	1	1		1.2	1	0.455052	0.358481
31057	1	-0.2	3.5	3.4	3.16667	0.133835	1	1		1.45	1.25	0.389799	0.523634
31057	2	-0.2	3.33333	3.2	3.5	0.188237	1	1		1.45	1.25	0.389799	0.578036
31057	3	-0.15	4.83333	4.4	4.83333	0.198277	1	1		1.4	1.25	0.309971	0.508248
31057	4	-0.3	5	4.6	5	0.164066	1	1		1.4	1.1	0.309971	0.474036
31058	1	-0.3	3.16667	4	3.5	-0.0482633	1	1		2.45	2.15	0.554133	0.505869
31058	2	0	3.16667	4	3.5	-0.0769093	1	1		2.45	2.45	0.554133	0.477223
31058	3	0.1	4.83333	5	4.5	-0.103121	1	1		2.3	2.4	0.526974	0.423853
31058	4	0	4.83333	5	4.83333	-0.0244828	1	1		2.3	2.3	0.526974	0.502491
31059	1	-0.1	3.5	3	3.66667	-0.0635322	1	1		2.1	2	0.553391	0.489858
31059	2	-0.1	3	3	3.33333	-0.0654976	1	1		2.1	2	0.553391	0.487893
31059	3	-0.25	4.5	5	3.5	-0.102576	1	1		2.4	2.15	0.429615	0.327039
31059	4	-0.3	5	5	4.33333	-0.0549249	1	1		2.4	2.1	0.429615	0.37469
31060	1	-0.3	4	4	4	NaN	1	1		2	1.7	NaN	NaN
31060	2	-0.65	4	4	4	NaN	1	1		2	1.35	NaN	NaN
31060	3	-0.3	4	4	4	NaN	1	1		1.9	1.6	NaN	NaN
31060	4	-0.4	4	4	4	NaN	1	1		1.9	1.5	NaN	NaN
31061	1	0	4.83333	3.6	5	0.136883	1	1		1	1	0.378221	0.515104
31061	2	0	4.83333	3.8	5	0.343328	1	1		1	1	0.378221	0.721549
31061	3	0	3	1	1.33333	0.351358	1	1		1	1	0.377968	0.729326
31061	4	0	3	1	2	-0.00126415	0	1		1	1	0.377968	0.376704
31062	1	-0.25	4.83333	4.8	3.83333	NaN	1	1		1.25	1	NaN	NaN
31062	2	-0.25	5	4.8	4.66667	NaN	1	1		1.25	1	NaN	NaN
31062	3	0	4.33333	3.4	4	NaN	1	1		1	1	NaN	NaN
31062	4	0	4.5	4	4.16667	NaN	1	1		1	1	NaN	NaN
31063	1	0	4	4.4	4.33333	NaN	1	1		1.9	1.9	NaN	NaN
31063	2	-0.05	4.16667	4.2	3.5	NaN	1	1		1.9	1.85	NaN	NaN
31063	3	0.05	3.83333	3	3.16667	NaN	1	1		1.9	1.95	NaN	NaN
31063	4	0.15	4	3	3	NaN	1	0		1.9	2.05	NaN	NaN
31064	1	0.05	3.5	3.6	3	0.291847	1	1		1.1	1.15	0.99461	1.28646
31064	2	0.1	3.5	3.6	3.16667	0.93749	1	1		1.1	1.2	0.99461	1.9321
31064	3	0.1	4.16667	4	3.33333	0.294953	1	1		1.1	1.2	1.05502	1.34997
31064	4	0.15	4.16667	4	3.16667	1.37073	1	1		1.1	1.25	1.05502	2.42575
31065	1	0	3	3	3	-0.157987	0	1		1	1	1.78881	1.63083
31065	2	0	3	3	3	-0.439677	0	0		1	1	1.78881	1.34914
31065	3	0	4.33333	5	5	-0.133576	1	1		1	1	1.29858	1.16501
31065	4	0	4	5	5	37.8396	1	1		1	1	1.29858	39.1382
31066	1	-0.05	3.16667	3	3.33333	NaN	1	1		1.55	1.5	NaN	NaN
31066	2	-0.1	3.33333	3.2	3.33333	NaN	1	1		1.55	1.45	NaN	NaN
31066	3	-0.4	5	4.4	4.16667	NaN	1	1		1.45	1.05	NaN	NaN
31066	4	-0.45	5	4.6	4.16667	NaN	1	1		1.45	1	NaN	NaN
31067	1	0.3	4.33333	4.2	3.83333	-0.443141	1	0		1.6	1.9	1.77689	1.33375
31067	2	0.1	3.33333	2.6	3.16667	-0.168501	0	0		1.6	1.7	1.77689	1.60839
31067	3	0.15	4.33333	4.4	3.83333	-0.0257805	1	1		1.5	1.65	1.34653	1.32075
31067	4	-0.05	4.83333	3.8	4	0.0512291	1	1		1.5	1.45	1.34653	1.39776
31068	1	-0.6	4.83333	5	5	0.0430017	1	1		1.7	1.1	0.281632	0.324633
31068	2	-0.5	4.66667	5	5	-0.0240506	1	1		1.7	1.2	0.281632	0.257581
31068	3	0.05	3.66667	3	3.33333	-0.00611774	1	1		1.1	1.15	0.282917	0.276799
31068	4	0	3.5	3	4	0.0352755	1	1		1.1	1.1	0.282917	0.318193
31069	1	-0.05	3.83333	3.8	4	0.0475474	1	1		1.85	1.8	0.430552	0.478099
31069	2	0.2	3.83333	4	4	0.491461	1	1		1.85	2.05	0.430552	0.922013
31069	3	-0.15	3.33333	3.4	3	-0.218398	1	1		2.05	1.9	0.524648	0.306249
31069	4	-0.2	3.66667	3.6	4	-0.243785	1	1		2.05	1.85	0.524648	0.280863
31070	1	0	4.83333	5	5	0.0139372	1	1		1	1	0.177467	0.191404
31070	2	0	4.83333	5	5	0.0162172	1	1		1	1	0.177467	0.193684
31070	3	-0.05	4.33333	3.8	4	-0.129526	1	1		1.05	1	0.303473	0.173946
31070	4	-0.05	4.83333	4	4	-0.144091	1	1		1.05	1	0.303473	0.159382
31071	1	0	4.83333	5	4.66667	-0.0268761	1	1		1	1	0.200506	0.17363
31071	2	0	4.83333	5	4.83333	-0.0332409	1	1		1	1	0.200506	0.167265
31071	3	0	4.33333	3	3	0.0414877	1	1		1	1	0.211769	0.253257
31071	4	0	4.33333	3	3	0.0195623	1	1		1	1	0.211769	0.231331
31072	1	-0.05	3	3	3	-0.0641287	1	1		2.1	2.05	1.37998	1.31585
31072	2	-0.15	3	3	3	-0.0112404	1	1		2.1	1.95	1.37998	1.36874
31072	3	-0.2	3.66667	4	3.66667	1.22463	1	1		1.95	1.75	1.44401	2.66864
31072	4	0.15	3.66667	4	3.66667	0.24026	1	1		1.95	2.1	1.44401	1.68427
31073	1	-0.25	3.83333	3.6	3.83333	NaN	1	1		1.5	1.25	NaN	NaN
31073	2	-0.25	3.66667	4.4	3.83333	NaN	1	1		1.5	1.25	NaN	NaN
31073	3	-0.1	5	5	4.83333	NaN	1	1		1.3	1.2	NaN	NaN
31073	4	-0.1	5	5	4.83333	NaN	1	1		1.3	1.2	NaN	NaN
31074	1	0	3.5	3	3.16667	2.25051	1	1		2	2	4.71317	6.96368
31074	2	0	3.33333	3	2.33333	-0.272171	1	1		2	2	4.71317	4.441
31074	3	-0.05	4	5	4	-0.703923	1	1		2.05	2	3.70969	3.00577
31074	4	-0.05	4.16667	5	3.83333	0.821364	1	1		2.05	2	3.70969	4.53105
31075	1	-0.15	3	3	3	-0.522651	1	1		1.65	1.5	5.08074	4.55809
31075	2	-0.3	3.66667	3.4	3.16667	8.05847	1	1		1.65	1.35	5.08074	13.1392
31075	3	-0.3	5	5	4.16667	0.467347	1	1		1.3	1	0.937481	1.40483
31075	4	-0.3	5	5	4	0.292286	1	1		1.3	1	0.937481	1.22977
31076	1	-0.1	5	5	5	NaN	1	1		1.1	1	NaN	NaN
31076	2	-0.1	5	5	5	NaN	1	1		1.1	1	NaN	NaN
31076	3	0	4	3	4.33333	NaN	1	1		1	1	NaN	NaN
31076	4	0	4	3	4.33333	NaN	0	1		1	1	NaN	NaN
31077	1	0	5	5	5	NaN	1	1		1.15	1.15	NaN	NaN
31077	2	0	5	5	5	NaN	1	1		1.15	1.15	NaN	NaN
31077	3	0.15	3.33333	3.8	3.83333	NaN	0	1		1.15	1.3	NaN	NaN
31077	4	2.05	3.83333	5	5	NaN	0	1		1.15	3.2	NaN	NaN
31078	1	-0.4	5	5	4.33333	-0.518284	1	1		1.45	1.05	2.46994	1.95165
31078	2	-0.3	5	5	4.33333	-0.487825	1	1		1.45	1.15	2.46994	1.98211
31078	3	-0.45	4	4	3.66667	0.389509	1	1		1.45	1	2.4303	2.81981
31078	4	-0.15	1.66667	1	1.66667	-0.326712	1	0		1.45	1.3	2.4303	2.10359
31079	1	-0.5	5	5	5	NaN	1	1		1.55	1.05	NaN	NaN
31079	2	-0.55	4.83333	5	5	NaN	1	1		1.55	1	NaN	NaN
31079	3	0.1	3.83333	4	3.16667	NaN	1	0		1.25	1.35	NaN	NaN
31079	4	0.1	4.16667	3	3.33333	NaN	1	0		1.25	1.35	NaN	NaN
31080	1	-0.25	3.5	2.8	3.16667	0.0439448	1	1		1.55	1.3	0.197066	0.24101
31080	2	-0.1	4	2.8	3.5	-0.0346737	1	1		1.55	1.45	0.197066	0.162392
31080	3	0.35	3.66667	2.4	4	0.00232269	0	0		1.35	1.7	0.10971	0.112033
31080	4	0.25	4	2.4	4.16667	0.0390112	0	0		1.35	1.6	0.10971	0.148722
31081	1	-0.3	3.83333	3.2	4	NaN	1	0		1.35	1.05	NaN	NaN
31081	2	-0.15	3.83333	3	3.16667	NaN	1	0		1.35	1.2	NaN	NaN
31081	3	0	3	3	3	NaN	1	1		1.05	1.05	NaN	NaN
31081	4	0	3	3	3	NaN	1	1		1.05	1.05	NaN	NaN
31082	1	-0.45	3.33333	3	3	0.0397447	1	1		2.1	1.65	0.109112	0.148857
31082	2	-0.7	3.66667	3.2	3.66667	0.0627863	1	1		2.1	1.4	0.109112	0.171899
31082	3	-0.15	3.33333	3	3	0.124302	1	1		1.2	1.05	0.154521	0.278824
31082	4	0.95	3	2	2.83333	0.120018	1	1		1.2	2.15	0.154521	0.274539
31083	1	0.1	3.5	3	3	0.0518672	0	1		2.6	2.7	0.0860252	0.137892
31083	2	0	3.66667	3	3	0.0136784	0	1		2.6	2.6	0.0860252	0.0997036
31083	3	-0.2	3.5	3	3.16667	-0.00174372	0	0		2.7	2.5	0.160401	0.158658
31083	4	-0.4	3.5	3	3.16667	0.0574326	0	0		2.7	2.3	0.160401	0.217834
31088	1	-0.4	2.66667	2.6	3	NaN	1	1		1.45	1.05	NaN	NaN
31088	2	-0.4	2.83333	2.2	3.16667	NaN	1	1		1.45	1.05	NaN	NaN
31088	3	0.45	3.66667	2.2	3.16667	NaN	1	1		1.05	1.5	NaN	NaN
31088	4	0	3.5	2.2	3.33333	NaN	1	1		1.05	1.05	NaN	NaN
31089	1	-0.05	3.16667	3	3.16667	-0.1577	1	1		1.15	1.1	0.986651	0.82895
31089	2	-0.15	3.16667	3	3.16667	3.25879	1	1		1.15	1	0.986651	4.24544
31089	3	0	3	3	3.16667	0.309391	1	1		1	1	0.674709	0.984099
31089	4	0	3	3	3.16667	0.184847	1	1		1	1	0.674709	0.859556
31090	1	-0.184211	4	4	3.66667	-0.121562	1	1		1.5	1.31579	1.86688	1.74532
31090	2	-0.3	3	3	3	-0.336509	1	1		1.5	1.2	1.86688	1.53037
31090	3	-0.05	3	3	3	0.328463	1	1		1.2	1.15	1.25533	1.5838
31090	4	0	3	3	3	0.573269	1	1		1.2	1.2	1.25533	1.8286
31091	1	-0.2	4	4	4	0.000618362	1	1		1.65	1.45	1.00865	1.00926
31091	2	-0.2	4	4	4	-0.253972	1	1		1.65	1.45	1.00865	0.754673
31091	3	-0.05	4	4	4	0.218224	1	1		1.45	1.4	0.826271	1.0445
31091	4	0.05	2	2	1.83333	0.159741	1	1		1.45	1.5	0.826271	0.986012
31092	1	-0.4	3.33333	2.8	3.33333	0.150319	1	1		2.8	2.4	0.865139	1.01546
31092	2	-0.7	3.5	2.4	3.5	0.309369	1	1		2.8	2.1	0.865139	1.17451
31092	3	0.45	4	2.6	3.66667	-0.399563	1	1		1.85	2.3	1.38306	0.983496
31092	4	-0.3	4	3.6	4.16667	-0.331743	1	1		1.85	1.55	1.38306	1.05132
31093	1	0.25	4.16667	3.2	3.66667	NaN	1	1		1.85	2.1	NaN	NaN
31093	2	-0.45	5	3.4	4.5	NaN	1	1		1.85	1.4	NaN	NaN
31093	3	-0.3	5	3.2	4.83333	NaN	1	1		1.7	1.4	NaN	NaN
31093	4	0	5	3.2	4.33333	NaN	1	0		1.7	1.7	NaN	NaN
31094	1	-0.1	3.66667	3.2	3.16667	-0.0467337	1	1		1.45	1.35	0.70462	0.657886
31094	2	-0.3	3.5	3.2	3.83333	-0.187543	1	1		1.45	1.15	0.70462	0.517077
31094	3	-0.05	3.33333	2	3.16667	0.0744302	1	1		1.45	1.4	0.481533	0.555963
31094	4	-0.4	3.66667	2.8	3.16667	6.37154	0	1		1.45	1.05	0.481533	6.85307
31095	1	-0.15	3.5	2.6	3.83333	NaN	1	1		1.6	1.45	NaN	NaN
31095	2	-0.2	3.66667	3.2	3.83333	NaN	1	1		1.6	1.4	NaN	NaN
31095	3	-0.2	3.83333	3.2	3.83333	NaN	1	1		1.65	1.45	NaN	NaN
31095	4	-0.15	3.83333	3	3.5	NaN	1	1		1.65	1.5	NaN	NaN
31096	1	-0.333333	3.66667	3.2	3.16667	NaN	1	1		1.83333	1.5	NaN	NaN
31096	2	-0.133333	3.17647	3.2	3	NaN	1	1		1.83333	1.7	NaN	NaN
31096	3	0.05	3.05882	3	3.16667	NaN	1	1		1.8	1.85	NaN	NaN
31096	4	0.05	3.29412	3	3.16667	NaN	1	1		1.8	1.85	NaN	NaN
31097	1	-0.15	3	3.2	3	-0.153267	1	1		1.65	1.5	0.492494	0.339226
31097	2	-0.15	3.17647	3.4	3	-0.379587	1	1		1.65	1.5	0.492494	0.112907
31097	3	0	3.05882	3.2	3	-0.00861848	1	1		1.5	1.5	0.455574	0.446955
31097	4	0.05	3.05882	3.2	3	0.0475685	1	1		1.5	1.55	0.455574	0.503142
31098	1	-0.1	3.05882	3	3	-0.153337	1	1		1.55	1.45	0.501224	0.347887
31098	2	0	3	3	3	-0.0311547	1	1		1.55	1.55	0.501224	0.470069
31098	3	-0.1	3.23529	3	3	0.221493	1	1		1.5	1.4	0.428892	0.650385
31098	4	-0.1	3.23529	3	3	0.122557	1	1		1.5	1.4	0.428892	0.551449
31099	1	-0.15	3.11765	3	2.83333	-0.110096	1	1		1.95	1.8	0.428237	0.318141
31099	2	0.7	3.29412	3	3.16667	-0.155174	1	1		1.95	2.65	0.428237	0.273063
31099	3	0.85	3.11765	3	2.83333	-0.151144	1	1		1.8	2.65	0.590698	0.439554
31099	4	0.55	3.47059	3	3.66667	-0.175032	1	1		1.8	2.35	0.590698	0.415666
31100	1	0.3	2.35294	1	2.5	NaN	0	1		1.35	1.65	NaN	NaN
31100	2	0.15	2.64706	1.6	3	NaN	0	1		1.35	1.5	NaN	NaN
31100	3	0.3	2.76471	2	3	NaN	0	1		1.25	1.55	NaN	NaN
31100	4	0	2.64706	1.6	3	NaN	0	1		1.25	1.25	NaN	NaN
31101	1	-0.35	3.29412	3.4	3	0.0230805	1	1		1.4	1.05	0.324276	0.347356
31101	2	-0.35	3	2.6	2.66667	0.128177	0	1		1.4	1.05	0.324276	0.452452
31101	3	0	3.58824	3.8	3.5	-0.102463	0	1		1	1	0.514021	0.411558
31101	4	0	3.58824	3.8	3.5	-0.0417919	1	1		1	1	0.514021	0.472229
31104	1	0.05	2.88235	2.4	2.83333	0.0982473	1	1		1.95	2	0.393119	0.491366
31104	2	0.05	3	2.4	3.16667	0.439927	0	0		1.95	2	0.393119	0.833046
31104	3	-0.05	2.94118	2.4	2.83333	1.9016	1	1		2.05	2	0.645929	2.54752
31104	4	-0.05	3	2.4	3	-0.0604266	1	1		2.05	2	0.645929	0.585502
31105	1	0.1	2.76471	2.2	3.16667	0.284355	1	1		1.85	1.95	0.514414	0.798768
31105	2	0.05	2.58824	2	2.83333	0.00712274	1	1		1.85	1.9	0.514414	0.521536
31105	3	-0.2	2.76471	2	3.16667	-0.313208	1	1		1.95	1.75	0.675193	0.361986
31105	4	-0.25	2.94118	2.2	3.16667	0.0209514	1	1		1.95	1.7	0.675193	0.696145
31106	1	0.1	2.52941	2	2.66667	0.414367	1	1		2.15	2.25	0.320581	0.734947
31106	2	0.05	2.58824	2	2.66667	0.576542	0	0		2.15	2.2	0.320581	0.897123
31106	3	-0.1	2.64706	2	2.83333	-0.0290838	1	1		2	1.9	0.502758	0.473674
31106	4	-0.15	2.58824	2	3	0.0457494	1	1		2	1.85	0.502758	0.548507
31107	1	-0.25	3.05882	2.8	2.83333	-0.211643	1	1		1.5	1.25	0.584861	0.373218
31107	2	-0.35	3.23529	2.8	3.16667	0.029776	1	1		1.5	1.15	0.584861	0.614637
31107	3	0.15	3.29412	2.8	3.5	-0.0642432	1	1		1.15	1.3	0.55187	0.487627
31107	4	0.2	3.23529	2.8	3.33333	-0.165893	1	1		1.15	1.35	0.55187	0.385977
31108	1	-0.15	3	2.4	3.16667	-1.57066	1	1		1.7	1.55	2.55784	0.987186
31108	2	-0.4	4	4	3.83333	-1.61489	1	1		1.7	1.3	2.55784	0.942957
31108	3	0.4	2.64706	2	2	0.140236	1	1		1.05	1.45	1.22555	1.36578
31108	4	0.5	2.82353	2.2	2.5	-0.393136	1	1		1.05	1.55	1.22555	0.83241
31109	1	-0.4	3.17647	2.6	2.83333	0.276829	0	0		1.85	1.45	0.672788	0.949617
31109	2	-0.35	2.76471	2.6	2.66667	0.0473937	0	1		1.85	1.5	0.672788	0.720182
31109	3	0.25	3.05882	2.4	3.83333	-0.224952	0	1		1.25	1.5	0.801825	0.576873
31109	4	-0.05	3.47059	3.2	3.66667	0.00553208	0	1		1.25	1.2	0.801825	0.807357
31110	1	-0.15	2.82353	2	2.83333	-0.15449	1	1		2	1.85	0.936439	0.781949
31110	2	0.15	2.88235	2.2	2.83333	-0.0365707	1	1		2	2.15	0.936439	0.899869
31110	3	0.55	3.05882	3	2.83333	0.0490368	1	0		1.6	2.15	0.963182	1.01222
31110	4	-0.05	3.47059	3.8	3.33333	-0.133312	1	0		1.6	1.55	0.963182	0.82987
31111	1	-0.15	2.58824	1.6	3	-0.0916971	0	0		1.35	1.2	1.01454	0.922844
31111	2	-0.35	2.41176	1	3	-0.118787	1	0		1.35	1	1.01454	0.895754
31111	3	0	2.52941	1.4	3	-0.379554	1	1		1	1	1.34938	0.969827
31111	4	0	2.52941	1.4	3	-0.517607	1	1		1	1	1.34938	0.831774
31112	1	0	3.17647	3	3	0.283424	1	1		2.1	2.1	0.718966	1.00239
31112	2	0.1	3.17647	3	3	0.0272974	1	1		2.1	2.2	0.718966	0.746263
31112	3	0	3.17647	3	3	-0.237322	1	1		2.1	2.1	0.931343	0.694021
31112	4	-0.75	3.17647	3	3	-0.213048	1	1		2.1	1.35	0.931343	0.718295
31113	1	-0.05	3.23529	3	3	NaN	1	1		1.95	1.9	NaN	NaN
31113	2	0	3.23529	3	3.16667	NaN	1	0		1.95	1.95	NaN	NaN
31113	3	0	3.23529	3	3	NaN	1	0		1.95	1.95	NaN	NaN
31113	4	0	3.23529	3	3	NaN	1	0		1.95	1.95	NaN	NaN
31114	1	-0.2	3.58824	3.2	4	0.0248303	1	1		1.2	1	0.307731	0.332561
31114	2	-0.2	3.58824	3	4	0.00840773	1	1		1.2	1	0.307731	0.316138
31114	3	0	2.70588	2.6	2.66667	-0.133743	0	1		1	1	0.45805	0.324307
31114	4	0	2.70588	2.2	3	0.29895	0	1		1	1	0.45805	0.757
31115	1	-0.15	3.52941	3.8	3.33333	NaN	1	1		1.6	1.45	NaN	NaN
31115	2	0.1	3.11765	2.6	3.5	NaN	0	1		1.6	1.7	NaN	NaN
31115	3	0.05	3.41176	3.6	3.5	NaN	1	1		1.65	1.7	NaN	NaN
31115	4	-0.25	3.82353	3.8	4.16667	NaN	1	1		1.65	1.4	NaN	NaN
31118	1	-0.2	3.23529	3	3	NaN	1	0		1.25	1.05	NaN	NaN
31118	2	-0.25	3.17647	3	3	NaN	1	0		1.25	1	NaN	NaN
31118	3	-0.05	3.05882	3	3	NaN	1	0		1.05	1	NaN	NaN
31118	4	-0.05	3.05882	3	3	NaN	1	1		1.05	1	NaN	NaN
31119	1	-0.2	3.29412	3.2	3.33333	5.08358	1	1		1.75	1.55	0.724039	5.80762
31119	2	0	3.29412	3	3.33333	-0.197522	1	0		1.75	1.75	0.724039	0.526518
31119	3	0.05	3.70588	4	3.5	-0.158961	1	0		1.45	1.5	1.38719	1.22823
31119	4	0	4.70588	5	4.5	-0.269081	1	0		1.45	1.45	1.38719	1.11811
31120	1	-0.1	3.35294	2.6	4	0.112951	1	1		2.05	1.95	1.69453	1.80748
31120	2	0	3.41176	2.6	3.66667	-0.326463	1	1		2.05	2.05	1.69453	1.36806
31120	3	-0.6	3.47059	2.6	4.16667	-0.119756	1	1		2.1	1.5	1.87056	1.75081
31120	4	-0.65	3.52941	3	4.16667	-0.254443	1	1		2.1	1.45	1.87056	1.61612
31121	1	0.15	2.94118	2.6	3.16667	NaN	0	1		1.65	1.8	NaN	NaN
31121	2	-0.65	3.11765	2.4	3.16667	NaN	0	1		1.65	1	NaN	NaN
31121	3	-0.3	2.94118	2.4	3.16667	NaN	1	1		1.85	1.55	NaN	NaN
31121	4	-0.4	2.82353	2.4	3	NaN	1	1		1.85	1.45	NaN	NaN
31122	1	0.1	3	3	3	-1.09276	1	1		1.7	1.8	1.80158	0.708825
31122	2	0.4	3.11765	3	3	-1.21894	1	1		1.7	2.1	1.80158	0.582641
31122	3	0.6	3.17647	3	3	-0.281768	1	1		2.1	2.7	1.38717	1.1054
31122	4	0.2	3.23529	3	3	-0.304112	1	1		2.1	2.3	1.38717	1.08305
31123	1	-0.05	3	3	3	-0.043536	1	0		1.15	1.1	0.867974	0.824438
31123	2	-0.15	2.29412	1.8	2.5	0.0618032	1	0		1.15	1	0.867974	0.929777
31123	3	0	3	3	3	0.363294	1	1		1	1	0.752991	1.11629
31123	4	0	3.23529	3.2	3.16667	0.135805	1	1		1	1	0.752991	0.888796

## Sheet: Post - Baseline Div
Subject	Round	STAI	Mayer A	Mayer B	Mayer I	OT	Trust/Mis	Partner Trust/mis		STAI B	STAI Post	Ot b	OT
31016	1	1.02941	3.16667	3.2	3	0.628571	1	1		1.7	1.75	0.35	0.22
31016	2	0.823529	3.16667	3	2.83333	1.34286	1	1		1.7	1.4	0.35	0.47
31016	3	1.1	5	5	4.33333	1.29032	1	1		1.5	1.65	0.31	0.4
31016	4	0.833333	5	4.8	4	1.03226	1	1		1.5	1.25	0.31	0.32
31017	1	1.03846	3.83333	3	3.66667	1.83871	1	1		1.3	1.35	0.31	0.57
31017	2	1.19231	3	2	3.33333	2	1	0		1.3	1.55	0.31	0.62
31017	3	1	4	3.8	4	0.914286	1	1		1.5	1.5	0.35	0.32
31017	4	0.966667	4	4	3.83333	0.771429	1	1		1.5	1.45	0.35	0.27
31018	1	1	3.33333	3	3	NaN	1	1		1	1	NaN	NaN
31018	2	1	3.33333	3	3	NaN	1	1		1	1	NaN	NaN
31018	3	1	3.83333	4.4	4.83333	NaN	1	1		1	1	NaN	NaN
31018	4	1.05	4.83333	5	5	NaN	1	1		1	1.05	NaN	NaN
31019	1	1	4	3.2	3.5	NaN	1	1		1	1	NaN	NaN
31019	2	2	4	3.8	3.33333	NaN	0	1		1	2	NaN	NaN
31019	3	1	4.83333	5	4.33333	NaN	1	1		1	1	NaN	NaN
31019	4	1	5	5	4.33333	NaN	1	1		1	1	NaN	NaN
31020	1	1	4	4.6	3.83333	0.607143	1	1		1.2	1.2	0.56	0.34
31020	2	1.125	4	4.8	4.33333	1.01786	1	1		1.2	1.35	0.56	0.57
31020	3	1.22581	3	2.4	3.16667	2.04444	0	1		1.55	1.9	0.45	0.92
31020	4	1	2.66667	2.4	3.5	3.24444	1	1		1.55	1.55	0.45	1.46
31021	1	1	4.16667	4.8	4	0.447552	1	1		1.15	1.15	1.43	0.64
31021	2	0.913043	4.16667	4.8	3.83333	1.52448	1	1		1.15	1.05	1.43	2.18
31021	3	1	4	4	3.5	1.7284	1	1		1	1	0.81	1.4
31021	4	1	3	3	3	1.08642	0	1		1	1	0.81	0.88
31022	1	0.84	4.83333	5	4.5	NaN	1	1		2.5	2.1	NaN	NaN
31022	2	0.56	5	5	4.83333	NaN	1	1		2.5	1.4	NaN	NaN
31022	3	1.73529	3	3	3	NaN	1	0		1.7	2.95	NaN	NaN
31022	4	1.08824	3.5	3	3.16667	NaN	1	1		1.7	1.85	NaN	NaN
31023	1	1	4	5	4.16667	1.07895	1	1		2.1	2.1	0.76	0.82
31023	2	1.11905	4	5	4.5	1.25	1	1		2.1	2.35	0.76	0.95
31023	3	1.08889	3	3	3	1.28571	1	1		2.25	2.45	0.84	1.08
31023	4	1.2	3	1	2	2.42857	1	0		2.25	2.7	0.84	2.04
31024	1	1.59375	4.16667	3.8	3.66667	NaN	0	1		1.6	2.55	NaN	NaN
31024	2	1.625	4.83333	3.8	4.66667	NaN	0	1		1.6	2.6	NaN	NaN
31024	3	0.909091	3	5	4.33333	NaN	1	1		1.1	1	NaN	NaN
31024	4	0.909091	5	5	5	NaN	1	1		1.1	1	NaN	NaN
31025	1	0.85	3	2.8	3.16667	0.831169	1	1		2	1.7	1.54	1.28
31025	2	0.8	3.16667	3	3	0.681818	1	1		2	1.6	1.54	1.05
31025	3	1.02703	4.16667	5	3.66667	0.846154	1	1		1.85	1.9	1.43	1.21
31025	4	0.918919	4.16667	5	4.5	0.846154	1	1		1.85	1.7	1.43	1.21
31026	1	0.952381	5	5	5	1.19444	1	0		1.05	1	0.72	0.86
31026	2	0.952381	4.5	4.8	5	1.33333	1	0		1.05	1	0.72	0.96
31026	3	1	5	5	5	0.75	1	1		1	1	1.12	0.84
31026	4	1	5	5	5	NaN	1	1		1	1	1.12	NaN
31027	1	1	3	1.4	2.66667	0.767442	1	1		1.5	1.5	0.43	0.33
31027	2	0.933333	3	1.4	2.83333	1.30233	1	1		1.5	1.4	0.43	0.56
31027	3	1	4.66667	5	4.33333	0.684211	1	1		1.3	1.3	0.57	0.39
31027	4	1	4.5	5	4.33333	1.19298	1	1		1.3	1.3	0.57	0.68
31028	1	0.933333	4.66667	4.4	4	NaN	1	1		1.5	1.4	NaN	NaN
31028	2	1	4.83333	4.8	4.5	NaN	1	1		1.5	1.5	NaN	NaN
31028	3	1	3	3	3	NaN	1	1		1.5	1.5	NaN	NaN
31028	4	1	3	3	3	NaN	1	1		1.5	1.5	NaN	NaN
31029	1	1.02174	3.83333	4.6	3.83333	NaN	1	1		2.3	2.35	NaN	NaN
31029	2	1.06522	4	4.2	3.66667	NaN	1	1		2.3	2.45	NaN	NaN
31029	3	0.98	3	3	3	NaN	1	1		2.5	2.45	NaN	NaN
31029	4	0.98	3	3	3	NaN	0	1		2.5	2.45	NaN	NaN
31030	1	0.8	3.33333	3.2	3.33333	NaN	1	1		1.25	1	NaN	NaN
31030	2	0.8	3.33333	3.4	3.33333	NaN	1	1		1.25	1	NaN	NaN
31030	3	1.15	3	3	3	NaN	1	1		1	1.15	NaN	NaN
31030	4	1	3	3.4	4	NaN	1	1		1	1	NaN	NaN
31031	1	0.722222	4	4	3.66667	1.45872	1	1		1.8	1.3	1.09	1.59
31031	2	0.833333	4	4	3.66667	1.6422	1	1		1.8	1.5	1.09	1.79
31031	3	1.05556	4	4	3.66667	0.361244	1	1		1.42105	1.5	4.18	1.51
31031	4	1.12593	4	4	3.66667	0.449761	1	0		1.42105	1.6	4.18	1.88
31032	1	0.769231	3.16667	2.8	3.16667	0.221184	1	1		1.3	1	3.21	0.71
31032	2	1.15385	3.16667	3	3	0.504673	0	1		1.3	1.5	3.21	1.62
31032	3	1.1	4.16667	4.6	3.66667	NaN	1	1		1	1.1	0.93	NaN
31032	4	1.15	4.83333	5	4.33333	NaN	1	1		1	1.15	0.93	NaN
31033	1	1	4	3	3	1.44156	0	1		1	1	0.77	1.11
31033	2	1	3.33333	3	3	1.72727	1	0		1	1	0.77	1.33
31033	3	1	5	5	4.33333	1.34058	1	1		1	1	1.38	1.85
31033	4	1	5	5	4.33333	1.43478	1	1		1	1	1.38	1.98
31034	1	0.869565	3.16667	3.2	3.33333	0.429658	1	1		1.15	1	2.63	1.13
31034	2	0.869565	3.16667	3.2	3	0.288973	1	0		1.15	1	2.63	0.76
31034	3	1	4	5	5	0.849057	1	1		1	1	1.59	1.35
31034	4	1	4	5	5	0.559748	1	1		1	1	1.59	0.89
31035	1	1.13889	3.16667	2.4	2.83333	1.19403	1	0		1.8	2.05	0.67	0.8
31035	2	1.19444	3.5	2.2	2.66667	2.04478	0	1		1.8	2.15	0.67	1.37
31035	3	1.42857	4.66667	5	5	0.55	1	1		1.4	2	2.8	1.54
31035	4	1.03571	4.66667	5	5	0.557143	1	1		1.4	1.45	2.8	1.56
31036	1	0.958333	5	5	5	NaN	1	1		1.2	1.15	NaN	NaN
31036	2	0.916667	5	5	5	NaN	1	1		1.2	1.1	NaN	NaN
31036	3	1.61538	4	3.4	3.33333	NaN	0	1		1.3	2.1	NaN	NaN
31036	4	0.846154	4.33333	3.2	2.83333	NaN	1	1		1.3	1.1	NaN	NaN
31037	1	1	4.66667	4.4	4.5	NaN	1	1		1	1	NaN	NaN
31037	2	1	4.5	4.2	4.5	NaN	1	1		1	1	NaN	NaN
31037	3	2.4	3.33333	3	3.5	NaN	0	1		1	2.4	NaN	NaN
31037	4	1.65	3	3	3	NaN	0	0		1	1.65	NaN	NaN
31038	1	1	4	4.4	3.5	1.51574	1	1		1.9	1.9	0.125119	0.189648
31038	2	1.02632	4	4.4	3.66667	0.875	1	1		1.9	1.95	0.125119	0.109479
31038	3	1.04878	3.83333	2	3	0.375959	1	0		2.05	2.15	0.213113	0.0801217
31038	4	1	3.5	2.6	3	0.428234	1	1		2.05	2.05	0.213113	0.091262
31039	1	1	4.33333	4.6	4.16667	NaN	1	1		1.15	1.15	NaN	NaN
31039	2	0.956522	4.5	4.8	4.33333	NaN	1	1		1.15	1.1	NaN	NaN
31039	3	1.09091	3.5	3	3	NaN	1	0		1.1	1.2	NaN	NaN
31039	4	1	3.5	3	3	NaN	0	0		1.1	1.1	NaN	NaN
31040	1	0.952381	3.33333	3	3	0.8676	1	1		1.05	1	0.165766	0.143818
31040	2	0.952381	3.16667	3	3	0.723409	1	1		1.05	1	0.165766	0.119916
31040	3	1	4.16667	4.2	4.33333	0.682418	1	1		1	1	0.223029	0.152199
31040	4	1	4	4	4.33333	0.454417	1	1		1	1	0.223029	0.101348
31041	1	1.02778	3	2.6	2.83333	NaN	1	1		1.8	1.85	NaN	NaN
31041	2	1.11111	3	3	3	NaN	0	1		1.8	2	NaN	NaN
31041	3	0.942857	3.5	4	3.16667	NaN	1	1		1.75	1.65	NaN	NaN
31041	4	0.914286	4	3.8	3.33333	NaN	1	1		1.75	1.6	NaN	NaN
31042	1	0.820513	3.16667	3.4	3.16667	0.847511	1	1		1.95	1.6	0.214886	0.182118
31042	2	0.871795	3.33333	3.6	2.83333	0.778619	1	1		1.95	1.7	0.214886	0.167314
31042	3	1.03333	5	5	4.66667	0.78523	1	1		1.5	1.55	0.208797	0.163954
31042	4	1	5	5	4.66667	0.776406	1	1		1.5	1.5	0.208797	0.162111
31043	1	1	3.33333	3.4	3.5	1.5858	1	1		1.7	1.7	0.0585128	0.0927893
31043	2	1.02941	3.16667	3	3	2.98615	1	0		1.7	1.75	0.0585128	0.174728
31043	3	1.12	4.5	5	5	0.851614	1	1		1.25	1.4	0.249992	0.212897
31043	4	1	4.83333	5	5	1.27675	1	1		1.25	1.25	0.249992	0.319177
31044	1	1	4.83333	4.6	3.83333	1.52233	1	1		1	1	0.127863	0.194649
31044	2	1	4.83333	4.6	4.16667	NaN	1	1		1	1	0.127863	NaN
31044	3	1	4	3.6	3.66667	0.858192	1	1		1	1	0.414771	0.355953
31044	4	1	4	3.6	3.66667	NaN	1	1		1	1	0.414771	NaN
31045	1	0.794118	4.5	4.4	4.16667	0.844655	1	1		1.7	1.35	0.302085	0.255158
31045	2	0.705882	4.66667	4.8	4.66667	0.645441	1	1		1.7	1.2	0.302085	0.194978
31045	3	1.19231	3	2.2	2.5	0.856668	1	0		1.3	1.55	0.363832	0.311683
31045	4	0.884615	3	3	3	0.571285	0	1		1.3	1.15	0.363832	0.207852
31046	1	0.857143	4.5	5	4.33333	NaN	1	1		1.4	1.2	NaN	NaN
31046	2	0.964286	4.83333	5	4.5	NaN	1	1		1.4	1.35	NaN	NaN
31046	3	0.877551	4	3.4	3.33333	NaN	1	1		2.45	2.15	NaN	NaN
31046	4	0.959184	3	2.6	3	NaN	1	1		2.45	2.35	NaN	NaN
31047	1	0.733333	4.33333	5	5	NaN	1	1		1.5	1.1	NaN	NaN
31047	2	0.733333	4.33333	5	5	NaN	1	1		1.5	1.1	NaN	NaN
31047	3	1.36538	4	1.8	3	NaN	0	1		2.6	3.55	NaN	NaN
31047	4	0.384615	3.83333	1	3	NaN	1	0		2.6	1	NaN	NaN
31048	1	1	4	3.4	3.33333	0.583906	1	1		1.35	1.35	0.302784	0.176797
31048	2	1.03704	3.66667	4.2	3.5	1.06686	1	1		1.35	1.4	0.302784	0.323029
31048	3	0.892857	4.83333	5	4.5	0.987399	1	1		1.4	1.25	0.186593	0.184241
31048	4	0.821429	4.83333	5	4.33333	0.716282	1	1		1.4	1.15	0.186593	0.133653
31049	1	0.925926	3.16667	3	3	1.17584	1	1		1.35	1.25	0.156147	0.183604
31049	2	0.925926	3	3	3	1.66731	1	1		1.35	1.25	0.156147	0.260345
31049	3	1	3.83333	4	4.33333	NaN	1	1		1.2	1.2	0.580327	NaN
31049	4	1.08333	4	4	4.16667	0.668038	1	1		1.2	1.3	0.580327	0.387681
31050	1	0.625	3.5	3.6	3	NaN	1	1		2.4	1.5	NaN	NaN
31050	2	0.604167	3.66667	3.4	3.83333	NaN	1	1		2.4	1.45	NaN	NaN
31050	3	0.892857	4.83333	5	5	NaN	1	1		1.4	1.25	NaN	NaN
31050	4	0.928571	4.83333	5	5	NaN	1	1		1.4	1.3	NaN	NaN
31051	1	1	3.66667	3.2	3.33333	1.0511	1	1		1.75	1.75	0.478184	0.50262
31051	2	0.828571	4	3.6	3.83333	0.514782	1	1		1.75	1.45	0.478184	0.24616
31051	3	1	5	5	4.83333	0.903774	1	1		1	1	0.41154	0.371939
31051	4	1	5	5	5	1.48288	1	1		1	1	0.41154	0.610263
31052	1	1	3.5	3.4	3.83333	NaN	1	1		1.3	1.3	NaN	NaN
31052	2	1.23077	3.5	3.6	3.66667	NaN	1	1		1.3	1.6	NaN	NaN
31052	3	1.08333	3.5	3	3.16667	NaN	1	1		1.2	1.3	NaN	NaN
31052	4	1.04167	4	3.6	4	NaN	1	1		1.2	1.25	NaN	NaN
31053	1	0.75	4.33333	4.4	4.5	NaN	1	1		1.6	1.2	NaN	NaN
31053	2	0.875	4.16667	4.2	4.5	NaN	1	1		1.6	1.4	NaN	NaN
31053	3	1.28571	3.5	2.2	3.16667	NaN	0	1		1.05	1.35	NaN	NaN
31053	4	0.952381	3.83333	2.8	3.5	NaN	1	1		1.05	1	NaN	NaN
31054	1	0.676471	5	5	5	NaN	1	1		1.7	1.15	NaN	NaN
31054	2	0.617647	5	5	5	NaN	1	1		1.7	1.05	NaN	NaN
31054	3	0.869565	4.16667	3	3.5	NaN	1	1		1.15	1	NaN	NaN
31054	4	0.869565	4.33333	3.8	3.83333	NaN	1	1		1.15	1	NaN	NaN
31055	1	0.88	4.66667	5	5	NaN	1	1		1.25	1.1	NaN	NaN
31055	2	0.88	4.66667	5	5	NaN	1	1		1.25	1.1	NaN	NaN
31055	3	1.36364	3.16667	2.6	2.83333	NaN	1	0		1.1	1.5	NaN	NaN
31055	4	1.18182	3.5	3	3.16667	NaN	1	1		1.1	1.3	NaN	NaN
31056	1	0.827586	3.66667	2.8	3.66667	0.677535	1	1		1.45	1.2	0.382298	0.25902
31056	2	0.862069	3.66667	2.8	4.16667	0.703912	1	1		1.45	1.25	0.382298	0.269104
31056	3	0.916667	4.83333	4.6	4.16667	0.726432	1	1		1.2	1.1	0.455052	0.330564
31056	4	0.833333	4.83333	5	4.16667	0.787781	1	1		1.2	1	0.455052	0.358481
31057	1	0.862069	3.5	3.4	3.16667	1.34334	1	1		1.45	1.25	0.389799	0.523634
31057	2	0.862069	3.33333	3.2	3.5	1.48291	1	1		1.45	1.25	0.389799	0.578036
31057	3	0.892857	4.83333	4.4	4.83333	1.63966	1	1		1.4	1.25	0.309971	0.508248
31057	4	0.785714	5	4.6	5	1.52929	1	1		1.4	1.1	0.309971	0.474036
31058	1	0.877551	3.16667	4	3.5	0.912903	1	1		2.45	2.15	0.554133	0.505869
31058	2	1	3.16667	4	3.5	0.861208	1	1		2.45	2.45	0.554133	0.477223
31058	3	1.04348	4.83333	5	4.5	0.804315	1	1		2.3	2.4	0.526974	0.423853
31058	4	1	4.83333	5	4.83333	0.953541	1	1		2.3	2.3	0.526974	0.502491
31059	1	0.952381	3.5	3	3.66667	0.885195	1	1		2.1	2	0.553391	0.489858
31059	2	0.952381	3	3	3.33333	0.881643	1	1		2.1	2	0.553391	0.487893
31059	3	0.895833	4.5	5	3.5	0.761238	1	1		2.4	2.15	0.429615	0.327039
31059	4	0.875	5	5	4.33333	0.872153	1	1		2.4	2.1	0.429615	0.37469
31060	1	0.85	4	4	4	NaN	1	1		2	1.7	NaN	NaN
31060	2	0.675	4	4	4	NaN	1	1		2	1.35	NaN	NaN
31060	3	0.842105	4	4	4	NaN	1	1		1.9	1.6	NaN	NaN
31060	4	0.789474	4	4	4	NaN	1	1		1.9	1.5	NaN	NaN
31061	1	1	4.83333	3.6	5	1.36191	1	1		1	1	0.378221	0.515104
31061	2	1	4.83333	3.8	5	1.90774	1	1		1	1	0.378221	0.721549
31061	3	1	3	1	1.33333	1.9296	1	1		1	1	0.377968	0.729326
31061	4	1	3	1	2	0.996655	0	1		1	1	0.377968	0.376704
31062	1	0.8	4.83333	4.8	3.83333	NaN	1	1		1.25	1	NaN	NaN
31062	2	0.8	5	4.8	4.66667	NaN	1	1		1.25	1	NaN	NaN
31062	3	1	4.33333	3.4	4	NaN	1	1		1	1	NaN	NaN
31062	4	1	4.5	4	4.16667	NaN	1	1		1	1	NaN	NaN
31063	1	1	4	4.4	4.33333	NaN	1	1		1.9	1.9	NaN	NaN
31063	2	0.973684	4.16667	4.2	3.5	NaN	1	1		1.9	1.85	NaN	NaN
31063	3	1.02632	3.83333	3	3.16667	NaN	1	1		1.9	1.95	NaN	NaN
31063	4	1.07895	4	3	3	NaN	1	0		1.9	2.05	NaN	NaN
31064	1	1.04545	3.5	3.6	3	1.29343	1	1		1.1	1.15	0.99461	1.28646
31064	2	1.09091	3.5	3.6	3.16667	1.94257	1	1		1.1	1.2	0.99461	1.9321
31064	3	1.09091	4.16667	4	3.33333	1.27957	1	1		1.1	1.2	1.05502	1.34997
31064	4	1.13636	4.16667	4	3.16667	2.29925	1	1		1.1	1.25	1.05502	2.42575
31065	1	1	3	3	3	0.91168	0	1		1	1	1.78881	1.63083
31065	2	1	3	3	3	0.754207	0	0		1	1	1.78881	1.34914
31065	3	1	4.33333	5	5	0.897137	1	1		1	1	1.29858	1.16501
31065	4	1	4	5	5	30.1392	1	1		1	1	1.29858	39.1382
31066	1	0.967742	3.16667	3	3.33333	NaN	1	1		1.55	1.5	NaN	NaN
31066	2	0.935484	3.33333	3.2	3.33333	NaN	1	1		1.55	1.45	NaN	NaN
31066	3	0.724138	5	4.4	4.16667	NaN	1	1		1.45	1.05	NaN	NaN
31066	4	0.689655	5	4.6	4.16667	NaN	1	1		1.45	1	NaN	NaN
31067	1	1.1875	4.33333	4.2	3.83333	0.750609	1	0		1.6	1.9	1.77689	1.33375
31067	2	1.0625	3.33333	2.6	3.16667	0.905171	0	0		1.6	1.7	1.77689	1.60839
31067	3	1.1	4.33333	4.4	3.83333	0.980854	1	1		1.5	1.65	1.34653	1.32075
31067	4	0.966667	4.83333	3.8	4	1.03805	1	1		1.5	1.45	1.34653	1.39776
31068	1	0.647059	4.83333	5	5	1.15269	1	1		1.7	1.1	0.281632	0.324633
31068	2	0.705882	4.66667	5	5	0.914602	1	1		1.7	1.2	0.281632	0.257581
31068	3	1.04545	3.66667	3	3.33333	0.978376	1	1		1.1	1.15	0.282917	0.276799
31068	4	1	3.5	3	4	1.12468	1	1		1.1	1.1	0.282917	0.318193
31069	1	0.972973	3.83333	3.8	4	1.11043	1	1		1.85	1.8	0.430552	0.478099
31069	2	1.10811	3.83333	4	4	2.14147	1	1		1.85	2.05	0.430552	0.922013
31069	3	0.926829	3.33333	3.4	3	0.583724	1	1		2.05	1.9	0.524648	0.306249
31069	4	0.902439	3.66667	3.6	4	0.535336	1	1		2.05	1.85	0.524648	0.280863
31070	1	1	4.83333	5	5	1.07853	1	1		1	1	0.177467	0.191404
31070	2	1	4.83333	5	5	1.09138	1	1		1	1	0.177467	0.193684
31070	3	0.952381	4.33333	3.8	4	0.573186	1	1		1.05	1	0.303473	0.173946
31070	4	0.952381	4.83333	4	4	0.525193	1	1		1.05	1	0.303473	0.159382
31071	1	1	4.83333	5	4.66667	0.865959	1	1		1	1	0.200506	0.17363
31071	2	1	4.83333	5	4.83333	0.834215	1	1		1	1	0.200506	0.167265
31071	3	1	4.33333	3	3	1.19591	1	1		1	1	0.211769	0.253257
31071	4	1	4.33333	3	3	1.09238	1	1		1	1	0.211769	0.231331
31072	1	0.97619	3	3	3	0.953529	1	1		2.1	2.05	1.37998	1.31585
31072	2	0.928571	3	3	3	0.991855	1	1		2.1	1.95	1.37998	1.36874
31072	3	0.897436	3.66667	4	3.66667	1.84808	1	1		1.95	1.75	1.44401	2.66864
31072	4	1.07692	3.66667	4	3.66667	1.16638	1	1		1.95	2.1	1.44401	1.68427
31073	1	0.833333	3.83333	3.6	3.83333	NaN	1	1		1.5	1.25	NaN	NaN
31073	2	0.833333	3.66667	4.4	3.83333	NaN	1	1		1.5	1.25	NaN	NaN
31073	3	0.923077	5	5	4.83333	NaN	1	1		1.3	1.2	NaN	NaN
31073	4	0.923077	5	5	4.83333	NaN	1	1		1.3	1.2	NaN	NaN
31074	1	1	3.5	3	3.16667	1.47749	1	1		2	2	4.71317	6.96368
31074	2	1	3.33333	3	2.33333	0.942253	1	1		2	2	4.71317	4.441
31074	3	0.97561	4	5	4	0.810248	1	1		2.05	2	3.70969	3.00577
31074	4	0.97561	4.16667	5	3.83333	1.22141	1	1		2.05	2	3.70969	4.53105
31075	1	0.909091	3	3	3	0.897131	1	1		1.65	1.5	5.08074	4.55809
31075	2	0.818182	3.66667	3.4	3.16667	2.58608	1	1		1.65	1.35	5.08074	13.1392
31075	3	0.769231	5	5	4.16667	1.49851	1	1		1.3	1	0.937481	1.40483
31075	4	0.769231	5	5	4	1.31178	1	1		1.3	1	0.937481	1.22977
31076	1	0.909091	5	5	5	NaN	1	1		1.1	1	NaN	NaN
31076	2	0.909091	5	5	5	NaN	1	1		1.1	1	NaN	NaN
31076	3	1	4	3	4.33333	NaN	1	1		1	1	NaN	NaN
31076	4	1	4	3	4.33333	NaN	0	1		1	1	NaN	NaN
31077	1	1	5	5	5	NaN	1	1		1.15	1.15	NaN	NaN
31077	2	1	5	5	5	NaN	1	1		1.15	1.15	NaN	NaN
31077	3	1.13043	3.33333	3.8	3.83333	NaN	0	1		1.15	1.3	NaN	NaN
31077	4	2.78261	3.83333	5	5	NaN	0	1		1.15	3.2	NaN	NaN
31078	1	0.724138	5	5	4.33333	0.790163	1	1		1.45	1.05	2.46994	1.95165
31078	2	0.793103	5	5	4.33333	0.802495	1	1		1.45	1.15	2.46994	1.98211
31078	3	0.689655	4	4	3.66667	1.16027	1	1		1.45	1	2.4303	2.81981
31078	4	0.896552	1.66667	1	1.66667	0.865567	1	0		1.45	1.3	2.4303	2.10359
31079	1	0.677419	5	5	5	NaN	1	1		1.55	1.05	NaN	NaN
31079	2	0.645161	4.83333	5	5	NaN	1	1		1.55	1	NaN	NaN
31079	3	1.08	3.83333	4	3.16667	NaN	1	0		1.25	1.35	NaN	NaN
31079	4	1.08	4.16667	3	3.33333	NaN	1	0		1.25	1.35	NaN	NaN
31080	1	0.83871	3.5	2.8	3.16667	1.223	1	1		1.55	1.3	0.197066	0.24101
31080	2	0.935484	4	2.8	3.5	0.82405	1	1		1.55	1.45	0.197066	0.162392
31080	3	1.25926	3.66667	2.4	4	1.02117	0	0		1.35	1.7	0.10971	0.112033
31080	4	1.18519	4	2.4	4.16667	1.35558	0	0		1.35	1.6	0.10971	0.148722
31081	1	0.777778	3.83333	3.2	4	NaN	1	0		1.35	1.05	NaN	NaN
31081	2	0.888889	3.83333	3	3.16667	NaN	1	0		1.35	1.2	NaN	NaN
31081	3	1	3	3	3	NaN	1	1		1.05	1.05	NaN	NaN
31081	4	1	3	3	3	NaN	1	1		1.05	1.05	NaN	NaN
31082	1	0.785714	3.33333	3	3	1.36425	1	1		2.1	1.65	0.109112	0.148857
31082	2	0.666667	3.66667	3.2	3.66667	1.57543	1	1		2.1	1.4	0.109112	0.171899
31082	3	0.875	3.33333	3	3	1.80443	1	1		1.2	1.05	0.154521	0.278824
31082	4	1.79167	3	2	2.83333	1.77671	1	1		1.2	2.15	0.154521	0.274539
31083	1	1.03846	3.5	3	3	1.60293	0	1		2.6	2.7	0.0860252	0.137892
31083	2	1	3.66667	3	3	1.159	0	1		2.6	2.6	0.0860252	0.0997036
31083	3	0.925926	3.5	3	3.16667	0.989129	0	0		2.7	2.5	0.160401	0.158658
31083	4	0.851852	3.5	3	3.16667	1.35806	0	0		2.7	2.3	0.160401	0.217834
31088	1	0.724138	2.66667	2.6	3	NaN	1	1		1.45	1.05	NaN	NaN
31088	2	0.724138	2.83333	2.2	3.16667	NaN	1	1		1.45	1.05	NaN	NaN
31088	3	1.42857	3.66667	2.2	3.16667	NaN	1	1		1.05	1.5	NaN	NaN
31088	4	1	3.5	2.2	3.33333	NaN	1	1		1.05	1.05	NaN	NaN
31089	1	0.956522	3.16667	3	3.16667	0.840166	1	1		1.15	1.1	0.986651	0.82895
31089	2	0.869565	3.16667	3	3.16667	4.30288	1	1		1.15	1	0.986651	4.24544
31089	3	1	3	3	3.16667	1.45855	1	1		1	1	0.674709	0.984099
31089	4	1	3	3	3.16667	1.27397	1	1		1	1	0.674709	0.859556
31090	1	0.877193	4	4	3.66667	0.934885	1	1		1.5	1.31579	1.86688	1.74532
31090	2	0.8	3	3	3	0.819748	1	1		1.5	1.2	1.86688	1.53037
31090	3	0.958333	3	3	3	1.26165	1	1		1.2	1.15	1.25533	1.5838
31090	4	1	3	3	3	1.45667	1	1		1.2	1.2	1.25533	1.8286
31091	1	0.878788	4	4	4	1.00061	1	1		1.65	1.45	1.00865	1.00926
31091	2	0.878788	4	4	4	0.748205	1	1		1.65	1.45	1.00865	0.754673
31091	3	0.965517	4	4	4	1.26411	1	1		1.45	1.4	0.826271	1.0445
31091	4	1.03448	2	2	1.83333	1.19333	1	1		1.45	1.5	0.826271	0.986012
31092	1	0.857143	3.33333	2.8	3.33333	1.17375	1	1		2.8	2.4	0.865139	1.01546
31092	2	0.75	3.5	2.4	3.5	1.3576	1	1		2.8	2.1	0.865139	1.17451
31092	3	1.24324	4	2.6	3.66667	0.711102	1	1		1.85	2.3	1.38306	0.983496
31092	4	0.837838	4	3.6	4.16667	0.760138	1	1		1.85	1.55	1.38306	1.05132
31093	1	1.13514	4.16667	3.2	3.66667	NaN	1	1		1.85	2.1	NaN	NaN
31093	2	0.756757	5	3.4	4.5	NaN	1	1		1.85	1.4	NaN	NaN
31093	3	0.823529	5	3.2	4.83333	NaN	1	1		1.7	1.4	NaN	NaN
31093	4	1	5	3.2	4.33333	NaN	1	0		1.7	1.7	NaN	NaN
31094	1	0.931034	3.66667	3.2	3.16667	0.933675	1	1		1.45	1.35	0.70462	0.657886
31094	2	0.793103	3.5	3.2	3.83333	0.733838	1	1		1.45	1.15	0.70462	0.517077
31094	3	0.965517	3.33333	2	3.16667	1.15457	1	1		1.45	1.4	0.481533	0.555963
31094	4	0.724138	3.66667	2.8	3.16667	14.2318	0	1		1.45	1.05	0.481533	6.85307
31095	1	0.90625	3.5	2.6	3.83333	NaN	1	1		1.6	1.45	NaN	NaN
31095	2	0.875	3.66667	3.2	3.83333	NaN	1	1		1.6	1.4	NaN	NaN
31095	3	0.878788	3.83333	3.2	3.83333	NaN	1	1		1.65	1.45	NaN	NaN
31095	4	0.909091	3.83333	3	3.5	NaN	1	1		1.65	1.5	NaN	NaN
31096	1	0.818182	3.66667	3.2	3.16667	NaN	1	1		1.83333	1.5	NaN	NaN
31096	2	0.927273	3.17647	3.2	3	NaN	1	1		1.83333	1.7	NaN	NaN
31096	3	1.02778	3.05882	3	3.16667	NaN	1	1		1.8	1.85	NaN	NaN
31096	4	1.02778	3.29412	3	3.16667	NaN	1	1		1.8	1.85	NaN	NaN
31097	1	0.909091	3	3.2	3	0.688793	1	1		1.65	1.5	0.492494	0.339226
31097	2	0.909091	3.17647	3.4	3	0.229255	1	1		1.65	1.5	0.492494	0.112907
31097	3	1	3.05882	3.2	3	0.981082	1	1		1.5	1.5	0.455574	0.446955
31097	4	1.03333	3.05882	3.2	3	1.10441	1	1		1.5	1.55	0.455574	0.503142
31098	1	0.935484	3.05882	3	3	0.694075	1	1		1.55	1.45	0.501224	0.347887
31098	2	1	3	3	3	0.937843	1	1		1.55	1.55	0.501224	0.470069
31098	3	0.933333	3.23529	3	3	1.51643	1	1		1.5	1.4	0.428892	0.650385
31098	4	0.933333	3.23529	3	3	1.28575	1	1		1.5	1.4	0.428892	0.551449
31099	1	0.923077	3.11765	3	2.83333	0.742909	1	1		1.95	1.8	0.428237	0.318141
31099	2	1.35897	3.29412	3	3.16667	0.637644	1	1		1.95	2.65	0.428237	0.273063
31099	3	1.47222	3.11765	3	2.83333	0.744126	1	1		1.8	2.65	0.590698	0.439554
31099	4	1.30556	3.47059	3	3.66667	0.703686	1	1		1.8	2.35	0.590698	0.415666
31100	1	1.22222	2.35294	1	2.5	NaN	0	1		1.35	1.65	NaN	NaN
31100	2	1.11111	2.64706	1.6	3	NaN	0	1		1.35	1.5	NaN	NaN
31100	3	1.24	2.76471	2	3	NaN	0	1		1.25	1.55	NaN	NaN
31100	4	1	2.64706	1.6	3	NaN	0	1		1.25	1.25	NaN	NaN
31101	1	0.75	3.29412	3.4	3	1.07118	1	1		1.4	1.05	0.324276	0.347356
31101	2	0.75	3	2.6	2.66667	1.39527	0	1		1.4	1.05	0.324276	0.452452
31101	3	1	3.58824	3.8	3.5	0.800664	0	1		1	1	0.514021	0.411558
31101	4	1	3.58824	3.8	3.5	0.918696	1	1		1	1	0.514021	0.472229
31104	1	1.02564	2.88235	2.4	2.83333	1.24992	1	1		1.95	2	0.393119	0.491366
31104	2	1.02564	3	2.4	3.16667	2.11907	0	0		1.95	2	0.393119	0.833046
31104	3	0.97561	2.94118	2.4	2.83333	3.94397	1	1		2.05	2	0.645929	2.54752
31104	4	0.97561	3	2.4	3	0.90645	1	1		2.05	2	0.645929	0.585502
31105	1	1.05405	2.76471	2.2	3.16667	1.55277	1	1		1.85	1.95	0.514414	0.798768
31105	2	1.02703	2.58824	2	2.83333	1.01385	1	1		1.85	1.9	0.514414	0.521536
31105	3	0.897436	2.76471	2	3.16667	0.536122	1	1		1.95	1.75	0.675193	0.361986
31105	4	0.871795	2.94118	2.2	3.16667	1.03103	1	1		1.95	1.7	0.675193	0.696145
31106	1	1.04651	2.52941	2	2.66667	2.29255	1	1		2.15	2.25	0.320581	0.734947
31106	2	1.02326	2.58824	2	2.66667	2.79843	0	0		2.15	2.2	0.320581	0.897123
31106	3	0.95	2.64706	2	2.83333	0.942152	1	1		2	1.9	0.502758	0.473674
31106	4	0.925	2.58824	2	3	1.091	1	1		2	1.85	0.502758	0.548507
31107	1	0.833333	3.05882	2.8	2.83333	0.638132	1	1		1.5	1.25	0.584861	0.373218
31107	2	0.766667	3.23529	2.8	3.16667	1.05091	1	1		1.5	1.15	0.584861	0.614637
31107	3	1.13043	3.29412	2.8	3.5	0.88359	1	1		1.15	1.3	0.55187	0.487627
31107	4	1.17391	3.23529	2.8	3.33333	0.699398	1	1		1.15	1.35	0.55187	0.385977
31108	1	0.911765	3	2.4	3.16667	0.385945	1	1		1.7	1.55	2.55784	0.987186
31108	2	0.764706	4	4	3.83333	0.368653	1	1		1.7	1.3	2.55784	0.942957
31108	3	1.38095	2.64706	2	2	1.11443	1	1		1.05	1.45	1.22555	1.36578
31108	4	1.47619	2.82353	2.2	2.5	0.679215	1	1		1.05	1.55	1.22555	0.83241
31109	1	0.783784	3.17647	2.6	2.83333	1.41146	0	0		1.85	1.45	0.672788	0.949617
31109	2	0.810811	2.76471	2.6	2.66667	1.07044	0	1		1.85	1.5	0.672788	0.720182
31109	3	1.2	3.05882	2.4	3.83333	0.71945	0	1		1.25	1.5	0.801825	0.576873
31109	4	0.96	3.47059	3.2	3.66667	1.0069	0	1		1.25	1.2	0.801825	0.807357
31110	1	0.925	2.82353	2	2.83333	0.835024	1	1		2	1.85	0.936439	0.781949
31110	2	1.075	2.88235	2.2	2.83333	0.960947	1	1		2	2.15	0.936439	0.899869
31110	3	1.34375	3.05882	3	2.83333	1.05091	1	0		1.6	2.15	0.963182	1.01222
31110	4	0.96875	3.47059	3.8	3.33333	0.861592	1	0		1.6	1.55	0.963182	0.82987
31111	1	0.888889	2.58824	1.6	3	0.909617	0	0		1.35	1.2	1.01454	0.922844
31111	2	0.740741	2.41176	1	3	0.882915	1	0		1.35	1	1.01454	0.895754
31111	3	1	2.52941	1.4	3	0.71872	1	1		1	1	1.34938	0.969827
31111	4	1	2.52941	1.4	3	0.616412	1	1		1	1	1.34938	0.831774
31112	1	1	3.17647	3	3	1.39421	1	1		2.1	2.1	0.718966	1.00239
31112	2	1.04762	3.17647	3	3	1.03797	1	1		2.1	2.2	0.718966	0.746263
31112	3	1	3.17647	3	3	0.745183	1	1		2.1	2.1	0.931343	0.694021
31112	4	0.642857	3.17647	3	3	0.771246	1	1		2.1	1.35	0.931343	0.718295
31113	1	0.974359	3.23529	3	3	NaN	1	1		1.95	1.9	NaN	NaN
31113	2	1	3.23529	3	3.16667	NaN	1	0		1.95	1.95	NaN	NaN
31113	3	1	3.23529	3	3	NaN	1	0		1.95	1.95	NaN	NaN
31113	4	1	3.23529	3	3	NaN	1	0		1.95	1.95	NaN	NaN
31114	1	0.833333	3.58824	3.2	4	1.08069	1	1		1.2	1	0.307731	0.332561
31114	2	0.833333	3.58824	3	4	1.02732	1	1		1.2	1	0.307731	0.316138
31114	3	1	2.70588	2.6	2.66667	0.708017	0	1		1	1	0.45805	0.324307
31114	4	1	2.70588	2.2	3	1.65266	0	1		1	1	0.45805	0.757
31115	1	0.90625	3.52941	3.8	3.33333	NaN	1	1		1.6	1.45	NaN	NaN
31115	2	1.0625	3.11765	2.6	3.5	NaN	0	1		1.6	1.7	NaN	NaN
31115	3	1.0303	3.41176	3.6	3.5	NaN	1	1		1.65	1.7	NaN	NaN
31115	4	0.848485	3.82353	3.8	4.16667	NaN	1	1		1.65	1.4	NaN	NaN
31118	1	0.84	3.23529	3	3	NaN	1	0		1.25	1.05	NaN	NaN
31118	2	0.8	3.17647	3	3	NaN	1	0		1.25	1	NaN	NaN
31118	3	0.952381	3.05882	3	3	NaN	1	0		1.05	1	NaN	NaN
31118	4	0.952381	3.05882	3	3	NaN	1	1		1.05	1	NaN	NaN
31119	1	0.885714	3.29412	3.2	3.33333	8.02114	1	1		1.75	1.55	0.724039	5.80762
31119	2	1	3.29412	3	3.33333	0.727195	1	0		1.75	1.75	0.724039	0.526518
31119	3	1.03448	3.70588	4	3.5	0.885408	1	0		1.45	1.5	1.38719	1.22823
31119	4	1	4.70588	5	4.5	0.806024	1	0		1.45	1.45	1.38719	1.11811
31120	1	0.95122	3.35294	2.6	4	1.06666	1	1		2.05	1.95	1.69453	1.80748
31120	2	1	3.41176	2.6	3.66667	0.807342	1	1		2.05	2.05	1.69453	1.36806
31120	3	0.714286	3.47059	2.6	4.16667	0.935979	1	1		2.1	1.5	1.87056	1.75081
31120	4	0.690476	3.52941	3	4.16667	0.863975	1	1		2.1	1.45	1.87056	1.61612
31121	1	1.09091	2.94118	2.6	3.16667	NaN	0	1		1.65	1.8	NaN	NaN
31121	2	0.606061	3.11765	2.4	3.16667	NaN	0	1		1.65	1	NaN	NaN
31121	3	0.837838	2.94118	2.4	3.16667	NaN	1	1		1.85	1.55	NaN	NaN
31121	4	0.783784	2.82353	2.4	3	NaN	1	1		1.85	1.45	NaN	NaN
31122	1	1.05882	3	3	3	0.393446	1	1		1.7	1.8	1.80158	0.708825
31122	2	1.23529	3.11765	3	3	0.323405	1	1		1.7	2.1	1.80158	0.582641
31122	3	1.28571	3.17647	3	3	0.796875	1	1		2.1	2.7	1.38717	1.1054
31122	4	1.09524	3.23529	3	3	0.780767	1	1		2.1	2.3	1.38717	1.08305
31123	1	0.956522	3	3	3	0.949842	1	0		1.15	1.1	0.867974	0.824438
31123	2	0.869565	2.29412	1.8	2.5	1.0712	1	0		1.15	1	0.867974	0.929777
31123	3	1	3	3	3	1.48247	1	1		1	1	0.752991	1.11629
31123	4	1	3.23529	3.2	3.16667	1.18035	1	1		1	1	0.752991	0.888796
